## The Role of Interspecies recombinations in the evolution of antibiotic-resistant pneumococci

Joshua C. D'Aeth<sup>1</sup>, Mark P.G. van der Linden<sup>2</sup>, Lesley McGee<sup>3</sup>, Herminia De Lencastre<sup>4</sup>, Paul Turner<sup>5</sup>, Jae-Hoon Song<sup>6</sup>, Stephanie W. Lo<sup>7</sup>, Rebecca A. Gladstone<sup>7</sup>, Raquel Sá-Leão<sup>4</sup>, Kwan Soo Ko<sup>6</sup>, William P. Hanage<sup>8</sup>, Bernard Beall<sup>3</sup>, Stephen D. Bentley<sup>7</sup>, Nicholas J. Croucher<sup>1</sup> and The GPS Consortium<sup>7</sup>

1. MRC Centre for Global Infectious Disease Analysis, Department of Infectious Disease Epidemiology, Imperial College London, London, UK
2. Institute for Medical Microbiology, National Reference Center for Streptococci, University Hospital, RWTH Aachen, Pauwelsstrasse 30, Aachen, Germany
3. Respiratory Diseases Branch, Centers for Disease Control and Prevention, Atlanta, Georgia, USA
4. Laboratory of Molecular Genetics, Instituto de Tecnologia Química e Biológica, Universidade Nova de Lisboa, Oeiras, Portugal
5. Cambodia-Oxford Medical Research Unit, Angkor Hospital for Children, Siem Reap, Cambodia
6. Department of Molecular Cell Biology, Sungkyunkwan University School of Medicine, Suwon, South Korea
7. Pathogens & Microbes, Wellcome Sanger Institute, Wellcome Genome Campus, Hinxton, Cambridge, UK
8. Center for Communicable Disease Dynamics, Harvard T.H. Chan School of Public Health, Boston, Massachusetts, USA

### 1 Abstract

2 The evolutionary histories of the antibiotic-resistant *Streptococcus pneumoniae* lineages PMEN3 and  
3 PMEN9 were reconstructed using global collections of genomes. In PMEN3, one resistant clade spread  
4 worldwide, and underwent 25 serotype switches, enabling evasion of vaccine-induced immunity. In  
5 PMEN9, only 9 switches were detected, and multiple resistant lineages emerged independently and  
6 circulated locally. In Germany, PMEN9's expansion correlated significantly with the macrolide:penicillin  
7 consumption ratio. These isolates were penicillin sensitive but macrolide resistant, through a homologous  
8 recombination that integrated Tn1207.1 into a competence gene, preventing further diversification via  
9 transformation. Analysis of a species-wide dataset found 183 acquisitions of macrolide resistance, and  
10 multiple gains of the tetracycline-resistant transposon Tn916, through homologous recombination, often  
11 originating in other streptococcal species. Consequently, antibiotic selection preserves atypical recom-  
12 bination events that cause sequence divergence and structural variation throughout the *S. pneumoniae*  
13 chromosome. These events reveal the genetic exchanges between species normally counter-selected  
14 until perturbed by clinical interventions.

## 15 Introduction

16 Infections caused by *Streptococcus pneumoniae* (the pneumococcus) remain a leading cause of death  
17 worldwide in children under the age of 5 [1,2]. This nasopharyngeal commensal and respiratory pathogen  
18 causes a range of severe infections in both infants and adults, including pneumonia, sepsis and menin-  
19 gitis. These have a high mortality rate, which is further increased when the causative pneumococcus  
20 is resistant to antibiotics [3,4]. This presents a worrying challenge to clinicians, with treatment options  
21 decreasing for resistant infections [5]. As the pneumococcus is endemic worldwide, its ability to develop  
22 antibiotic resistance is a global challenge [6]. Furthermore, this resistance is under selection by com-  
23 munity antibiotic consumption, which is driven by common non-invasive pneumococcal diseases, such  
24 as otitis media [7,8]. High levels of resistance have been observed in Africa [9], Asia and the Americas.  
25 Even in Europe, where resistance is less common, deaths attributable to penicillin resistant pneumococci  
26 have been rising over the past 15 years [3].

27 There are two main mechanisms by which pneumococci evolve antibiotic resistance: the modifica-  
28 tion of core genes encoding antibiotic targets through homologous recombination, and the acquisition of  
29 specialized resistance genes on mobile genetic elements (MGEs) [7,10]. As the plasmid repertoire of  
30 *S. pneumoniae* is limited to two types of cryptic elements [11–13], the MGEs that contribute most to the  
31 spread of antibiotic resistance are integrative and conjugative elements (ICEs) [14,15]. These MGEs in-  
32 sert within the host genome via encoded integrase genes [16], and have been referred to as king makers  
33 of bacterial lineages [17]. Conjugation is a highly efficient method of DNA transfer, with the pilus formed  
34 between donor and recipient cells protecting transferred DNA from the external environment [18]. This  
35 has enabled conjugation to transfer elements across a broad range of bacterial taxa [19–21], which seems  
36 the most likely explanation as to how antibiotic resistance genes originally entered the *S. pneumoniae*  
37 population.

38 The most important ICE driving the spread of antibiotic resistance in pneumococci is Tn916, which  
39 was the first ICE to be discovered [22,23]. This element confers tetracycline resistance via the *tetM*  
40 gene, and also forms composite elements that can confer resistance to macrolides, aminoglycosides,  
41 streptogramins and lincosmides through the integration of sequences such as the Mega cassette, Omega  
42 cassette and Tn917 elements [24]. Tn916-type elements are present in antibiotic-resistant pneumococci,  
43 and also appear in the majority of antibiotic-resistant bacterial pathogens considered a priority by the  
44 WHO [20,23,25]. However, the distribution of Tn916 in *S. pneumoniae* is a particular puzzle, as *in*

45 *in vitro* studies have shown it appears unable to conjugate between pneumococci, although pneumococci  
46 themselves can be donors to other streptococci [26,27]. The short cassettes that integrate into Tn916 also  
47 lack their own self-mobilisation machinery, which is even true for the longer form of the Mega cassette,  
48 Tn1207.1. Hence the contribution of conjugation to the spread of these ICE is not clear.

49 An alternative mechanism by which Tn916 might spread is transformation, which facilitates the uptake  
50 of extra-cellular DNA into cells which have reached a competent state [28]. Originally discovered in  
51 the pneumococcus, transformation is tightly controlled by the host cell, which encodes all the required  
52 machinery [28]. Imported DNA is then integrated into the chromosome via homologous recombination.  
53 However, there are two important limitations on the dissemination of MGEs between species through  
54 transformation.

55 The first is the inhibition of homologous recombination by sequence divergence, which limits the inte-  
56 gration of sequence from other species into host chromosomal DNA [29–32]. The decline is exponential  
57 as sequence divergence between the donor and recipient increases [33]. This is thought to result from  
58 the minimum effective processing segment (MEPS), the shortest length of continuous sequence identity  
59 required for efficient recombination, estimated to be 27 bp for pneumococci [32]. This barrier though,  
60 was not sufficient to prevent interspecies recombinations facilitating the emergence of beta lactam resis-  
61 tant pneumococci. This involved the formation of ‘mosaic’ versions of multiple genes encoding targets  
62 of beta lactam antibiotics (most commonly, *pbp1a*, *pbp2b* and *pbp2x*) that were a mixture of sequence  
63 from *S. pneumoniae* and the related oronasopharyngeal commensal streptococcal species, *Streptococ-*  
64 *cus mitis* and *Streptococcus oralis* [19, 34, 35]. The mosaicism reflected the imported fragments being  
65 much smaller than a typical gene, although there was also evidence of these recombinations causing  
66 diversification in the flanking regions of the chromosome [36].

67 The second limitation to the acquisition of an MGE through transformation, is that transformation  
68 requires the importation of both the intact locus and two flanking “homologous arms”, in which recom-  
69 bination crossovers can occur. Both arms must match the host chromosome, and no cleavage of the  
70 imported DNA must occur between them during its uptake into the cell. Hence the efficiency of uptake  
71 declines with the length of the inserted locus between the two arms [37]. Therefore, while *in vitro* studies  
72 have shown that interspecies transfer of MGEs via transformation is possible [38], these transfers were  
73 of a low frequency, and only spread shorter resistance cassettes. As such, transformation is thought to  
74 spread MGEs primarily through intraspecies transfer of already successfully inserted elements [39].

75 Therefore, although there are multiple mechanisms by which the MGEs may be acquired, their relative

76 contributions are not known. This is particularly challenging when antibiotic resistance loci are ubiquitous  
77 throughout a strain, as Tn916 is within many AMR *S. pneumoniae* lineages [10, 24, 40], making the pro-  
78 cess underlying the MGE's acquisition difficult to infer. Therefore we investigated two globally distributed  
79 pneumococcal lineages in which antibiotic resistance MGEs are common, but not conserved.

80 The first is the Spain<sup>9V</sup>-3, or PMEN3 lineage, which is within strain GPSC6 (clonal complex 156 by  
81 multi-locus sequence typing, MLST) [41]. PMEN3 was first documented in Spain in 1988 with a serotype  
82 9V capsule. It was later detected in France, the USA and South America [42–45]. By 2000, 55% of all  
83 penicillin resistant disease isolates in South America were from the PMEN3 lineage [45].

84 The second is the England<sup>14</sup>-9, or PMEN9 lineage, which is within strain GPSC18 (clonal complex 9  
85 or 15 by MLST). This was first described in the UK in 1996 and it has been isolated across Europe, the  
86 Americas and Asia [46–48]. PMEN9 was the most common lineage causing penicillin-resistant invasive  
87 pneumococcal disease (IPD) in the USA, and the most common lineage causing macrolide-resistant IPD  
88 in Germany, prior to the introduction of infant vaccination [49–51].

89 Both lineages exhibit variability in their resistance to tetracyclines and macrolides across countries,  
90 suggesting frequent acquisition or loss of elements such as Tn916 and Tn1207.1 [52–55]. Therefore we  
91 analysed the distribution of antibiotic resistance loci within these lineages, and then expanded the study  
92 across the species with the wider Global Pneumococcal Sequencing project (GPS) data [41, 56]. Using a  
93 mixture of genomic approaches, we assessed the distribution of antibiotic resistance loci, determined the  
94 mechanisms by which they were imported into these lineages, and characterized how these genotypes  
95 have adapted to local antibiotic use as they have spread globally.

## 96 **Methods**

### 97 **Bacterial isolates and DNA sequencing**

98 For the *S. pneumoniae* PMEN3 and PMEN9 datasets, isolates were collated across Europe (from the  
99 Nationales Referenzzentrum für Streptokokken, Germany; and the collections of Prof. de Lencastre),  
100 the Americas (from the collections of the CDC through the Global Strain Bank Project) and the Maela  
101 refugee camp in Thailand [57] (Table S1). These datasets had multi-locus sequence typing (MLST)  
102 data [58]. Therefore isolates of sequence type (ST) 156, and single locus variants thereof, could be  
103 selected as representatives of PMEN3 (or Spain<sup>9V</sup>-3); isolates of ST9, and single locus variants thereof,  
104 were selected as representatives of PMEN9 (or England<sup>14</sup>-9) [59]. This generated collections of 272 and

105 325 isolates for PMEN3 and PMEN9, respectively. Isolates that could be cultured were sequenced as  
106 paired-end 24-plex libraries on Illumina HiSeq 2000 machines, generating 75 nt reads. After comparing  
107 inferred serotypes from seroba v1.0.0 [60] and STs to those determined by the sample providers as  
108 described previously [24], and manually checking for signals of contamination, 215 PMEN3, and 263  
109 PMEN9, isolates were used in the described analyses. All data were submitted to the ENA, and accession  
110 codes are listed in Table S1.

111 These datasets were combined with isolates from the Global Pneumococcal Sequencing (GPS) project,  
112 which generated a database of 20,015 high-quality pneumococcal draft genome sequences from 33 coun-  
113 tries collected between 1991 and 2017 [41]. In total, 49.7% of these isolates were collected from locations  
114 before the PCV7 vaccine was introduced. The majority of isolates were sampled from cases of invasive  
115 pneumococcal disease (IPD) in children under the age of five. PMEN3 and PMEN9 corresponded to  
116 strains GPSC6 (454 isolates) and GPSC18 (312 Isolates) in this collection, respectively [61]. Hence the  
117 final dataset sizes were 669 for PMEN3 and 575 for PMEN9. Among these PMEN collections, 64.7%  
118 of isolates were collected before the PCV7 vaccine was introduced. WGS data from the 478 isolates  
119 not within the GPS collection are publically available in the EMBL Nucleotide Sequence Database (ENA;  
120 Project number PRJEB2255).

## 121 **Generation of annotation and alignments**

122 De novo assemblies were generated using an automated pipeline for Illumina sequences [62]. Briefly,  
123 reads were assembled using Velvet with parameters selected by VelvetOptimiser. These draft assemblies  
124 were then improved by using SSPACE and GapFiller to join contigs [63–65]. The final assemblies were  
125 annotated using PROKKA [66].

126 Whole genome alignments were generated for phylogenetic analysis through mapping of short read  
127 data against reference sequences. For the PMEN3 and PMEN9 analyses, the reference genomes were  
128 *S. pneumoniae* RMV4 *rpsL\**  $\Delta$ *tvrR* (accession code: ERS1681526) [67] and INV200 (accession code:  
129 FQ312029.1) respectively. Mapping was performed using SMALT v0.64, the GATK indel alignment toolkit  
130 and SAMtools as described previously [32]. A more computationally-efficient approach was applied to  
131 the GPSCs defined from the GPS project. GPSCs with > 10 isolates present, were then aligned to a  
132 reference sequence. The reference was chosen as the isolate with the largest N<sub>50</sub> value (the length  
133 of the contig at the midpoint of the assembly, when contigs are ordered by size). Other isolates were  
134 mapped to this reference using SKA [68].

## 135 **Antibiotic consumption data:**

136 Selection pressures on specific clades was estimated using antibiotic consumption data from Europe.  
137 Consumption data for macrolides and penicillins was collected. Two sources were used for macrolides, a  
138 study looking at macrolide resistance among pneumococci isolates in Germany by Reinert *et al* 2002 [69],  
139 which has data from 1992 to 2000, and the European Centre for Disease prevention and Control (ECDC),  
140 which has data from 1997 to the present day. The macrolide usage data were combined using the three  
141 years of overlap between the two datasets as a scaling factor. This was the average transformation  
142 that mapped the Reinert *et al* 2002 data to the ECDC data. It was applied to convert the data from  
143 1992 to 1996 into the same units as the ECDC data (defined daily doses / 1000 population). The ECDC  
144 data for Germany is from the primary care sector for outpatients, with a population coverage of 90%,  
145 while the Reinert *et al* paper takes data from both prescriptions in hospitals and from community general  
146 practitioners.

147 For penicillin consumption, data was also taken from the ECDC for 1997 to present day. For penicillin  
148 consumption from 1992 to 1997 data was taken from McManus *et al* 1997 [70]. This has data on the  
149 hospital and retail sales of oral antibiotics in West Germany for the years 1989 and 1994 in the same  
150 DDD units as the ECDC data. A linear trend between 1989, 1994 and 1997, the first year of data from  
151 the ECDC, was used to impute the missing values between 1992 and 1997.

## 152 **Phylogenetic and phylodynamic analyses**

153 Gubbins v2.3 was used to identify recombinations and generate phylogenies for both the PMEN lineages  
154 and the GPSCs [71]. This was run for five iterations, with the first phylogeny constructed with FastTree  
155 2 [72], and subsequent iterations generating phylogenies with RAxML v8.2.8 [73], with a generalized time  
156 reversible (GTR) model of nucleotide substitution with a discretised gamma distribution of rates across  
157 sites.

158 Time-calibrated phylogenies were generated from the Gubbins outputs using the BactDating R pack-  
159 age v1.0.1 [74]. Isolates without dates of collection were pruned from the phylogeny, and the root-to-tip  
160 distances used to test for a molecular clock signal. Where one was detectable, BactDating was run with  
161 a relaxed clock model and a Markov chain Monte Carlo (MCMC) length of between 50 and 100 million  
162 iterations. Chain convergence was checked through visual inspection of trace plots.

163 The Skygrowth R package [75] was then used to formally test the link between antibiotic consump-

164 tion and population growth rates. The timed phylogeny generated by BactDating and the amalgamated  
165 macrolide consumption data were input into Skygrowth, with the MCMC run for 50 million iterations for  
166 analysis both including and omitting the macrolide usage data.

## 167 **Antibiotic resistance analyses**

168 The minimum inhibitory concentration (MIC) for penicillin had been determined for the majority of isolates  
169 in the PMEN3 and PMEN9 collections (65.5% and 80.9% respectively). The MICs of the remaining 341  
170 isolates were predicted using a random forest (RF) protocol developed in Li *et al* 2017 [76]. In this  
171 protocol, the Transpeptidase domains (TPD) of three penicillin binding proteins (PBPs; PBP1A, PBP2B  
172 & PBP2X) were extracted and each amino acid position used as a predictor to train an RF model on the  
173 continuous  $\log_2$  MIC value. The training data came from 4,342 isolates previously characterised by the  
174 CDC [77].

175 This model predicted the MIC for 340 of the 341 isolates with unknown MIC values, with the missing  
176 isolate having unidentifiable *pbp* genes. The continuous MIC values predicted by the model were then  
177 converted into categories based on the pre-2008 meningitis breakpoints for resistance, with an added  
178 intermediate class of isolates for those with  $0.06 \mu\text{g/l} < \text{MIC} < 0.12 \mu\text{g/l}$  [78].

179 This method was then used on the wider 20,015 GPS collection, with 59 isolates (0.3%) having uniden-  
180 tifiable *pbp* genes.

181 Resistance to sulfamethoxazole was detected using a hidden Markov model (HMM), constructed  
182 using HMMer3 [79], trained to extract the region downstream of S61 in *folP*. If this region contained at  
183 least one inserted amino acid, then the isolate was predicted to be resistant. Resistance to trimethoprim  
184 used an HMM to identify the amino acid at position 100 in *dhfr* (also known as *dyr* or *folk*). Isolates with  
185 an isoleucine at this position were predicted to be sensitive, and isolates with a leucine at this position  
186 were assumed to be resistant. If isolates were classified as resistant to both sulfamethoxazole and  
187 trimethoprim, they were also classified as resistant to the combination drug cotrimoxazole [80].

188 The code for both the penicillin prediction and co-trimoxazole prediction methods is available at  
189 [https://github.com/jdaeth274/pbp\\_tpd\\_extraction](https://github.com/jdaeth274/pbp_tpd_extraction).

## 190 **Ancestral state reconstruction**

191 The penicillin resistance categories inferred from the metadata and the RF model were reconstructed  
192 on the timecalibrated phylogeny using the phytools R package v0.7.7 [81]. The `make.simmap` function

193 was run using an equal rates model and an MCMC chain sampling every 100 iterations. The input was  
194 a matrix of character states for the tips as probabilities if the phenotype was inferred from the RF model;  
195 otherwise, observed phenotypes were assigned a probability of one. For the single tip with no data, the  
196 probabilities of each of the states was estimated from their proportions in the rest of the dataset.

197 Each node's state was assigned as that with the highest posterior probability. Starting at the root,  
198 the number of lineages of each state at each coalescent event in the time-calibrated tree was recorded.  
199 Every time a node was reached an extra lineage was added to the total. If there was no state change  
200 between two nodes the count for the state was increased by one; else if there was a state change the  
201 count for the new state was increased by two, given the strictly bifurcating nature of the timecalibrated  
202 tree. The total number and the proportion of branches in each state were recorded through time.

203 To assess the number of serotype switching events across the PMEN lineages, The JOINT Maximum  
204 Likelihood (ML) model for ancestral reconstruction of PastML v1.9.15 [82], was used.

## 205 **MGE identification**

206 Reference MGE sequences were used to search the PMEN3, PMEN9 and GPSCs for intact and partial  
207 representatives. For the Tn916 element, the 18 kb reference given by the transposon registry [83],  
208 extracted from *Bacillus subtilis* (accession code: KM516885), was used. For Tn1207.1, a 7 kb reference  
209 extracted from the *S. pneumoniae* INV200 genome (accession code: FQ312029.1) was used. BLASTN  
210 was used to detect Tn916 and Tn1207.1 among the assembled genomes in the collections, setting an  
211 empirically determined cutoff alignment length of 7 kb and 2 kb respectively for each element. BLASTN  
212 results were merged if they represented continuation of an element's sequence split across multiple  
213 contigs, to enable detection of elements in isolates that were fragmented in draft assemblies.

## 214 **MGE insertion site identification**

215 A pipeline was developed to categorise the insertion points of the elements and infer the node within a  
216 cluster's phylogeny at which the insertion occurred. Figure (1) outlines the algorithm. The initial step was  
217 the creation of a library of unique hits, with BLAST matches against the GPSC's reference determining  
218 the start and end points of an insertion. A hit was defined by three characteristics: (1) the total length of  
219 the delineated insertion; (2) the number of genes within the insertion, and (3) the genes within the flanking  
220 regions of a hit. Each observed combination of values was considered a unique hit. For instance, if two  
221 hits were of similar length and gene content, but differ in where they insert within the host, they were



222 treated as two unique hits. The unique insertions with the largest flanking matches to the reference,  
223 indicating the insert was reconstructed on a large contig, were used as representatives of that insertion  
224 within the library.

225 The next step was to allocate the remaining hits, which were not present in the library, to one of the  
226 unique library insertion types (the combination of gene number, insertion length and location). Isolates  
227 with no matches to reference either side of the hit, usually when the hit was present in a small contig,  
228 were discarded from the analysis.

229 Once hits had been allocated an insertion type, the node at which the insertion occurred was recon-  
230 structed on the Gubbins phylogeny for each GPSC. This ancestral state reconstruction was performed  
231 using PastML [82], as these phylogenies were not time-calibrated. The recombination predictions were  
232 then searched to detect whether there was a putative recombination event, on the branch on which ac-  
233 quisition was estimated to occur, spanning the insertion site within the reference for a GPSC. If there was  
234 a recombination event at this node, this was considered indicative of element insertion via homologous  
235 recombination. The flanking regions of the isolate with the fewest reconstructed SNPs around the inser-  
236 tion site of the element since its insertion, as inferred from the Gubbins base reconstruction, were then  
237 extracted to test for the origin of this element.

238 These flanking regions were compared to a reference collection of 52 streptococcal genomes collated  
239 from antimicrobial susceptible *S. pneumoniae* and other Streptococcus species, building on the database  
240 collated in Mostowy *et al* 2017 [84]. BLASTN was used to compare each flanking region to this database.  
241 The orthologous regions to these flanks were also extracted from isolates not containing the insertion, to  
242 act as a control.

243 The statistic  $\gamma$  was used to determine the species of origin for an insertion. This utilised the BLAST  
244 bit score, which is a normalized form of the raw score of an alignment, representing the size of the search  
245 space required to find a hit of a similar score. The  $\gamma$  statistic was calculated as the bitscore of the top  
246 ranked *S. pneumoniae* hit ( $b$ ) divided by the bitscore of the top ranked hit ( $B$ ):

$$\gamma = \frac{b}{B} \quad (1)$$

247 Hits where the top match was *S. pneumoniae*, indicating the insertion originated from an intraspecies  
248 transformation event, had a  $\gamma$  score of 1. Any score below 1 indicated a potential origin from outside of  
249 *S. pneumoniae*.

250 This pipeline was further modified to detect the origin of *pbp* genes involved in the acquisition of resis-  
251 tance. Here, using phenotype predictions from the RF model described above, ancestral node resistance  
252 states were reconstructed. The descendants of nodes where resistance was acquired or lost with the  
253 fewest SNPs in the three *pbp* genes then had their gene sequences extracted. These sequences were  
254 then compared to the reference database using BLASTN. The same  $\gamma$  statistic as above was used to  
255 detect the likely origin of these *pbp* genes. The code for both the altered *pbp* pipeline and the MGE  
256 detection pipeline is available at <https://github.com/jdaeth274/ISA>.

257 For *murM*, where the effect of alterations on resistance levels are less well understood, a different  
258 approach was taken. The regions corresponding to the *murM* genes in the annotated references were  
259 extracted from the PMEN3 and PMEN9 whole genome alignments. To enable the detection of pos-  
260 sible interspecies recombinations, *murM* sequences from *Streptococcus mitis* 21/39 (accession code:  
261 AYRR01000000) and *Streptococcus pseudopneumoniae* IS7493 (accession code: CP002925) were  
262 added to the dataset. All *murM* sequences were then aligned with Muscle v3.8.31 [85]. Sequences  
263 were clustered into lineages, and recombinations inferred, using fastGEAR [84].

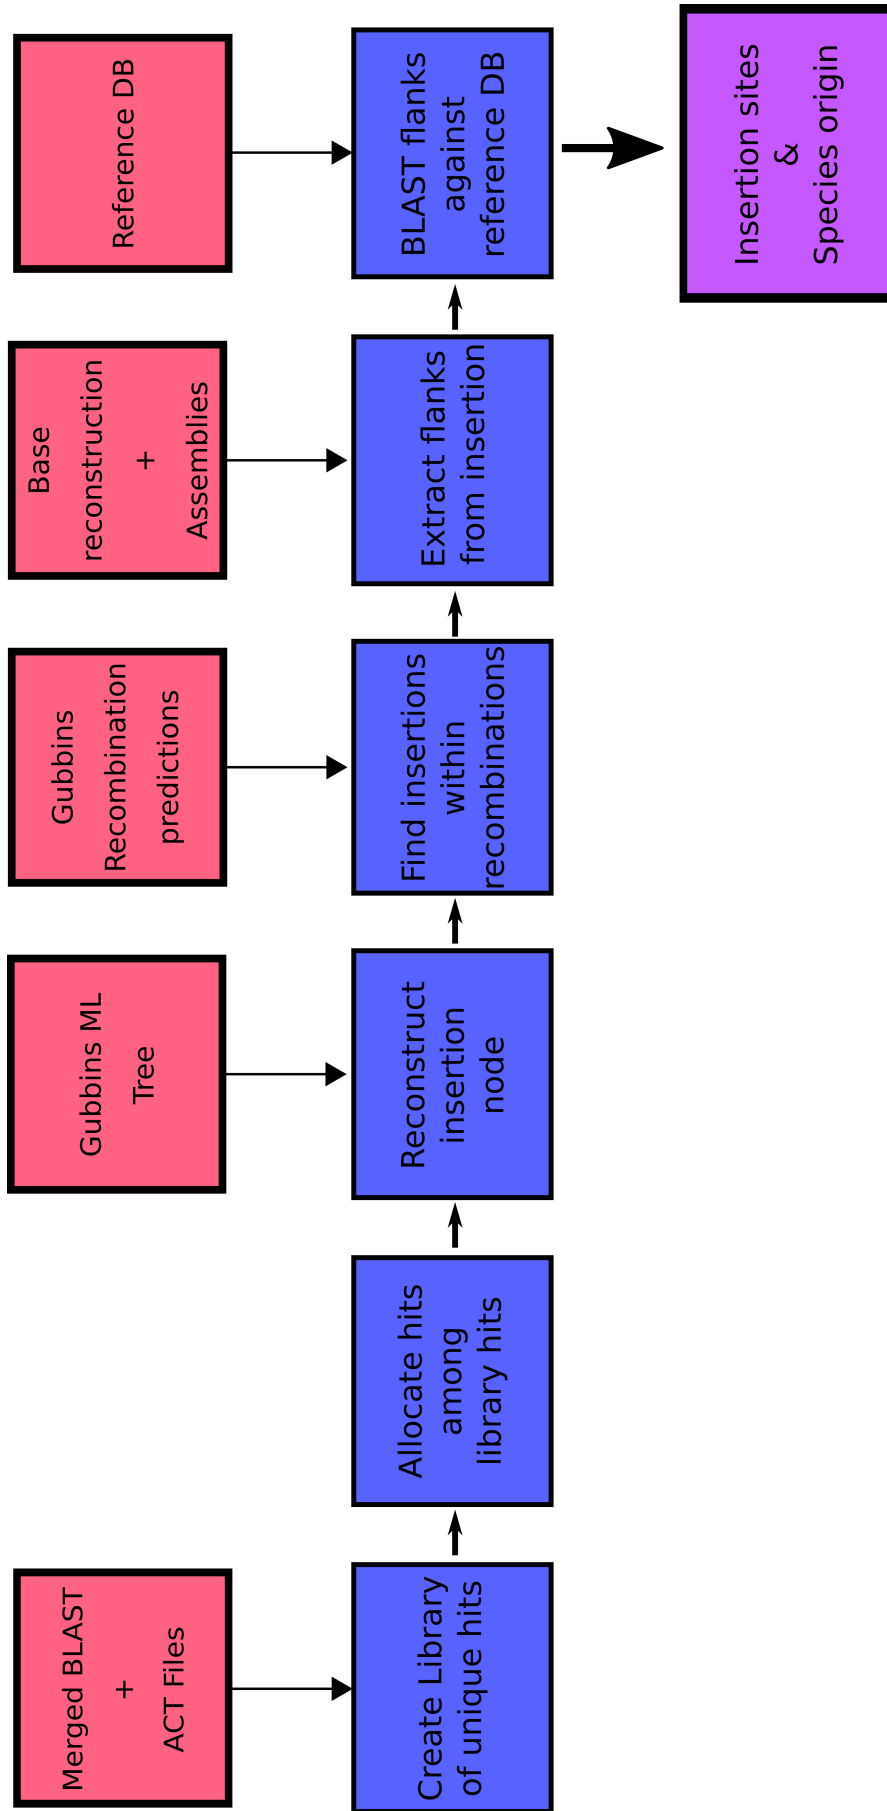

**Figure 1: Outline of insertion point pipeline.** Red boxes represent data input into the pipeline, blue boxes the individual analysis steps within the pipeline and purple the pipeline's output.

## 264 Results

### 265 Divergent genomic epidemiology of antibiotic-resistant pneumococci

266 Analysis of the PMEN3 and PMEN9 collections with Gubbins showed the lineages had distinct evolu-  
267 tionary and transmission histories. The phylogeny representing the evolution of PMEN3 was constructed  
268 from isolates of GPSC6, which were collected for 31 countries over 23 years (1992 to 2015; Figure 2).  
269 This range was sufficient for the estimation of a molecular clock (Figure 2-figure supplement 1). This  
270 estimated a root date of 1942 (95% credible interval of 1910 to 1959) and a molecular clock rate of 1.69  
271  $\times 10^{-6}$  substitutions per site per year (95% credible interval of  $1.52 \times 10^{-6}$  to  $1.86 \times 10^{-6}$  substitutions per  
272 site per year). The PMEN3 phylogeny is dominated by a single 491 isolate ST156 clade, which is found  
273 in 27 countries mainly from Europe (85 isolates), North America (90 isolates) and South America (192  
274 isolates). Most of these isolates are either of the ancestral serotype 9V, or serotype 14, with changes  
275 between these two serotypes accounting for 9 of 36 serotype switches reconstructed within the clade  
276 (Figure 2-figure supplement 2). Both of these serotypes were targeted by the PCV7 vaccine. However,  
277 there is a clade of 26 isolates of serotype 19A, not included in PCV7, from the USA with a most recent  
278 common ancestral node date of 2000 (95% credible interval of 1999 to 2001). This coincides with the  
279 date of PCV7's introduction into the USA, consistent with these switched isolates evading the vaccine  
280 and persisting until PCV13 (which includes 19A) was introduced [49]. In total 13 serotypes are found  
281 in the collection, of which seven (11A, 13, 15A, 15B/C, 23A, 23B & 35B) are not found in the PCV13  
282 vaccine. Hence a single PMEN3 clade has rapidly diversified its surface antigens as it has frequently  
283 disseminated between countries.

284 By contrast, the phylogeny representing the evolution of PMEN9, constructed from isolates of GPSC18,  
285 was split into multiple clades that are separated by deep branches (Figure 3). Even when excluding the  
286 outlying serotype 7C isolates, the only discernible molecular clock signal suggested this strain was cen-  
287 turies old (Figure 3-figure supplement 1). Despite this age, the largest clades generally remained confined  
288 to particular countries. The largest clade was associated with Germany (accounting for 166 of the 250  
289 isolates), with other representatives from Slovenia and China. Other clades were associated with the  
290 USA (accounting for 91 of the 98 isolates), South Africa (accounting for 68 of the of 73 isolates), and  
291 China (accounting for 18 of 45 isolates). All the isolates in the three largest clades express serotype 14,  
292 as do 93% of all isolates in this phylogeny. While in the Chinese clade, two monophyletic isolates had

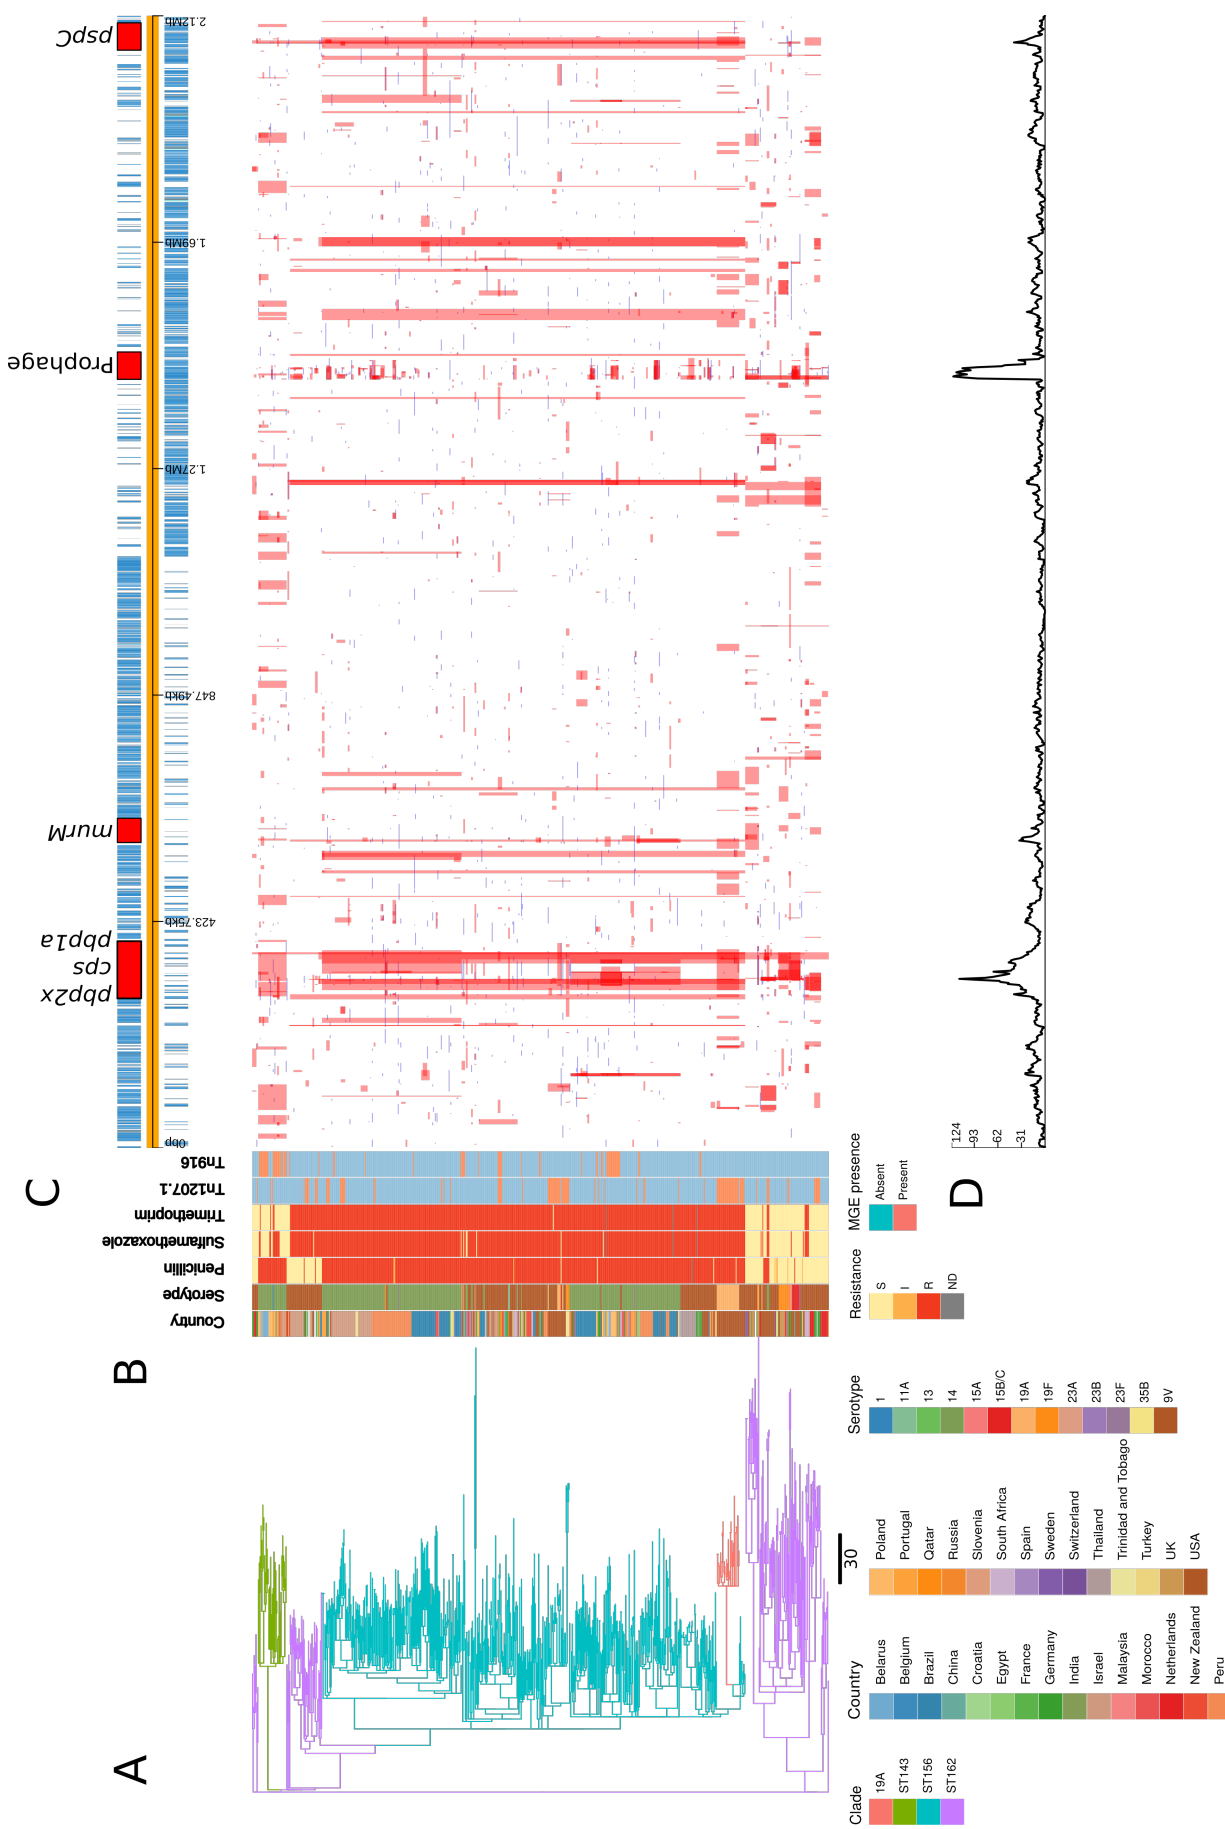

**Figure 2: Phylogenetic analysis of PMEN3 lineage.** (A) ML phylogeny of the non recombining regions of the PMEN3 collection. Branches are coloured by clade identified in the key. 699 isolates are present in the tree. Units for the scale bar are the number of point mutations along a branch. (B) Bars highlighting the country of origin, serotype, resistance categories to penicillin, trimethoprim and sulfamethoxazole and the presence of the MGEs Tn1207.1 and Tn916 among isolates. Bars map across to isolates on the phylogeny. (C) Simplified annotated genome of the PMEN3 reference isolate RMV4. Regions are highlighted in red. Blue bars represent individual genes annotated within the assembly. (D) Distribution of recombination events across the PMEN3 collection. Blue bars represent recombination events occurring on internal nodes in the tree, which are subsequently present in multiple isolates. These bars map across to isolates in the phylogeny in section A and map to regions in the genome annotated in section C. Blue bars indicate recombination events on terminal nodes of the tree, occurring in only one isolate. In the bottom half of the graph, the line represents the frequency of recombination events along the genome's length.

293 switched to 19F from serotype 14 and a further monophyletic pair had switched to 23F from 14. Only nine  
294 serotype switches were identified across GPSC18 (Figure 3-figure supplement 2). In total there were six  
295 serotypes present within the collection, only two of which (16F and 7C) were not found in the PCV13  
296 vaccine. Overall, there is little evidence of frequent intercontinental transmission or antigenic diversifi-  
297 cation with this set of isolates. Hence genomics suggests different histories for these lineages, despite  
298 them both being internationally disseminated antibiotic resistant *S. pneumoniae*, commonly expressing  
299 the invasive serotype 14, with identical sampling approaches.

### 300 **Variation in transformation rates and imported sequence properties**

301 The two lineages also differed in the patterns of recombination across their genomes. In the PMEN3  
302 reference genome, there is a high density of recombinations around a 45 kb prophage region, indicating  
303 frequent infection by phage. Exclusion of these recombination events allowed estimation of the overall  
304 ratios of base substitutions resulting from homologous recombination relative to point mutations ( $r/m$ ).  
305 Consistent with its more rapid serological diversification,  $r/m$  was higher in PMEN3 (13.1) than PMEN9  
306 (7.7).

307 This difference in  $r/m$  could be due to the two lineages differing in three ways: (i) in the number of  
308 recombinations, (ii) in the length of recombination events or (iii) in the sources of their recombination  
309 events, with more divergent sources increasing the  $r/m$ .

310 The first explanation partially accounted for the difference: there were 0.129 recombinations per point  
311 mutation in the PMEN3 reconstruction, compared to 0.093 per points mutation in PMEN9. Comparisons  
312 of the length distribution and SNP density of recombination events revealed further differences between  
313 the two lineages (Figure 4). PMEN3 generally imported sequence with a higher SNP density, with a  
314 median SNP density of 11.8 SNP/kbp of sequence imported, compared to PMEN9, which had a median  
315 SNP density of 9.3 SNP/kbp. Therefore, the difference in  $r/m$  between the two lineages reflects both the  
316 increased frequency of recombination in the PMEN3 lineage and the increased diversity of the imported  
317 sequence.

318 Several peaks of recombination within the chromosome correspond to loci likely under immune se-  
319 lection. In PMEN9, there is an elevated density of recombinations affecting the *psrP* gene, encoding  
320 the antigenic pneumococcal serine rich repeat surface protein. Additionally, the antigenic Pneumococcal  
321 Surface Protein C, encoded by *pspC*, is a recombination hotspot in both lineages. Both these genes are  
322 highly diverse in pneumococcal populations, and elicit strong immune responses from hosts [86].

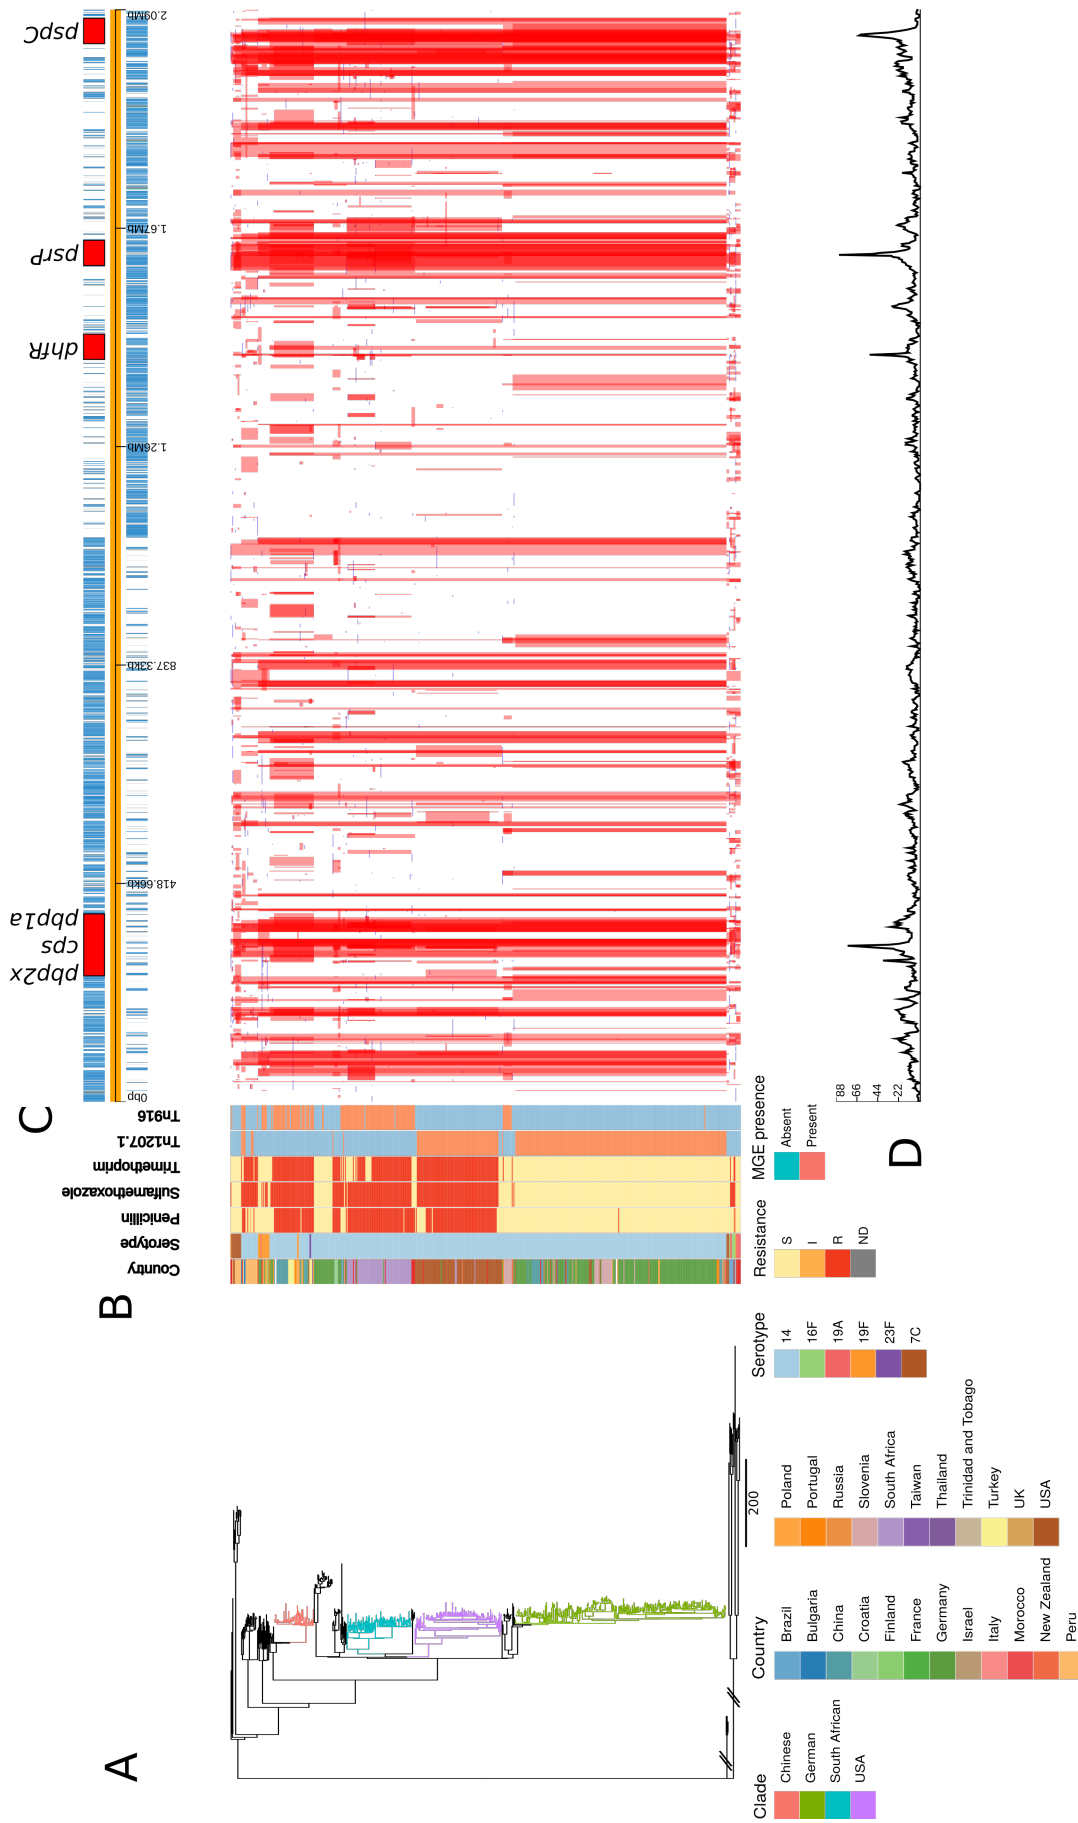

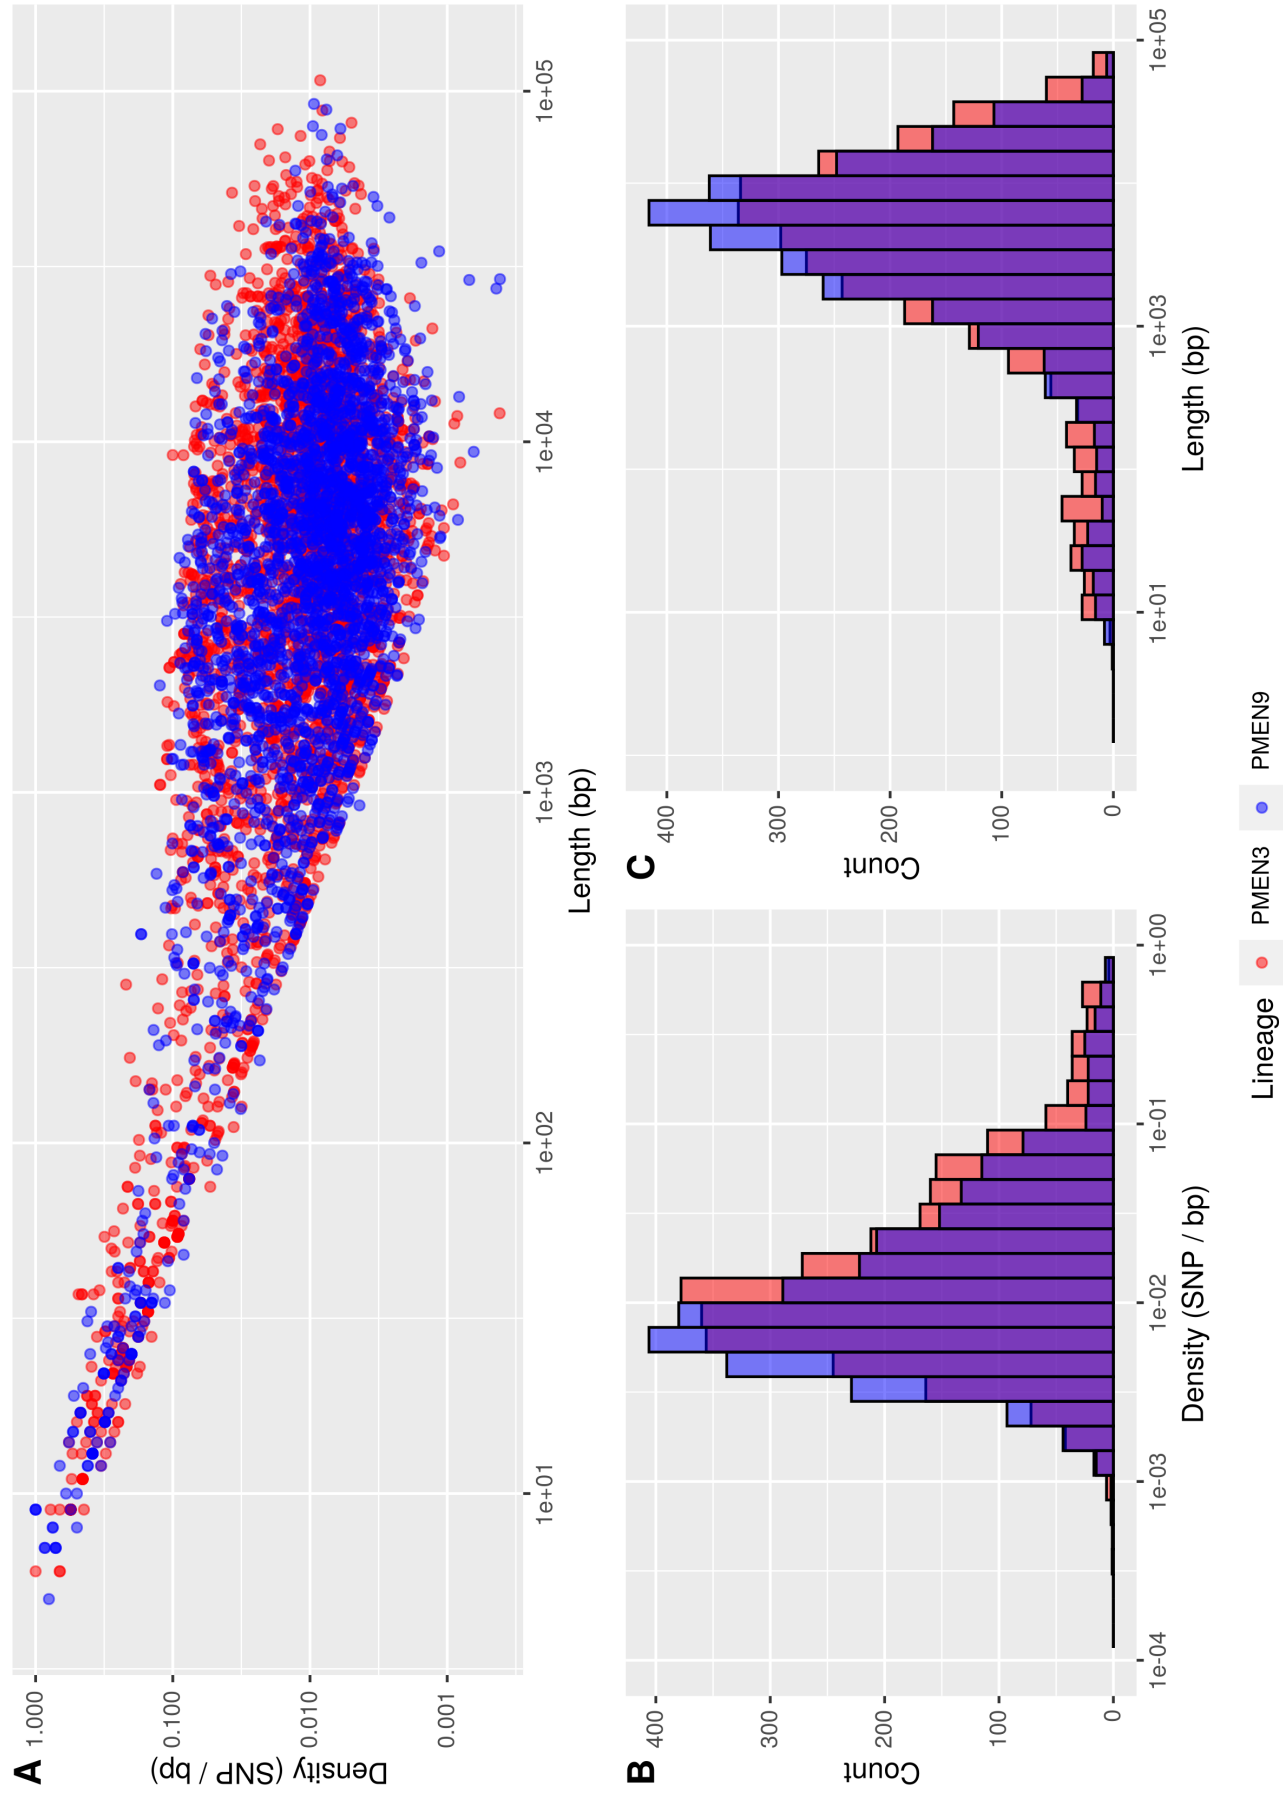

**Figure 4: Summary of recombination differences between PMEN3 and PMEN9.** **A** Plotting the SNP density against the Length of recombination events across the PMEN lineages. Dots represent individual recombination events and are coloured by Collection. **B** Overlaid histograms of the SNP density per recombination event in the PMEN collections. **C** Overlaid Histograms of the length of bases in each recombination event across the PMEN collections.



323 Both strains have large recombination hotspots at their *cps* loci, which determine an isolate's serotype.  
324 These loci undergo frequent recombination in the serologically diverse PMEN3, with fewer events at this  
325 locus in PMEN9. We tend to observe large recombination blocks around these loci, spanning the regula-  
326 tory gene *wcjG* and the *wze*, *wzd*, *wzh* and *wzg* modulatory genes [31,87] (Figures 2-figure supplement 2  
327 & 3-figure supplement 2). Within PMEN3, for switches from 9V to 14, the median recombination block size  
328 across the 20 kb *cps* locus was 26.5 kb in length. These recombination blocks frequently encompassed  
329 the *pbp1a* and *pbp2x* genes involved in penicillin resistance. In PMEN9, three of the seven recombina-  
330 tion events causing serotype switches spanned either *pbp1a* or *pbp2x*; this proportion increased to over  
331 75% (26 of the 34) of the recombinations associated with a serotype switch in PMEN3.

### 332 **Emergence of beta lactam resistance through interspecies transformation**

333 Penicillin resistance was predicted using a RF model on the PBP TPDs (see Methods), which categorized  
334 isolates using the pre-2008 CLSI meningitis resistance breakpoints (Figure 5-figure supplement 1). In  
335 the PMEN9 collection, 62% of isolates were susceptible to penicillin (recorded or predicted MIC  $\leq$  0.06  
336  $\mu\text{g/ml}$ ; Figure 3). However, 78% of the PMEN3 collection was classed as resistant (MIC  $\geq$  0.12  $\mu\text{g/ml}$ ),  
337 with 21% susceptible to penicillin, and the remaining 1% classified as intermediately resistant (0.06  $\mu\text{g/ml}$   
338  $<$  MIC  $<$  0.12  $\mu\text{g/ml}$ ; Figure 2).

339 Across the two PMEN lineages, there were 32 changes in resistance profile for penicillin. The most  
340 common alteration was acquisition of resistance by sensitive isolates, with 18 instances in the two col-  
341 lections (56% of events). There were also seven instances of resistant isolates reverting to penicillin  
342 sensitivity across the collections. In 21 of the 32 alterations in resistance profile, the evolutionary recon-  
343 struction identified at least one of the three resistance-associated *pbp* genes was altered by a concomitant  
344 recombination event.

345 In PMEN3, the spread of penicillin resistance was reflected by the expansion of the ST156 clade,  
346 98% of which was penicillin resistant. Recombinations altered *pbp1a*, *pbp2b* and *pbp2x* at the base of  
347 this clade (Figure 2).

348 Combining the time calibrated phylogeny with the ancestral state reconstruction of penicillin resis-  
349 tance showed the penicillin-resistant proportion of GPSC6 increased throughout the early 1980s with the  
350 expansion of the ST156 clade, which originated in 1984 (95% credible interval 1981 to 1986) (Figure 5).  
351 This expansion of resistant lineages continues until the early 2000s, when it appears to plateau within  
352 the strain from roughly 2010 onward.

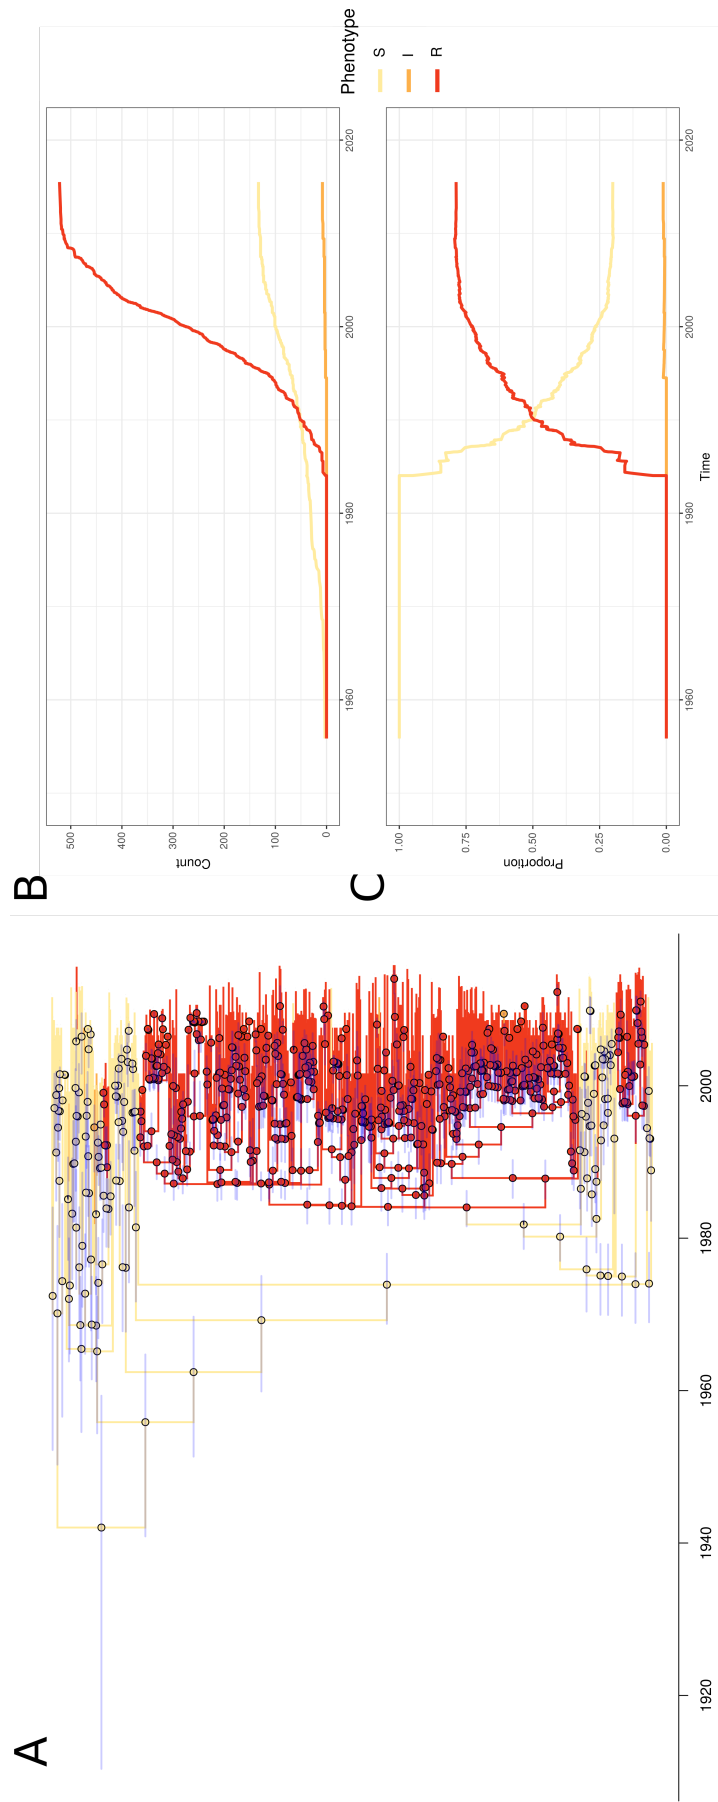

**Figure 5: PMEN3 resistant lineages through time A.** Time calibrated phylogeny of PMEN3. Branches are coloured by inferred resistant state. Pie charts present at nodes represent the probability of each state. Blue bars across the nodes represent the 95% credible interval for the age of the node. **B** The reconstructed absolute number of branches per resistant phenotype through time. **C** The proportion of total branch over time in either of the four states.

353 The highest MICs within the ST156 clade (up to 8  $\mu\text{g/ml}$ ) were associated with the vaccine-escape  
354 19A clade of isolates from the USA (Figure 5-figure supplement 2). This reflects a 53 kb recombination  
355 spanning the *cps* locus, which caused the alteration in serotype, also spanning *pbp1a* and *pbp2x* (Figure  
356 2-figure supplement 2). Hence the PCV7-escape recombination also reduced susceptibility to antibiotics.  
357 The converse situation was observed for a single ST156 clade member that had reverted to susceptibility.  
358 A 53 kb recombination event, causing a switch from serotype 9V to 15B/C (Figure 2-figure supplement 2),  
359 also restored the ancestral, susceptible versions of *pbp2x* and *pbp1a*. Conversely, in PMEN9, penicillin  
360 resistance emerged independently in different locations. The USA and South African clades appear to  
361 have gained resistance independently. There are 12 recombination events on different branches across  
362 the clade spanning *pbp2x* for these highly resistant US isolates (Figure 5-figure supplement 2). The  
363 largest of these imports 4.7 kb of sequence. Around the *pbp1a* gene there is also one large 12 kb  
364 recombination event. While for the *pbp2b* gene, there is 4.4 kb recombination spanning the length of the  
365 gene. Alteration in the *pbp2x* and *pbp2b* genes are the first steps towards resistance, although isolates  
366 with solely a mosaic *pbp2x* gene have been found to be resistant to penicillin [88].

367 As penicillin resistance was originally demonstrated to involve the acquisition of sequence from related  
368 commensal streptococci [34, 35, 89], the origin of these *pbp* genes within recombination events was  
369 analysed with a simple statistic,  $\gamma$  (see Methods). This had a value of one, if a recombination was likely  
370 to originate within *S. pneumoniae*, else was lower, if it came from a donor of a related species. Across  
371 the gains of resistance from penicillin sensitivity, the median  $\gamma$  score for *pbp1a* was 1.0, while for *pbp2b* it  
372 was 0.94 and for *pbp2x* it was 0.72. This pattern also applied to the emergence of ST156 (*pbp1a* = 1.0,  
373 *pbp2b* = 0.92 & *pbp2x* = 0.62), suggesting the *pbp2x* and *pbp2b* loci were most affected by recombination  
374 with non-pneumococcal streptococci. As a control, the  $\gamma$  score for the *pbp1a* and *pbp2x* genes was 1.0  
375 for the reversion to penicillin susceptibility within ST156 (*pbp2b* was not present within a recombination  
376 block for this alteration).

377 Isolates from a further 146 GPSCs were also analysed for the origin of their *pbp* genes. Penicillin  
378 resistance levels across the whole GPS collection were estimated using the RF method as described  
379 for the MDR collections (see Methods). 19,956 of 20,015 (99%) isolates had successful predictions for  
380 penicillin resistance phenotype. The majority of isolates, 64%, were susceptible to penicillin, while 30%  
381 were classified as resistant and the remaining 5% intermediately resistant. Ancestral state reconstruc-  
382 tions across these strains identified 300 alterations in penicillin resistance levels. The most common  
383 changes were susceptible to resistant, occurring 123 times (41%), and susceptible to intermediately re-

384 sistant, which occurred 85 times (28%). In total, 160 of the 300 alterations (53%) were associated with an  
385 inferred recombination event affecting at least one of *pbp1a*, *pbp2b* or *pbp2x*. The *pbp2x* gene was most  
386 frequently identified as being altered by recombination, occurring in 87 of the 160 alterations associated  
387 with a recombination.

388 As is the case with the PMEN lineages, the emergence of resistance from susceptible genotypes was  
389 associated with at least fragments of the *pbp2x* and *pbp2b* genes often being imported from other species  
390 (indicated by  $\gamma < 1$ ; Figure 5-figure supplement 3). The median  $\gamma$  score for *pbp2b* was 0.96 with *pbp2b*  
391 having a  $\gamma$  score  $< 1$  in 23 gains of resistance. While the median  $\gamma$  score for *pbp2x* was 1, there were 15  
392 gains of resistance where  $\gamma$  is  $< 1.0$ . The median  $\gamma$  score of *pbp1a* was 1, with only one instance where  
393 its score was  $< 1.0$ . However, where resistant isolates reverted to susceptibility, across all three genes  
394 the median  $\gamma$  score was 1.0, indicating within species recombinations could drive loss of resistance.

### 395 **Evolution of resistance through recombination at other core loci**

396 In PMEN3, there were further peaks in recombination frequency around the *murM* gene, which encodes  
397 an enzyme involved in cell wall biosynthesis [90], and has also been implicated in mediating penicillin  
398 resistance [7, 91]. Yet compared to the *pbp* genes, the relationship between *murM* modifications and  
399 penicillin resistance is much less precisely characterised. Therefore an alignment of the *murM* sequences  
400 was analysed with fastGEAR [84] to identify any patterns of sequence import from related species that  
401 may be associated with penicillin resistance (Figure 5-figure supplement 4). This revealed evidence  
402 of recombination with *S. pseudopneumoniae* and *S. mitis* at *murM* in both lineages. However, only one  
403 modification, affecting the region 946 bp to 1143 bp within *murM*, was associated with high-level penicillin  
404 resistance. This alteration was observed in both the PMEN9 USA clade and the PMEN3 19A clade, which  
405 exhibited the highest penicillin MICs in the two datasets (Figure 5-figure supplement 2).

406 In PMEN9, there is a high density of recombination events affecting the *dhfr* gene, the sequence of  
407 which determines resistance to trimethoprim, one of the two components (along with sulfamethoxazole)  
408 of co-trimoxazole [92]. However, PMEN9 is largely trimethoprim and sulfamethoxazole susceptible, with  
409 60% and 54% of isolates predicted to be susceptible respectively (Figure 3). Yet, within the South African,  
410 Chinese and USA clades there are high levels of resistance to both trimethoprim and sulfamethoxazole.  
411 Within the South African clade, 99% are resistant to sulfamethoxazole, 77% are resistant to trimethoprim  
412 and 77% resistant to cotrimoxazole, in the USA clade 94% of isolates are resistant to all three and in  
413 the Chinese clade all isolates are resistant to all three. Within South Africa, these high resistance levels

414 could be driven by widespread co-trimoxazole use, as it is commonly used as a prophylactic treatment  
415 against secondary infections in HIV positive individuals [93].

416 Trimethoprim and sulfamethoxazole resistance was much more widespread among the PMEN3 col-  
417 lection. In total 80% of isolates within PMEN3 were trimethoprim resistant and 81% were sulfamethox-  
418 azole resistant (Figure 2). This spread was mainly driven by the expansion of the ST156 clade, which  
419 inherited alleles conferring these resistance phenotypes. By contrast, within the ST143 clade, only 12%  
420 of isolates are trimethoprim resistant and 36% are sulfamethoxazole resistant. The 15 isolates from South  
421 Africa in the collection are all resistant to both trimethoprim and sulfamethoxazole. Hence co-trimoxazole  
422 resistance spreads through clonal expansion in both lineages, albeit to a much greater extent in PMEN3.

423 Levels of resistance to trimethoprim and sulfamethoxazole were high across the GPS collection.  
424 A majority of isolates were resistant to sulfamethoxazole (11,576 of 20,015; 58%), with fewer isolates  
425 resistant to trimethoprim (7,765 of 20,015; 39%). The combination of resistances, conferring full co-  
426 trimoxazole resistance, was identified in 7,661 isolates (38%).

#### 427 **MGE spread among MDR collections**

428 Other antibiotic resistance phenotypes are determined by acquired genes, rather than alterations to the  
429 sequences of core genes. Two resistance associated MGEs were widespread in PMEN3 and PMEN9:  
430 Tn916, an ICE encoding *tetM* for tetracycline resistance; and Tn1207.1, a transposon encoding a *mef(A)/mel*  
431 efflux pump causing macrolide resistance [16, 94].

432 Tn916 was present in 70 representatives of GPSC6 (PMEN3) (Figure 2). An ancestral state recon-  
433 struction identified 17 independent insertions. Only two spread to a notable extent: one was a clade of  
434 22 isolates within the ST156 clade, and the other was ST143. However, there were multiple instances  
435 of Tn916 being lost, by five and 13 isolates in each clade, respectively. In PMEN9, Tn916 was present  
436 in 150 isolates (Figure 3). The most common was in the South African clade, where Tn916 was found in  
437 71 of the 73 isolates in this clade, with likely deletion in two isolates. Similarly, 40 of the 45 isolates within  
438 the Chinese clade had also acquired Tn916, with five isolates without the element appearing to have lost  
439 Tn916 independently. There was also a smaller insertion in 10 isolates outside the German clade, and  
440 then further sporadic insertions of Tn916 around the phylogeny.

441 Tn1207.1 was more common in both strains. It was found in 108 isolates of PMEN3 (Figure 2),  
442 resulting from 27 independent insertions. The two insertions associated with the largest clonal expansions  
443 were one within the 19A subclade (26 isolates), and a second in another subclade of the ST156 clade (25

444 isolates). The other 25 insertions were less successful, appearing sporadically around the phylogeny. In  
445 PMEN9, Tn1207.1 was present in 341 isolates (Figure 3). The element was present in 92 isolates of a  
446 subclade of the USA clade, and ubiquitous in the 238 isolates of the German clade, the most successful  
447 insertion observed in the collection

448 Hence both elements were acquired on multiple occasions by both lineages, suggesting frequent  
449 importation. However, few of these insertions resulted in internationally disseminated antibiotic resistant  
450 pneumococcal genotypes.

### 451 **Selection for local expansion of macrolide resistant *S. pneumoniae***

452 The expansion of the German clade carrying Tn1207.1 represented an unusual case of an MGE insertion  
453 being associated with a successful genotype. This suggested strong selection for a macrolide resistant  
454 genotype in Germany in recent years. However, German antibiotic consumption is generally low relative  
455 to the rest of Europe. Notably, the German PMEN9 clade is penicillin susceptible. Based on macrolide  
456 and penicillin consumption data for the period from 1992 to 2010, Germany has a high ratio of macrolide  
457 to penicillin usage relative to other European countries (Figure 6-figure supplement 1).

458 A phylodynamic analysis of the 162 German isolates in this clade was used to test whether this atypical  
459 pattern of antibiotic consumption could explain the success of the clade. There was significant evidence  
460 of a molecular clock, based on the correlation between the root to tip distance and the date of isolation  
461 for this clade ( $n = 162$ ,  $R^2 = 0.15$ ,  $p$  value  $< 1 \times 10^{-4}$ ) (Figure 6-figure supplement 2). This estimated the  
462 clade's most recent common ancestor (MRCA) existed in 1970. Generating a time calibrated phylogeny  
463 using BactDating suggested a relatively slow clock rate of  $5.5 \times 10^{-7}$  substitutions per site per year (95%  
464 credibility interval of  $4.5 \times 10^{-7}$  to  $6.6 \times 10^{-7}$  substitutions per site per year).

465 The Skygrowth package was then used to reconstruct the effective population size,  $N_e$ , and the growth  
466 rate of  $N_e$  through time of this clade. The antibiotic usage data over this period was used as a covariate,  
467 to test for evidence of selection by changing consumption (Figure 6). All these isolates are serotype 14,  
468 which is included in the PCV7 vaccine that was introduced into the universal vaccination programme for  
469 children under two years of age in Germany in 2006 [95]. As such, only isolates collected pre-2006 were  
470 included in this analysis, to minimise any effect of the vaccine on  $N_e$ .

471 From the reconstruction without using the macrolide to penicillin data, we can see that this lineage  
472 expanded rapidly during the late 1990s and early 2000s, with its peak in growth rate around 1997 pre-  
473 ceding a peak in  $N_e$  around 2003. Following this peak there is a decline in both  $N_e$  and growth rate.

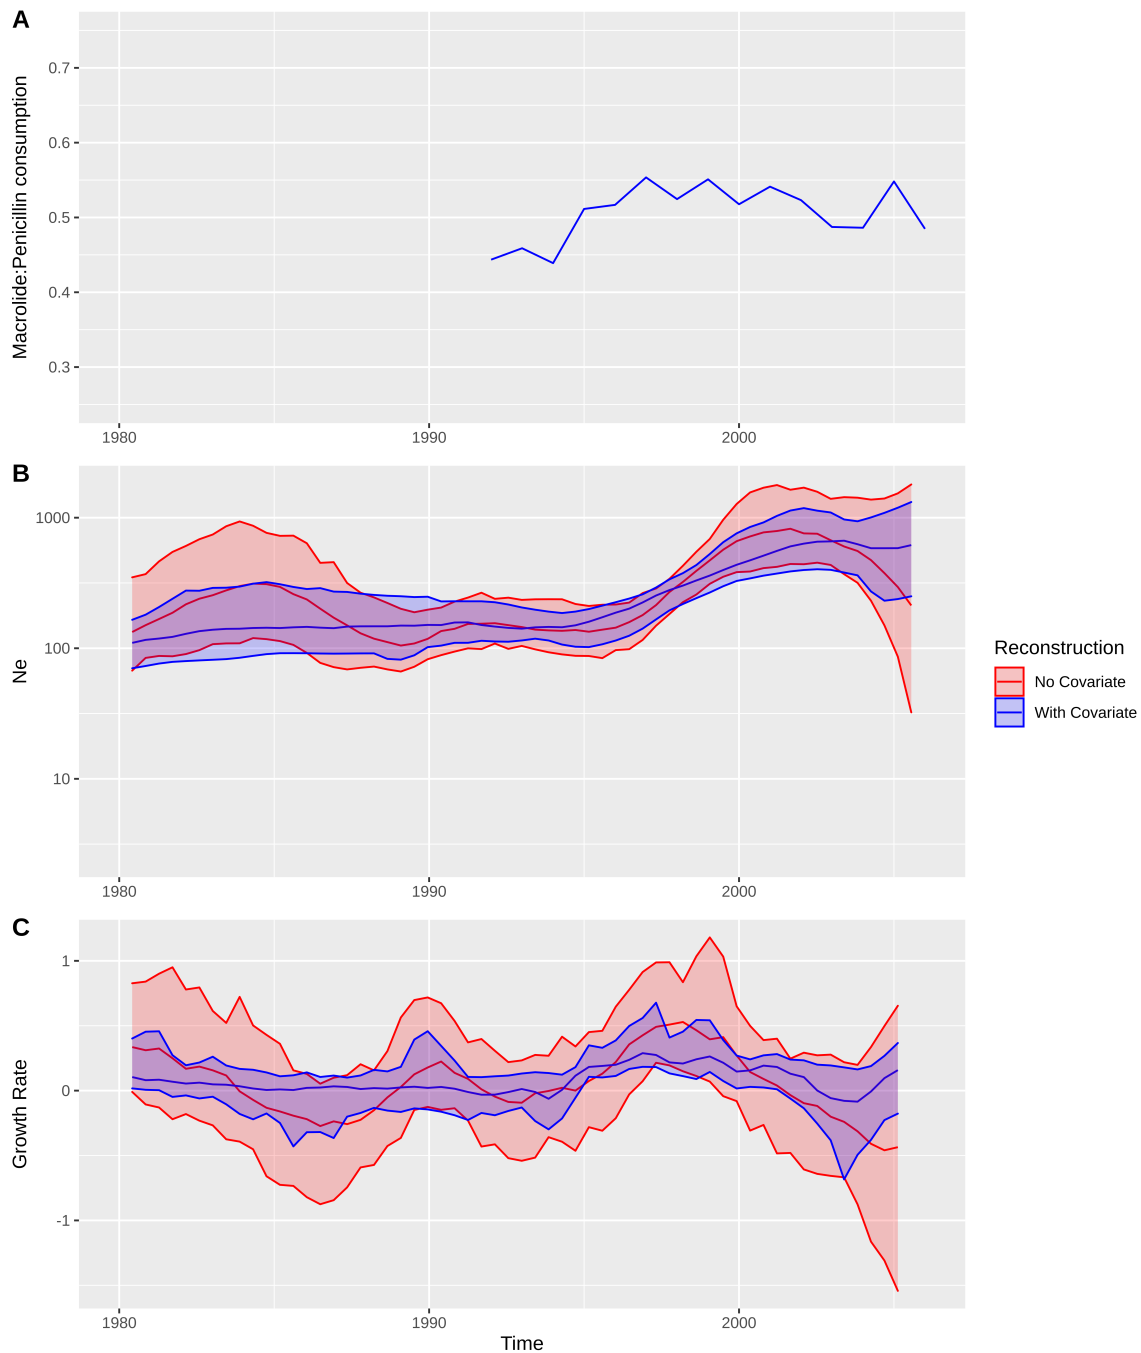

**Figure 6: Expansion of a macrolide resistant clade in Germany pre-vaccine.** **A** The ratio of macrolide to penicillin consumption in Germany. **B** The change in  $N_e$  through time inferred by skygrowth, with the red line representative of when no covariates are incorporated and the blue line when macrolide use is incorporated into the reconstruction. Shaded regions represent the 95% credible intervals. **C** The reconstruction of the growth rate of  $N_e$  through time. The red line representative of when no covariates are incorporated, and the blue line when macrolide consumption data are incorporated. Shaded regions represent the 95% credible interval for the reconstruction.

474 When incorporating macrolide consumption data into the reconstruction, we do observe a narrowing of  
475 the credible intervals for the growth rate estimation, which is indicative of the macrolide to penicillin usage  
476 being informative. Indeed, macrolide usage has a significant positive mean posterior effect of +0.21 [95%  
477 confidence interval 0.015 to 0.50] on the growth rate of the clade [75]. This supports the hypothesis that  
478 growth rate is correlated with the consumption of antibiotics, which is consistent with selection pressures  
479 from national-level prescribing practices driving the expansion of this clade. The peak of the macrolide  
480 to penicillin consumption ratio is in the mid-to-late 1990s, whereas the peak  $N_e$  is not reached until after  
481 2000. Yet the growth rate of  $N_e$  peaks around when the consumption ratio is highest, consistent with  
482 observed trends in *Staphylococcus aureus*, suggesting the antibiotic use pattern drove an expansion of  
483 this clade in the late 1990s [75].

484 The absence of penicillin resistance, or vaccine evasion through serotype switching [96], may be  
485 a consequence of the Tn1207.1 element itself. This MGE inserted into, and split, the gene *comEC*  
486 (Figure 6-figure supplement 3), which encodes a membrane channel protein integral to extracellular DNA  
487 uptake during competence [97]. Therefore these cells were unable to exchange DNA via transformation,  
488 necessary for serotype switching and the acquisition of penicillin resistance alleles of the *pbp* genes [19].  
489 The impact of this insertion is evident from the absence of ongoing transformation within the German  
490 clade (Figure 3).

491 Analysis of the origin of this MGE, via analysing the flanking regions as for the *pbp* genes above,  
492 revealed a probable interspecies origin. The flanking regions immediately adjacent to the insertion have  
493 a low percent identity matched to other pneumococci of between 92% and 94% (Figure 6-figure supple-  
494 ment 3). The immediate upstream 500 bp region most closely matched to a *S. mitis* reference genome  
495 (accession code AFQV00000000). Therefore other acquisitions of the common MGEs, Tn1207.1 and  
496 Tn916, were analysed to determine whether they had also been recently imported from related commen-  
497 sal species.

### 498 **Multiple independent acquisitions of resistance genes in *S. pneumoniae***

499 We first identified the set of Tn916 and Tn1207.1 insertion sites in *S. pneumoniae*, using the 20,015  
500 genomes from the Global Pneumococcal Sequencing project. The genomes were searched for these two  
501 elements, and hits were categorised into unique insertion types to identify the genomic locus at which they  
502 integrated. The branch of the phylogeny on which these insertions occurred was then identified, allowing  
503 the determination of whether an element was gained via homologous recombination (see Methods).



504 At least one of the elements was found in 5,796 isolates (29%) across 146 different GPSCs. Of these,  
505 1,300 isolates contained both Tn1207.1 and Tn916 (6%). The Tn1207.1 element was found across 64  
506 GPSCs in 1,935 isolates (10%). The mean prevalence of Tn1207.1 in GPSCs in which it was present was  
507 16%. Of the 1,935 isolates containing the element, 1,743 (90%) had their insertion point reconstructed.  
508 The majority of the 192 isolates where the insertion point was not reconstructed had the Tn1207.1 el-  
509 ement present within a small contig with no flanking hits to the reference (104 of 197). There were 32  
510 unique reconstructed insertion types (a specific combination of MGE length and insertion location) of the  
511 Tn1207.1 element, spanning 22 different insertion loci (Figure 7). Some insertion loci were targeted by  
512 multiple insertion types. The loci surrounding the *rlmCD* gene, encoding a methyltransferase, was the  
513 most common target, with 7 different Tn1207.1 insertion types targeting this region. The most common  
514 insertion type was within a Tn916-like element, which occurred in 1,011 (58%) of the isolates. Hence the  
515 diversity of Tn1207.1 insertion types was relatively low, with a Simpson's diversity index of 0.63.

516 The next most common insertion type for Tn1207.1 was the 5.5 kb Mega version of the element  
517 inserting into, and splitting, *tag* [98]. The *tag* gene encodes a methyladenine glycosylase, involved in  
518 DNA base excision repair. This was present in 261 isolates (15% of identified hits) across 30 different  
519 GPSCs. This was also common in the PMEN collections, with Tn1207.1 within the USA clade of PMEN9  
520 being in the form of Mega splitting *tag* (Figure 7-figure supplement 1). The insertion of the 7.2 kb Tn1207.1  
521 element into *comEC*, as in the German PMEN9 clade, was the third most common, accounting for 5% of  
522 insertions in the GPS collection and appearing in 4 different GPSCs.

523 Contrary to the results for PMEN3 and PMEN9, Tn916 was more widespread than Tn1207.1 among  
524 the collection, present in 5,167 isolates across 134 of the 146 GPSCs. The mean prevalence for Tn916  
525 was 41% among GPSCs where it was present. Of these hits, 2,806 (54%) were not classifiable. This was  
526 primarily due to elements being present in contigs with no or very small matches back to the reference  
527 (1,239 isolates) and elements within clusters where all isolates contain the element (1,072), meaning  
528 there are no descendents of the genotype lacking the element, thereby preventing us inferring any re-  
529 combination by which it may have been imported. For the classifiable 2,361 (46%) isolates, there were  
530 a large number of reconstructed insertion types, with 222 unique library hits encompassing single Tn916  
531 element insertions and the wider Tn916 family of elements (Figure 8). This gives Tn916 insertion types  
532 a Simpson's diversity index of 0.94, indicating Tn916 is much more variable in how it integrates into the  
533 *S. pneumoniae* genome.

534 The joint top hits for Tn916 were insertions of the Tn916-like Tn2010 and Tn2009 elements that also

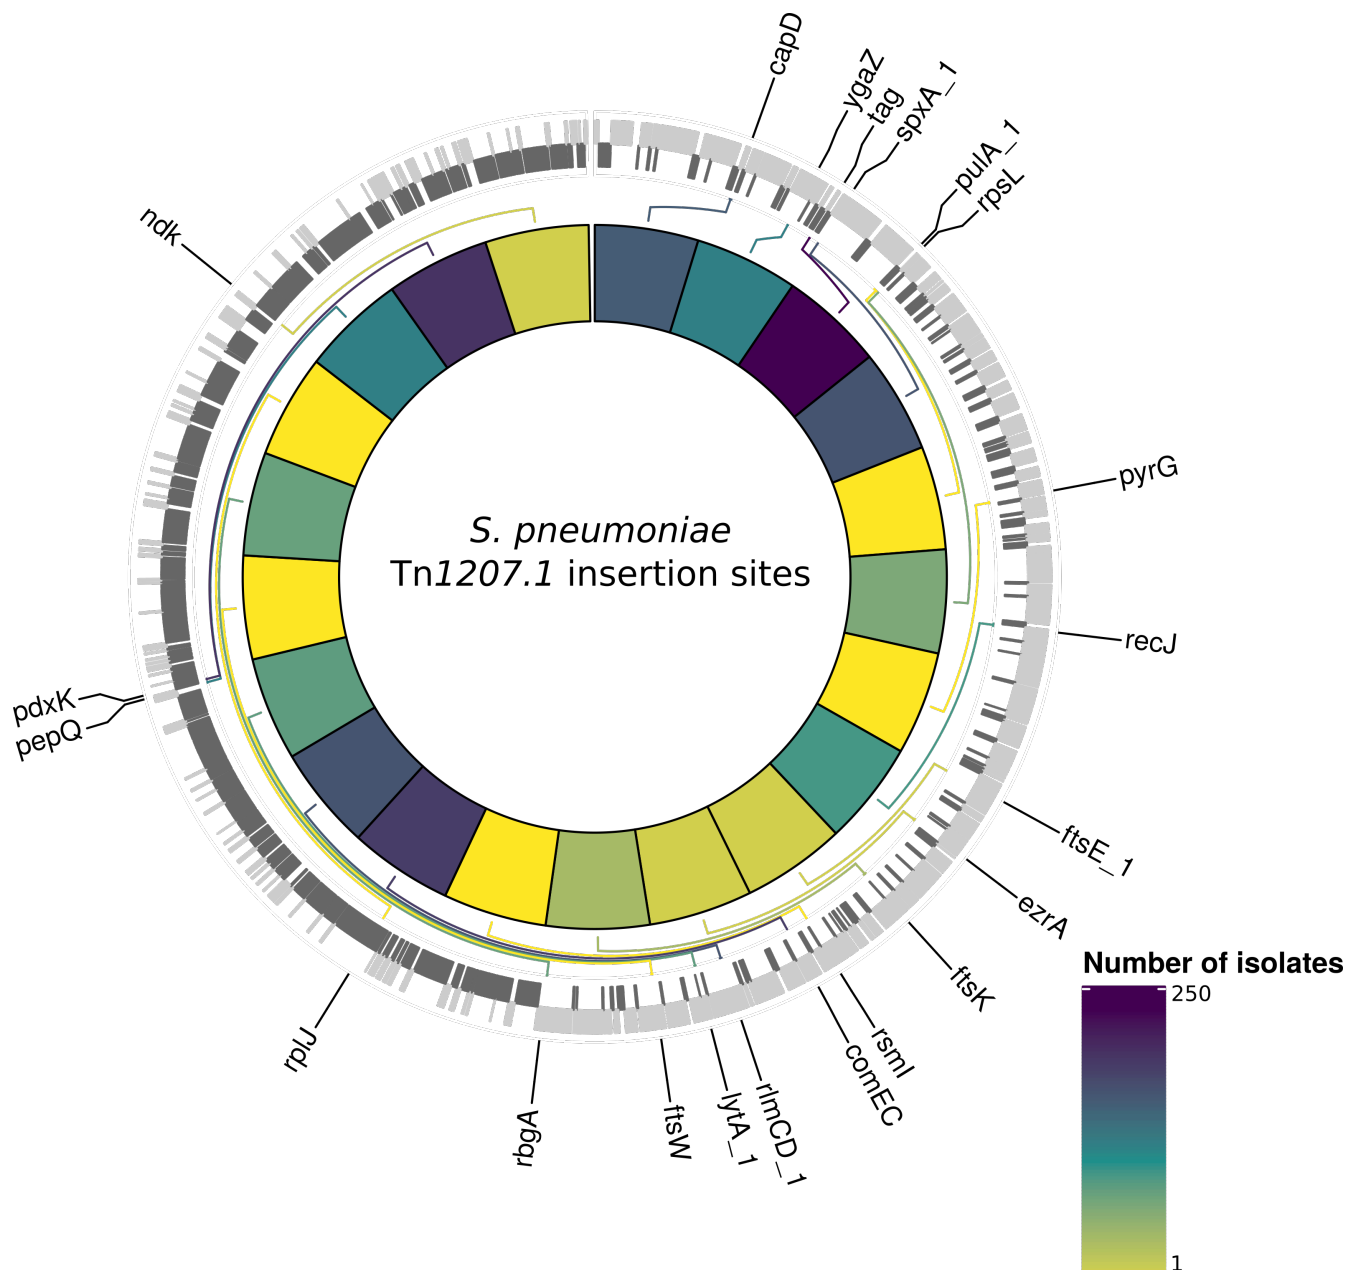

**Figure 7: Insertion points of classified Tn1207.1 hits within *S. pneumoniae*.** Annotated genome of the reference *Streptococcus pneumoniae* (ENA accession number: ERS1681526) with genes where Tn1207.1 has inserted either within or adjacent to among the collection. Only genes present within this element free reference are annotated. Grey bars represent coding sequences (CDS), lighter grey regions are CDS annotated in the forward strand, darker grey in the reverse. The inner heat map represents the number of isolates that have hits inserted within or adjacent to the annotated genes. The scale is log transformed.

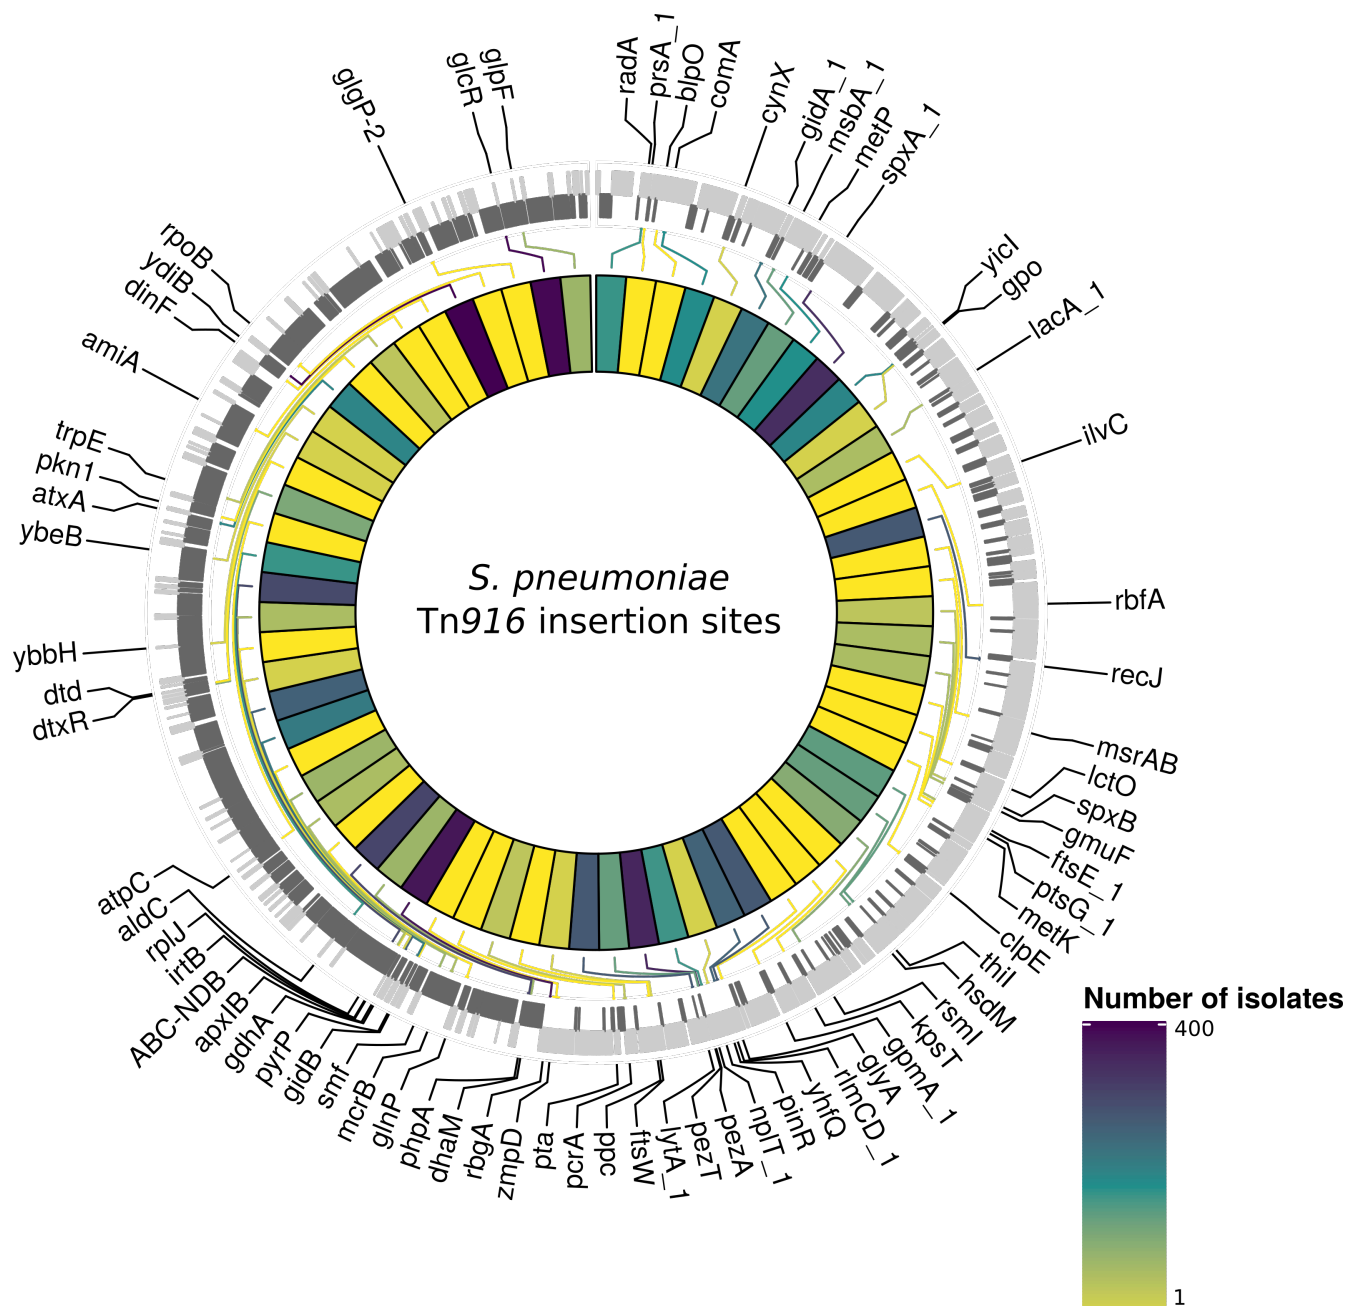

**Figure 8: Insertion points of classified Tn916 hits within *S. pneumoniae*.** Annotated genome of the reference *Streptococcus pneumoniae* (ENA accession number: ERS1681526) with genes where Tn916 has inserted either within or adjacent to among the collection. Grey bars represent coding sequences (CDS), lighter grey regions are CDS annotated in the forward strand, darker grey in the reverse. The inner heat map represents the number of isolates that have hits inserted within or adjacent to each of the annotated genes. The scale is log transformed.

535 contain the Mega form of Tn1207.1. Both insertions are present in 356 isolates each, with the majority of  
536 these occurring within the very common GPSC1 (PMEN14): 354 of Tn2010 and 351 of Tn2009 [40, 41].  
537 Other common Tn916 insertion types included a Tn6002 element, and a much larger 84 kb element  
538 containing Tn2009. Tn6002 consists of a Tn916 backbone with an *ermB* cassette between *orf20* and  
539 *orf19*. Tn6002 is present in 107 isolates within a single strain. The large 84 kb insertion is a composite  
540 of a Tn2009 and a  $\Omega$ cat element. This element thus confers tetracycline, macrolide and chloramphenicol  
541 resistance, and is present in 59 isolates, also solely within one strain. Tn916 is present in the 64.5 kb  
542 Tn5253 in eight isolates in the collection across four different GPSCs. In general Tn916 is present in  
543 elements over 50 kb in length in 660 isolates (28% of classifiable hits).

### 544 **Diverse insertion sites of MGEs**

545 Ancestral state reconstruction was used to identify the insertions of Tn916 and Tn1207.1 across the  
546 GPS collection. For Tn1207.1 there were 183 independent insertions of the element in its 32 identified  
547 hit types, across 55 GPSCs. The most frequent insertion type was the shorter 4.5 kb element splitting  
548 the *tag* gene, which was found to have inserted 73 times (40% of all insertions).

549 For Tn916 there were a much larger number of insertion events: 585 across 93 different GPSCs.  
550 Several insertion types appeared multiple times across the collection. The most frequent (21 times) was  
551 a 72 kb element, containing only *tetM* as a resistance gene inserted upstream of *rlmCD*. The second  
552 most frequent was a 50 kb element, also only containing *tetM* as an resistance gene. This inserted 20  
553 times around the collection, downstream of *zmpA* which encodes an immunoglobulin protease [99].

554 The numbers of insertions within putative recombinations differed between the two elements. For  
555 Tn1207.1, 64% of insertions were within recombination blocks (118 of 183), compared with only 9% of the  
556 insertions for Tn916 (53 of 585). This difference could be driven by a couple of factors. Tn916 encodes for  
557 its own conjugative machinery, and is often present within larger conjugative elements, and therefore may  
558 move independently of transformation. Alternatively, Tn916 may be imported through transformation, but  
559 then transpose between loci once in a cell, thus moving away from its site of insertion. The median  
560 Simpson's diversity index for within-GPSC Tn916 insertion site diversity was 0.41, whereas for Tn1207.1  
561 it was 0.02. This suggests Tn916, once inserted, is likely to be able to excise and transpose within the  
562 chromosome at higher rate than Tn1207.1.

563 Recombinations mediated by transformation are generally much shorter than the lengths of these el-  
564 ements (Figure 9), and such exchanges generally favour deletion of elements rather than insertion [37].

565 Comparisons of the length distribution and SNP density for recombination events that import one of the  
566 MGEs, against other recombination events, suggested they were atypical (Figure 9). MGE recombi-  
567 nations were significantly longer, with a median length of 11,797 bp, compared to a median length of 7,499  
568 bp for non-MGE recombinations and a median difference between MGE and non-MGE recombinations of  
569 3,828 bp (Mann-Whitney U test;  $U = 8634645$ ,  $n_1 = 157$ ,  $n_2 = 85262$ ,  $p = 3.178 \times 10^{-10}$ , 95% confidence  
570 interval 2600 to 5183 bp). Additionally, the median SNP density was significantly higher for MGE re-  
571 combinations, at 4.54 SNPs per kb, compared to non-MGE recombinations, with a median of 3.53 SNPs  
572 per kb and a median difference between the densities of 0.94 SNPs per kb (Mann-Whitney U test;  $U =$   
573  $8631593$ ,  $n_1 = 157$ ,  $n_2 = 85262$ ,  $p = 3.387 \times 10^{-10}$ , 95% confidence interval 0.66 to 1.27 SNPs per kb).

574 Given the pneumococcus tends to be conserved at core genome loci, the higher SNP density of these  
575 transformation events inserting MGEs suggested they may arise from donors of other species [61].

## 576 Interspecies origin of MGEs

577 Correspondingly, analysis of the flanking regions of MGE inserts reveals a large number of hits map-  
578 ping more closely to non-pneumococcal streptococci. For *Tn1207.1*, the median  $\gamma$  score was 0.89 for  
579 insertions across the flanking lengths and insertion types. For control isolates, where the element was  
580 not inserted and the orthologous flanking regions were extracted, the median  $\gamma$  score was 1.0. Hence  
581 this lower score for MGE flanks compared to homologous regions in isolates without the MGE, likely  
582 represents MGEs being acquired from other species. A Mann-Whitney U test also revealed significant  
583 difference between the control and MGE isolates  $\gamma$  scores for *Tn1207.1* ( $U = 2501856$ ,  $n_1 = n_2 = 3540$ ,  
584  $p < 2.2 \times 10^{-16}$ ), with the median difference between the MGE flanks score and the orthologous flanks  
585 score being -0.09 (95% confidence interval -0.1 to -0.08).

586 For *Tn916* insertions within recombination blocks, the median  $\gamma$  scores for both control and MGE  
587 isolates was 1. However, a Mann-Whitney U test revealed significant difference between the control and  
588 MGE isolates  $\gamma$  scores ( $U = 785412$ ,  $n_1 = 1524$ ,  $n_2 = 1520$ ,  $p < 2.2 \times 10^{-16}$ ), with the median difference  
589 between the MGE flanks score and the orthologous flanks score being  $-5.6 \times 10^{-5}$  (95% confidence  
590 interval  $-3.4 \times 10^{-5}$  to  $-5.0 \times 10^{-6}$ ).

591 The trends in top species match for flanking regions, over increasing flanking length, follow expecta-  
592 tions for interspecies transfers (Figure 10). The control flanking regions matched most closely to pneu-  
593 mococci at all tested lengths. For MGE insertion flanks, non-pneumococcal species matches were much  
594 more frequent closer to the insertion. As the flank length increased from 500 bp to 7500 bp, and linkage to

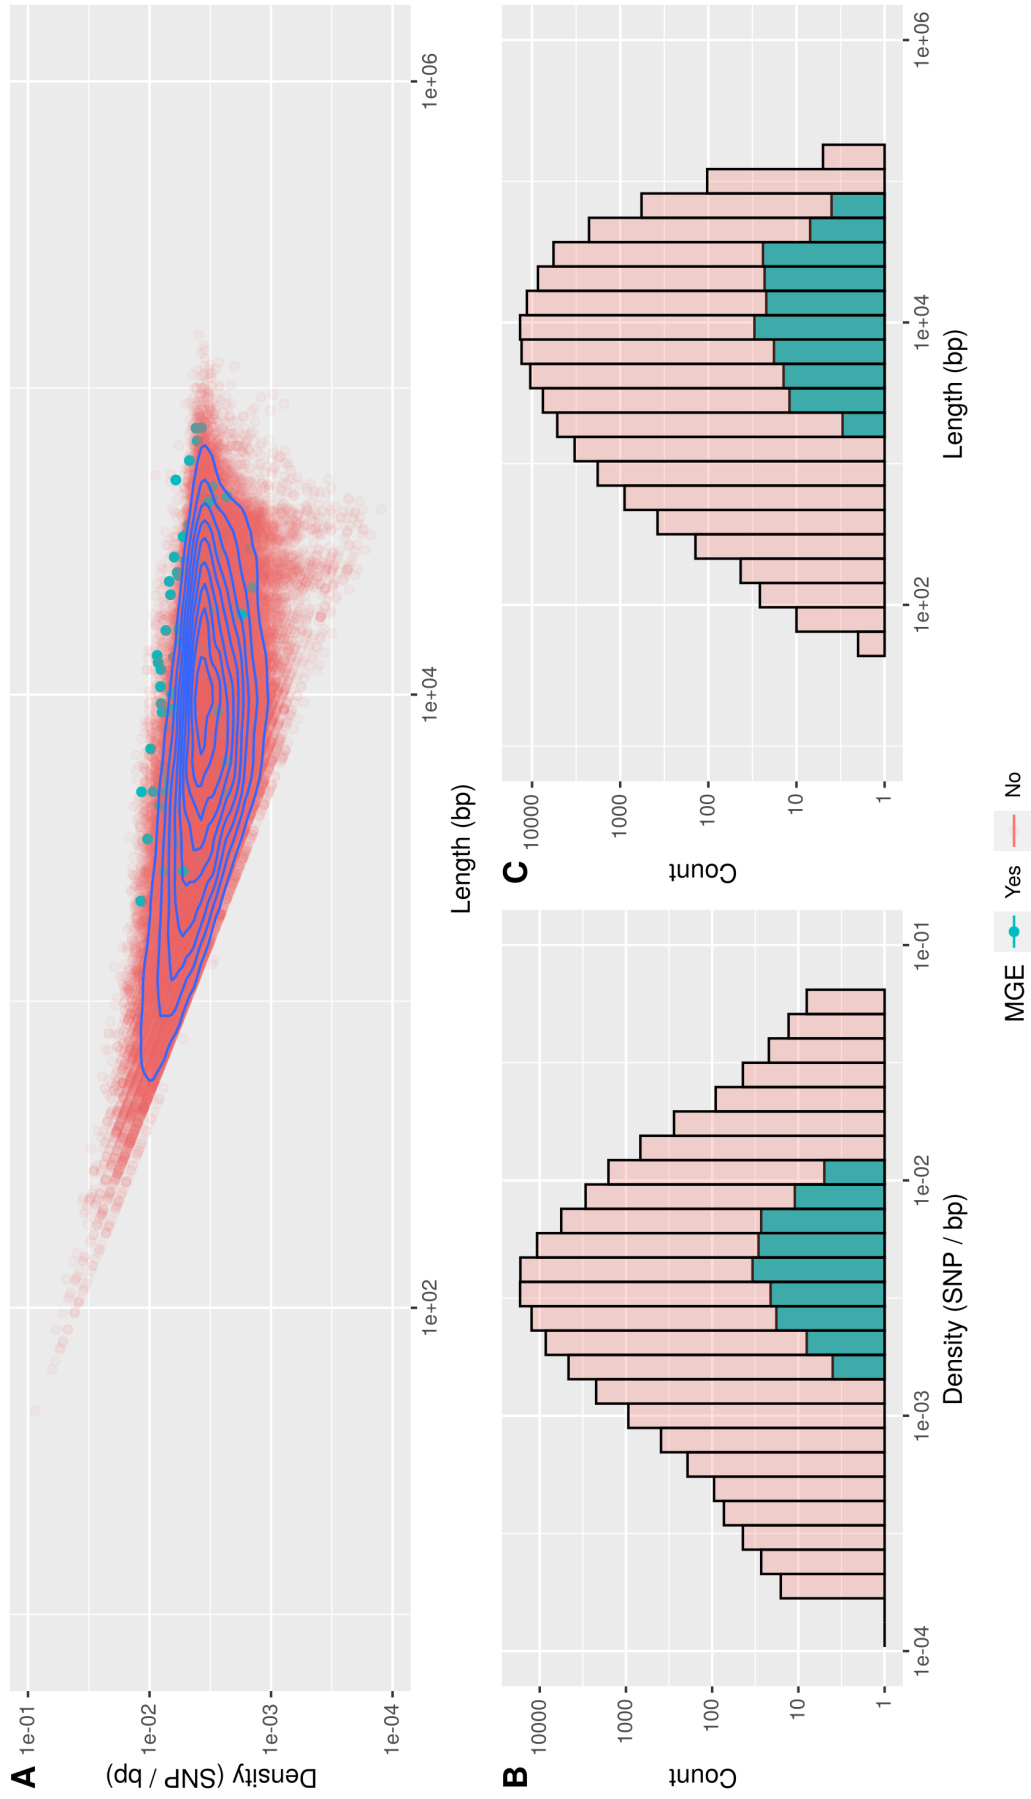

**Figure 9: Comparison of length and SNP density of recombination events.** **A** Joint plot of the SNP density and number of bases within recombination events for non-MGE importation and MGE importation. Blue contour lines represent the density of points present. **B** Overlaid histogram of SNP density within recombination events comparison. **C** Overlaid histogram of the length of recombination events in bases.

595 the integrated resistance gene decreases, the sequence more frequently matched pneumococcal DNA.

596 For Tn1207.1, it appeared *S. mitis* is the most likely donor, based on the results at the shortest flanking  
597 lengths (Figure 10). In the regions upstream of the Tn1207.1 insertion *S. mitis* was the top match for  
598 92% of 500 bp long flanks. Even at longer flank lengths *S. mitis* was still the leading match for upstream  
599 regions, although for downstream region the pneumococcus tended to become the predominant match  
to flanks by 4000 bp outside of the insertion.

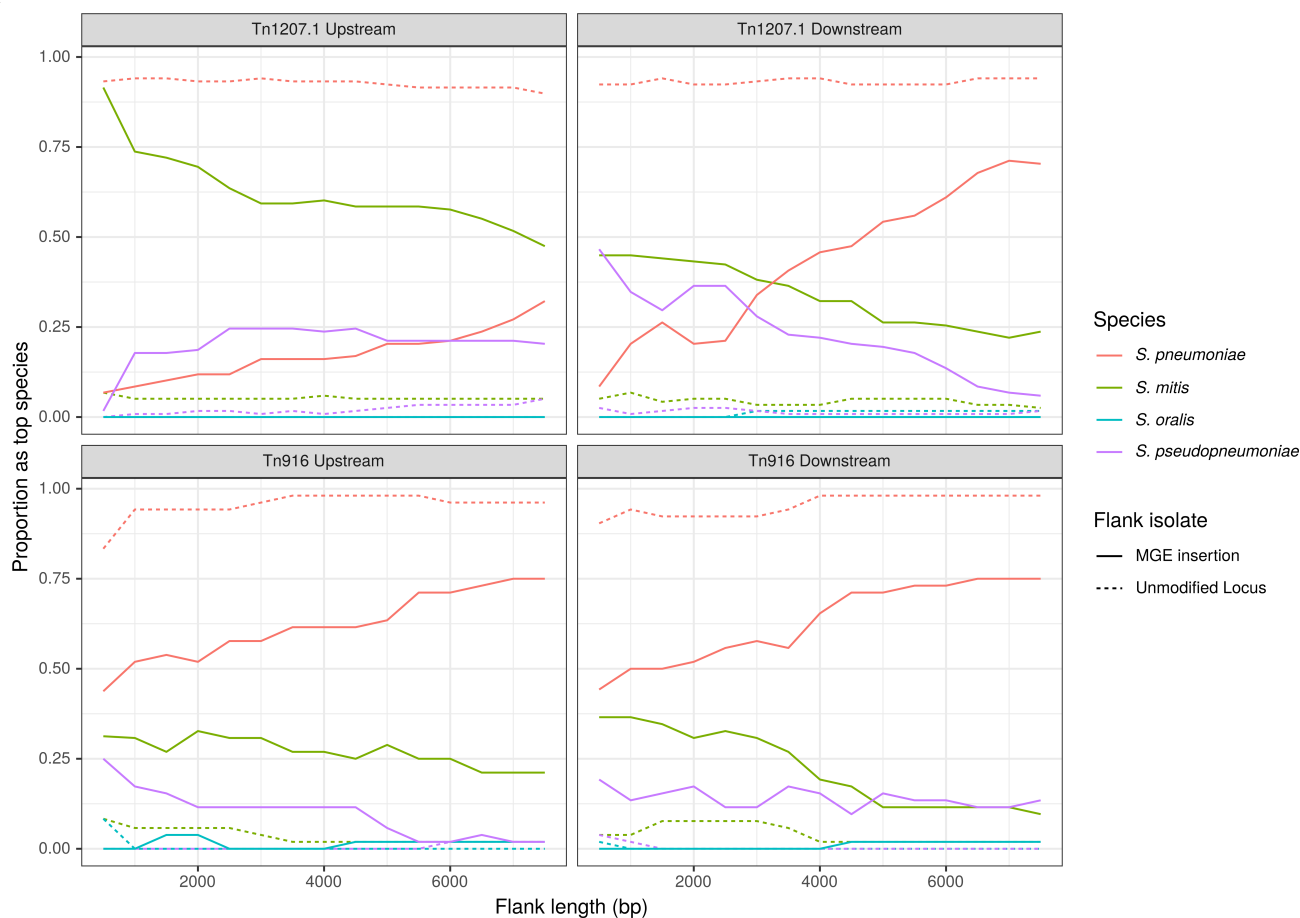

**Figure 10: The top matching species to flanks extracted around an MGE insertion.** Flanking regions upstream and downstream from MGE insertions sites were compared to a reference streptococcal database. Lines represent the proportion of matches, across all inserts reconstructed to have occurred in recombinations, that correspond to the four species present in the reference streptococcal database. The homologous regions in isolates without the MGE insertion have been extracted for comparison to these MGE hits, these are represented by the dashed unmodified locus lines. These proportions are calculated over increasing flank length away from the insertion site.

600

601 The most common Tn1207.1 insertion, that splitting the *tag* gene, can be used to illustrate the local  
602 import of sequence from another species (Figure 10-figure supplement 1). For the downstream flanks  
603 (Figure 10-figure supplement 1B) this trend appeared roughly linear with increasing flank length, the  
604 evidence for imported *S. mitis* sequence lost after 4000 bp. However, for the upstream flanking regions

605 (Figure 10-figure supplement 1A), the median  $\gamma$  score remained low with increasing flank length, with a  
606 median of 0.84 at 7500 bp upstream of the insertion. This upstream region, replaced by *S. mitis* sequence  
607 in many isolates, leads into the *uvrA* gene, another component of the nucleotide excision repair machinery  
608 within the pneumococcus. The consistency of top matches for this *tag* Tn1207.1 insertion type was high.  
609 For the upstream flank region at 500 bp long, 86% of the insertions (57 of the 66 within recombination  
610 blocks) had the *S. mitis* 21/39 (accession code AYRR00000000) reference as their top hit. In total 97%  
611 of these insertions (64 of 66) had their top hit as an *S. mitis* sequence. This lack of diversity suggests  
612 these imports originated from a single insertion in the *S. mitis* population. These imports are then likely  
613 to have moved between pneumococci multiple times.

614 The signal for the interspecies origins of Tn916 insertions was less pronounced (Figure 10). While  
615 the pneumococcus tends to be the most frequent match for the regions flanking Tn916 insertions, the  
616 proportion of matches is still far lower than seen in the control isolates, suggesting a detectable contribu-  
617 tion of interspecies import. The difficulty of identifying insertion sites for this larger MGE suggested some  
618 interspecies transfers may have been missed. Therefore a number of Tn916 acquisitions by the PMEN3  
619 lineage were analysed manually. This found evidence for homologous recombination importing the el-  
620 ements at multiple sites, with highly divergent flanking regions at each position suggesting import from  
621 another species. This applied to independent insertions near *recJ* (Figure 8-figure supplement 1), *gmuF*,  
622 which encodes mannose-6-phosphate isomerase (also known as *manA*; Figure 8-figure supplement 2),  
623 and *gidB* (Figure 8-figure supplement 3). Additionally, Tn916 was acquired through homologous recom-  
624 bination near *rplL*, with flanking remnants of Tn5252, on three independent occasions within PMEN3  
625 (Figures 8-figure supplement 4 - 8-figure supplement 6). This suggest that acquisition of Tn916 through  
626 interspecies transformation is sufficiently important as to detectably occur on multiple occasions within a  
627 single strain.



## 628 Discussion

629 These analyses describe the evolutionary histories of the *S. pneumoniae* PMEN3 and PMEN9 lineages.  
630 Comparisons between the pair illustrate the variable epidemiology of common antibiotic resistant pneu-  
631 mococci. In PMEN3, the penicillin resistant ST156 clade emerged in the early 1980s, and rapidly spread  
632 worldwide. This resembles the rapid spread of PMEN1 and PMEN14 [24, 40]. In PMEN9, resistance  
633 emerged multiple times, but in clades that remained geographically confined to Germany, South Africa  
634 and the USA. This is despite the GPSC18 strain, from which PMEN9 emerged, originating earlier than  
635 PMEN3. While both lineages contain examples of acquisitions of resistance leading to successful clade  
636 expansions, there are many unsuccessful acquisitions too. The sporadic distribution of Tn1207.1 and  
637 Tn916 across both lineages suggests any barrier to their acquisition is not the rate-limiting factor in their  
638 spread, but rather their prevalence is limited by them being insufficiently beneficial to outcompete isolates  
639 lacking these resistances [100, 101]. This is also consistent with the intermittent deletion of the Tn916 el-  
640 ement across both lineages, and the reversion to penicillin susceptibility within PMEN3, suggesting there  
641 can be selection for loss of resistance. The results from these lineages are consistent with the observa-  
642 tions from the GPS collection: hundreds of independent resistance acquisitions were observed across  
643 the species, but the majority of isolates remained macrolide and tetracycline sensitive. Taken together,  
644 this points to the ecology and context within which an isolate gains resistance being key determinants of  
645 successful spread.

646 The limited geographic range of clades within PMEN9 indicates the importance of local differences in  
647 selection pressure in determining the spread of antibiotic resistant variants. The South African and USA  
648 clades are both penicillin and co-trimoxazole resistant, whereas the German clade is sensitive to both, but  
649 resistant to macrolides. During the period of this clade's expansion, Germany was amongst the lowest  
650 consumers of antibiotics in Europe [102]. It did however have a relatively high consumption of macrolides,  
651 especially relative to penicillin consumption (Figure 6-figure supplement 1). These seem to have been  
652 ideal conditions for a macrolide resistant, but penicillin sensitive, lineage to expand. Indeed, the results  
653 from our analysis imply a significant effect of the ratio of macrolide to penicillin usage on the increase in  
654 the growth rate of  $N_e$  for this clade, with the greatest growth correlating with the steep increase in this ratio  
655 during the late 1990s. The highly invasive nature of this strain, at least when associated with serotype  
656 14, means the rates of macrolide-resistant invasive pneumococcal disease were likely disproportionately  
657 high compared to the prevalence of the resistance phenotype in carriage [41, 103]. Such locally-confined

658 transmission was also observed for the PMEN2 pneumococcal lineage [10], which also lacked the ability  
659 to undergo transformation, due to a gene needed for the competence system being disrupted by the  
660 insertion of an MGE.

661 In both cases, this condemned the clades to elimination by vaccine induced immunity, as the loss  
662 of transformability prevented vaccine evasion through serotype switching. Yet even in transformable  
663 PMEN9 clades, we observe far fewer serotype switching events than in the PMEN3 lineage. Hence the  
664 PCV7 vaccine has eliminated the PMEN9 lineage in the USA, where it was previously the most common  
665 antibiotic resistant lineage causing invasive disease [49]. By contrast, PMEN3 evaded the PCV7 vaccine  
666 through its acquisition of a serotype 19A capsule via a recombination that also elevated its penicillin  
667 MIC [104]. Following the introduction of PCV13 in the USA, the PMEN3 lineage is now mainly observed  
668 expressing serotype 35B [105].

669 In the German clade, the *Tn1207.1* that disrupted *comEC* was itself inserted through homologous  
670 recombination. Such an integration location is advantageous for a selfish element, as it prevents the  
671 *Tn1207.1* being removed or replaced in the German clade, while still permitting it to be acquired from  
672 these isolates by competent recipients in which it is currently absent [106]. This effectively reverses the  
673 normal bias towards deletion [29, 37], rather than insertion, of loci by transformation through a process  
674 akin to meiotic drive in eukaryotes [107].

675 Analysis of the regions flanking the *Tn1207.1* insertion into *comEC* indicate the element was acquired  
676 from a non-pneumococcal donor species, likely *S. mitis*. This highlights one of the key commonalities  
677 between both the antibiotic resistant clades of PMEN3 and PMEN9, in that they emerged following acqui-  
678 sition of resistant loci from related species through transformation. Interspecies transformation between  
679 viridans group streptococci species is known to be crucial where resistance emerges through modification  
680 of a core housekeeping gene via homologous recombination. The first detected penicillin resistant pneu-  
681 mococcus had mosaic *pbp* genes that originated from commensal viridians species, such as *S. mitis* and  
682 *S. oralis* [19, 34, 35, 89]. Analyses of penicillin resistant isolates from PMEN3, PMEN9 and the broader  
683 GPS collection, identified many gains of penicillin resistance associated with *pbp* genes that originated  
684 from non-pneumococcal species. This was particularly the case for *pbp2b* and *pbp2x*, which are usually  
685 the first alterations required for penicillin resistance to emerge [7]. However, substantial alterations in  
686 *pbp1a* are associated with higher levels of resistance, greater than the 0.12  $\mu\text{g/ml}$  used as the upper limit  
687 for the RF model [108]. Hence the lack of strong evidence for *pbp1a* being modified by sequence from  
688 other species may be an artefact of how transitions between discrete resistance levels were identified

689 in this study. This may also apply to the alterations to *murM*. Particular imports from other streptococci  
690 were found in PMEN3 and PMEN9 clades with high-level penicillin resistance, which also had modified  
691 *pbp* genes, suggesting epistatic interactions are likely to be important in fully understanding the role of  
692 these imported segments [109].

693 These mosaic *pbp* and *murM* gene structures likely arose from short imports favoured by transfor-  
694 mation, then integrated via homologous recombination [110]. Outside of the *pbp* loci, exchange of short  
695 DNA fragments between streptococci have been seen across the genome, especially at the competence  
696 loci [111]. Longer sequences imported by interspecies transformation events tend to be much rarer,  
697 given homologous recombination's reduced efficiency as recombinations increase in length and SNP  
698 density [32, 37]. Nevertheless, both Tn916 and Tn1207.1 were imported by large homologous recom-  
699 binations, spanning divergent loci from other species, on multiple occasions across the species. This  
700 resolves previous genomic and experimental analyses of how these loci were acquired by pneumococci.  
701 Our results show much larger elements can be acquired by the pneumococcus via transformation from  
702 other species. Such events are clearly atypical in their properties among all detected homologous re-  
703 combinations (Figure 9). Similarly the recombinations importing the *cps* loci required to escape vaccine-  
704 induced immunity are much larger than most observed around the genome (Figures 2-figure supplement  
705 2, 3-figure supplement 2). These clinically important, but unrepresentative, recombinations do not pro-  
706 vide evidence for the primary evolutionary benefit of transformation [112]. Rather, they likely reflect the  
707 concept underlying Milkman's hypothesis that exchanges between divergent genotypes will only become  
708 common in the recipient where there exists an atypically strong selection pressure [113, 114]. Were they  
709 more common, genotypes would routinely converge through recombination. In these cases, the selection  
710 pressure of antibiotic consumption is sufficient to overcome the normal barriers to exchange that maintain  
711 separate streptococcal species in the human oronasopharynx [115].

712 The interspecies flow of sequence driven by importation of Tn916 and Tn1207.1 is qualitatively dif-  
713 ferent to that resulting from modification of *pbp* genes. While recombination around the *pbp* genes can  
714 involve large non-pneumococcal sequence imports [58], typically the development of beta lactam resis-  
715 tance involved only tens or hundreds of base pair sequences exchanged within the *pbp* genes [116].  
716 These exchanges are limited to the regions surrounding the few core genome loci directly involved in  
717 determining the resistance phenotype. However, each MGE import brings in multiple kilobases of se-  
718 quence on each flank (Figure 10), and the species-wide analysis identified many different insertion sites  
719 distributed throughout the chromosome. Sequence alignments of the imported regions identify substan-

720 tial structural variation in the regions surrounding the insertion site (Figures 6-figure supplement 3 - 7-  
721 figure supplement 1, 8-figure supplement 1 - 8-figure supplement 6). In this study we make no attempt  
722 to precisely determine the strain of origin for these recombination events. While our reference database  
723 is sufficient to split likely non-pneumococcal from pneumococcal DNA, it is not detailed enough to fully  
724 delineate the networks through which AMR genes spread. It is clear that *S. mitis* is a crucial source  
725 of antibiotic resistance genes for *S. pneumoniae*, the much greater diversity of *S. mitis* means the few  
726 available samples are spread thinly across the population structure [117]. Hence much greater sam-  
727 pling of commensal streptococcal species is needed in order to assess the most likely donor species  
728 for these interspecies transformations. This demonstrates the local sequence convergence, resulting in  
729 “fuzzy species” or “despeciation” [118, 119], driven by antibiotic selection is not limited to the mosaicism of  
730 housekeeping genes associated with antibiotic resistance, but can extend throughout the streptococcal  
731 genome.

732 The sequence imported from the donor species can continue to permeate the recipient species in  
733 subsequent intraspecific recombinations, assuming that the resistance locus remains linked to the ho-  
734 mologous arms on either flank. Unless preserved by selection, these flanking sequences should erode,  
735 shortening each time a recombination’s breakpoints are closer to the resistance locus than any of the  
736 previous exchanges. Hence sensitivity to detect sequence imported from the donor species will be max-  
737 imal when the insertion is recent, and decline over time. Our ability to associate elements imported by  
738 transformation with their accompanying flanking sequences is further reduced by the intragenomic mo-  
739 bility of transposons, which may excise from their original integration site, and reinsert elsewhere in the  
740 chromosome. These are biological complications that are independent of the technical challenges of  
741 correctly inferring the co-incidence of an homologous recombination on the same phylogenetic branch,  
742 and at the same chromosomal location, as an MGE acquisition.

743 Some of these factors contribute to the much stronger association of Tn1207.1 with homologous re-  
744 combination events than Tn916. Firstly, Tn1207.1 elements are much shorter than Tn916. This both  
745 makes it easier to identify the insertion site of Tn1207.1 in contigs from draft assemblies (1,239 Tn916 in-  
746 sertions are present in contigs lacking sufficient matches to a reference, as opposed to 101 for Tn1207.1),  
747 and makes it more likely that it can be moved by transformation, which gets exponentially less efficient  
748 at inserting elements as their length increases [37]. Secondly, Tn916 elements were more commonly  
749 fixed in all isolates of a strain (1,072 Tn916 insertions, compared to 41 Tn1207.1 insertions), prevent-  
750 ing identification of the mechanism by which the MGE integrated into the chromosome. Despite these

751 technical challenges, Tn916 still remained less likely to be acquired by transformation. Hence a third con-  
752 tributor is likely Tn916 elements encoding machinery for transposition, including an integrase from the  
753 transposase subfamily of tyrosine recombinases. This integrase is broad in its insertion site preference,  
754 favouring sites that are AT rich or bent [20, 22]. Hence the Tn916 element inserts at over 70 locations  
755 in the pneumococcal genome, enabling it to disassociate from any imported flanks more efficiently than  
756 Tn1207.1, which lacks such machinery.

757 Additionally, both elements can be imported by conjugation. Tn916 encodes its own conjugative  
758 machinery, and is often found inserted into the larger Tn5252 elements, as Tn5253 composite elements  
759 [14, 120, 121]. Unlike Tn916, Tn5252 and Tn5253 type ICE can routinely be transferred between *S.*  
760 *pneumoniae* cells in vitro [37, 121]. Analogously, the most commonly identified insertion site for Tn1207.1-  
761 type elements was within Tn916-type elements, sometimes themselves within a Tn5253-type ICE [24].  
762 This reflects the modularity common in ICE evolution, which allows many different cargo genes to benefit  
763 from a single conjugative machinery [15, 16].

764 Both conjugation and transformation can allow the acquisition of resistance from other species, al-  
765 though the donor can be much less closely related in conjugation. Their relative long term contribution  
766 to resistance elements in the recipient is likely to reflect which mechanism minimises the cost of the re-  
767 combinant resistant genotype. Conjugation requires the recipient host an autonomously mobile element,  
768 whereas transformation can import a resistance locus without the burden of associated MGE sequence.  
769 However, while many mobile elements have evolved to minimise the cost of their insertion site to the  
770 host cell [122], the extensive import of sequence from another species flanking the insertion is likely to  
771 be disruptive to the recipient. This is especially likely when a host gene is disrupted, as in the example  
772 of *comEC* in the German clade. Additionally, the most frequent insertion of a Tn1207.1-type element in  
773 the core genome was the Mega element splitting the *tag* gene, a methyladenine glycosylase involved in  
774 DNA base repair. Outside of the pneumococcus there are examples of other mobile elements inserting  
775 into mutation repair machinery, which were found to cause mutator phenotypes. For instance, in *Strep-*  
776 *tococcus agalactiae* and *Vibrio splendidus*, MGEs insert between the *mutS* and *mutL* genes involved in  
777 mismatch base repair [123–125]. These MGEs however, appear to excise during different stages of cell  
778 growth, only to reenter and disrupt the genes in question, only producing mutator phenotypes during later  
779 phases of growth. In both these species, these MGEs appear functionally under the control of the host  
780 cell [124, 125]. It is unclear if the Mega element can similarly excise and reinsert under host cell control.

781 In conclusion, this study has identified the broader importance of interspecies transformation in the

782 emergence of antibiotic resistant *S. pneumoniae*. That these atypically large and SNP-dense events,  
783 originating in other streptococcal species, can be detected underscores the strong selection pressure  
784 from antibiotic consumption. This suggests there is a continual flow of sequence between related species  
785 sharing a niche, which is normally minimised by selection, but may enable rapid adaptation following  
786 public health interventions against pathogens. Even if the selection pressures are rare, transfers are  
787 sufficiently frequent for resistant genotypes to emerge and spread locally, but particularly successful  
788 genotypes, such as PMEN3, can rapidly spread between continents. This highlights the challenges of  
789 blocking the transfer of resistance loci into pathogenic species.

## 790 Funding

791 NJC and JCD were supported by the UK Medical Research Council and Department for International  
792 Development (grant nos MR/R015600/1 and MR/T016434/1). NJC was supported by a Sir Henry Dale  
793 Fellowship, jointly funded by Wellcome and the Royal Society (grant no. 104169/Z/14/A). JCD also  
794 acknowledges PhD funding from the Wellcome Trust (grant no. 102169/Z/13/Z).

795 This GPS study was co-funded by the Bill and Melinda Gates Foundation (grant code OPP1034556),  
796 the Wellcome Sanger Institute (core Wellcome grants 098051 and 206194) and the US Centers for Dis-  
797 ease Control and Prevention.

## 798 Competing interests

799 NJC has consulted for Antigen Discovery Inc. NJC has received an investigator-initiated award from  
800 GlaxoSmithKline.

## References

- [1] Brian Wahl, Katherine L. O'Brien, Adena Greenbaum, Anwasha Majumder, Li Liu, Yue Chu, Ivana Lukšić, Harish Nair, David A. McAllister, Harry Campbell, Igor Rudan, Robert Black, and Maria Deloria Knoll. Burden of *Streptococcus pneumoniae* and *Haemophilus influenzae* type b disease in children in the era of conjugate vaccines: global, regional, and national estimates for 2000–15. *The Lancet Global Health*, 6(7):e744–e757, 7 2018.
- [2] Global, regional, and national life expectancy, all-cause mortality, and cause-specific mortality for 249 causes of death, 1980–2015: a systematic analysis for the Global Burden of Disease Study 2015. *The Lancet*, 388(10053):1459–1544, 10 2016.
- [3] Alessandro Cassini, Liselotte Diaz Högberg, Diamantis Plachouras, Annalisa Quattrocchi, Ana Hoxha, Gunnar Skov Simonsen, Mélanie Colomb-Cotinat, Mirjam E. Kretzschmar, Brecht De vleeschauwer, Michele Cecchini, Driss Ait Ouakrim, Tiago Cravo Oliveira, Marc J. Struelens, Carl Suetens, Dominique L. Monnet, Reinhild Strauss, Karl Mertens, Thomas Struyf, Boudewijn Catry, Katrien Latour, Ivan N. Ivanov, Elina G. Dobрева, Arjana Tambic Andrašević, Silvija Soprek, Ana Budimir, Niki Paphitou, Helena Žemlicková, Stefan Schytte Olsen, Ute Wolff Sönksen, Pille Märtin, Marina Ivanova, Outi Lyytikäinen, Jari Jalava, Bruno Coignard, Tim Eckmanns, Muna Abu Sin, Sebastian Haller, George L. Daikos, Achilleas Gikas, Sotirios Tsiodras, Flora Kontopidou, Ákos Tóth, Ágnes Hajdu, Ólafur Guólaugsson, Karl G. Kristinsson, Stephen Murchan, Karen Burns, Patrizio Pezzotti, Carlo Gagliotti, Uga Dumpis, Agne Liuimiene, Monique Perrin, Michael A. Borg, Sabine C. de Greeff, Jos CM Monen, Mayke BG Koek, Petter Elstrøm, Dorota Zabicka, Aleksander Deptula, Waleria Hryniewicz, Manuela Caniça, Paulo Jorge Nogueira, Paulo André Fernandes, Vera Manageiro, Gabriel A. Popescu, Roxana I. Serban, Eva Schréterová, Slavka Litvová, Mária Štefkovicová, Jana Kolman, Irena Klavs, Aleš Korošec, Belén Aracil, Angel Asensio, María Pérez-Vázquez, Hanna Billström, Sofie Larsson, Jacqui S. Reilly, Alan Johnson, and Susan Hopkins. Attributable

- deaths and disability-adjusted life-years caused by infections with antibiotic-resistant bacteria in the EU and the European Economic Area in 2015: a population-level modelling analysis. *The Lancet Infectious Diseases*, 19(1):56–66, 1 2019.
- [4] Daniel R. Feikin, Anne Schuchat, Margarette Kolczak, Nancy L. Barrett, Lee H. Harrison, Lewis Lefkowitz, Allison McGeer, Monica M. Farley, Duc J. Vugia, Catherine Lexau, Karen R. Stefonek, Jan E. Patterson, and James H. Jorgensen. Mortality from invasive pneumococcal pneumonia in the era of antibiotic resistance, 1995-1997. *American Journal of Public Health*, 90(2):223–229, 2000.
- [5] I. Roca, M. Akova, F. Baquero, J. Carlet, M. Cavaleri, S. Coenen, J. Cohen, D. Findlay, I. Gyssens, O.E. Heur, G. Kahlmeter, H. Kruse, R. Laxminarayan, E. Liébana, L. López-Cerero, A. MacGowan, M. Martins, J. Rodríguez-Baño, J.-M. Rolain, C. Segovia, B. Sigauque, E. Tacconelli, E. Wellington, and J. Vila. The global threat of antimicrobial resistance: science for intervention. *New Microbes and New Infections*, 6:22–29, 7 2015.
- [6] P. C. Appelbaum. World-wide development of antibiotic resistance in pneumococci, 8 1987.
- [7] Tamsin C M Dewé, Joshua C D'Aeth, and Nicholas J Croucher. Genomic epidemiology of penicillin-non-susceptible *Streptococcus pneumoniae*. *Microbial genomics*, 10 2019.
- [8] Anne Vergison, Ron Dagan, Adriano Arguedas, Jan Bonhoeffer, Robert Cohen, Ingeborg Dhooge, Alejandro Hoberman, Johannes Liese, Paola Marchisio, Arto A Palmu, G Thomas Ray, Elisabeth A M Sanders, Eric A F Simões, Matti Uhari, Johan van Eldere, and Stephen I Pelton. Otitis media and its consequences: beyond the earache. *The Lancet. Infectious diseases*, 10(3):195–203, 3 2010.
- [9] Chrispin Chaguza, Jennifer E. Cornick, Cheryl P. Andam, Rebecca A. Gladstone, Maaïke Alaerts, Patrick Musicha, Chikondi Peno, Naor Bar-Zeev, Arox W. Kamng'ona, Anmol M. Kiran, Chisomo L. Msefula, Lesley McGee, Robert F. Breiman, Aras Kadioglu, Neil French, Robert S. Heyderman, William P. Hanage, Stephen D. Bentley, and Dean B. Everett. Population genetic structure, antibiotic resistance, capsule switching and evolution of invasive pneumococci before conjugate vaccination in Malawi. *Vaccine*, 35(35):4594–4602, 8 2017.
- [10] Nicholas J Croucher, William P Hanage, Simon R Harris, Lesley McGee, der Linden van, Herminia de Lencastre, Raquel Sá-Leão, Jae-Hoon Song, Kwan Soo Ko, Bernard Beall, Keith P Klugman, Julian Parkhill, Alexander Tomasz, Karl G Kristinsson, and Stephen D Bentley. Variable recombination dynamics during the emergence, transmission and 'disarming' of a multidrug-resistant pneumococcal clone. *BMC Biology*, 12(1):49, 2014.
- [11] M. D. Smith and W. R. Guild. A plasmid in *Streptococcus pneumoniae*. *Journal of Bacteriology*, 137(2):735–739, 1979.
- [12] Patricia Romero, Daniel Lull, Ernesto García, Tim J. Mitchell, Rubens López, and Miriam Moscoso. Isolation and characterization of a new plasmid pSpnP1 from a multidrug-resistant clone of *Streptococcus pneumoniae*. *Plasmid*, 58(1):51–60, 7 2007.
- [13] C Schuster, M van der Linden, and R Hakenbeck. Small cryptic plasmids of *Streptococcus pneumoniae* belong to the pC194/pUB110 family of rolling circle plasmids. *FEMS microbiology letters*, 164(2):427–431, 7 1998.
- [14] Nicholas J Croucher, Danielle Walker, Patricia Romero, Nicola Lennard, Gavin K Paterson, Nathalie C Bason, Andrea M Mitchell, Michael A Quail, Peter W Andrew, Julian Parkhill, Stephen D



- Bentley, and Tim J Mitchell. Role of Conjugative Elements in the Evolution of the Multidrug-Resistant Pandemic Clone *Streptococcus pneumoniae* Spain23F ST81. *Journal of Bacteriology*, 191(5):1480–1489, 3 2009.
- [15] N J Croucher, P G Coupland, A E Stevenson, A Callendrello, S D Bentley, and W P Hanage. Diversification of bacterial genome content through distinct mechanisms over different timescales. 5, 2014.
- [16] Christopher M Johnson and Alan D Grossman. Integrative and Conjugative Elements (ICEs): What They Do and How They Work. *Annual Review of Genetics*, 49(1):577–601, 1 2015.
- [17] Kate S. Baker, Timothy J. Dallman, Nigel Field, Tristan Childs, Holly Mitchell, Martin Day, François-Xavier Weill, Sophie Lefèvre, Mathieu Tourdjman, Gwenda Hughes, Claire Jenkins, and Nicholas Thomson. Horizontal antimicrobial resistance transfer drives epidemics of multiple *Shigella* species. *Nature Communications*, 9(1):1462, 12 2018.
- [18] Elena Cabezón, Jorge Ripoll-Rozada, Alejandro Peña, Fernando de la Cruz, and Ignacio Arechaga. Towards an integrated model of bacterial conjugation. *FEMS Microbiology Reviews*, 39(1):n/a–n/a, 9 2014.
- [19] Christian J.H. Von Wintersdorff, John Penders, Julius M. Van Niekerk, Nathan D. Mills, Snehal Majumder, Lieke B. Van Alphen, Paul H.M. Savelkoul, and Petra F.G. Wolfs. Dissemination of antimicrobial resistance in microbial ecosystems through horizontal gene transfer, 2 2016.
- [20] Adam P Roberts and Peter Mullany. A modular master on the move: the Tn916 family of mobile genetic elements. *Trends in Microbiology*, 17(6):251–258, 11 2009.
- [21] Sanin Musovic, Gunnar Oregaard, Niels Kroer, and Søren J. Sørensen. Cultivation-independent examination of horizontal transfer and host range of an IncP-1 plasmid among gram-positive and gram-negative bacteria indigenous to the barley rhizosphere. *Applied and Environmental Microbiology*, 72(10):6687–6692, 10 2006.
- [22] Rachel A. F. Wozniak and Matthew K. Waldor. Integrative and conjugative elements: mosaic mobile genetic elements enabling dynamic lateral gene flow. *Nature Reviews Microbiology*, 8(8):552–563, 8 2010.
- [23] Adam P Roberts and Peter Mullany. Tn916-like genetic elements: a diverse group of modular mobile elements conferring antibiotic resistance. *FEMS microbiology reviews*, 35(5):856–871, 9 2011.
- [24] N J Croucher, S R Harris, C Fraser, M A Quail, J Burton, M van der Linden, L Mcgee, A von Gottberg, J H Song, K S Ko, B Pichon, S Baker, C M Parry, L M Lambertsen, D Shahinas, D R Pillai, T J Mitchell, G Dougan, A Tomasz, K P Klugman, J Parkhill, W P Hanage, and S D Bentley. Rapid Pneumococcal Evolution in Response to Clinical Interventions. 331(6016):430–434, 2011.
- [25] WHO publishes list of bacteria for which new antibiotics are urgently needed.
- [26] Marina Mingoia, Emily Tili, Esther Manso, Pietro E Varaldo, and Maria Pia Montanari. Heterogeneity of Tn5253-like composite elements in clinical *Streptococcus pneumoniae* isolates. *Antimicrobial Agents & Chemotherapy*, 55(4):1453–1459, 4 2011.
- [27] Ileana Cochetti, Emily Tili, Manuela Vecchi, Aldo Manzin, Marina Mingoia, Pietro E Varaldo, and Maria Pia Montanari. New Tn916-related elements causing erm(B)-mediated erythromycin resistance in tetracycline-susceptible pneumococci. *Journal of Antimicrobial Chemotherapy*, 60(1):127–131, 7 2007.

- [28] Calum Johnston, Bernard Martin, Gwennaele Fichant, Patrice Polard, and Jean-Pierre Claverys. Bacterial transformation: distribution, shared mechanisms and divergent control. *Nature Reviews Microbiology*, 12(3):181–196, 3 2014.
- [29] Nicholas J Croucher, Rafal Mostowy, Christopher Wymant, Paul Turner, Stephen D Bentley, and Christophe Fraser. Horizontal DNA Transfer Mechanisms of Bacteria as Weapons of Intragenomic Conflict. *PLoS Biology*, 14(3):e1002394, 3 2016.
- [30] Stephanie H. Kung, Adam C. Retchless, Jessica Y. Kwan, and Rodrigo P.P. Almeida. Effects of DNA size on transformation and recombination efficiencies in *xylella fastidiosa*. *Applied and Environmental Microbiology*, 79(5):1712–1717, 3 2013.
- [31] Rafal J Mostowy, Nicholas J Croucher, Nicola De Maio, Claire Chewapreecha, Susannah J Salter, Paul Turner, David M Aanensen, Stephen D Bentley, Xavier Didelot, and Christophe Fraser. Pneumococcal Capsule Synthesis Locus *cps* as Evolutionary Hotspot with Potential to Generate Novel Serotypes by Recombination. *Molecular biology and evolution*, 34(10):2537–2554, 2017.
- [32] Nicholas J Croucher, Simon R Harris, Lars Barquist, Julian Parkhill, and Stephen D Bentley. A High-Resolution View of Genome-Wide Pneumococcal Transformation. *PLoS Pathogens*, 8(6):e1002745, 6 2012.
- [33] Jacek Majewski, Piotr Zawadzki, Paul Pickerill, Frederick M Cohan, and Christopher G Dowson. Barriers to Genetic Exchange between Bacterial Species: *Streptococcus pneumoniae* Transformation. *Journal of Bacteriology*, 182(4):1016–1023, 2 2000.
- [34] C G Dowson, T J Coffey, C Kell, and R A Whiley. Evolution of penicillin resistance in *Streptococcus pneumoniae*; the role of *Streptococcus mitis* in the formation of a low affinity PBP2B in *S. pneumoniae*. *Molecular Microbiology*, 9(3):635–643, 8 1993.
- [35] C. G. Dowson, A. Hutchison, N. Woodford, A. P. Johnson, R. C. George, and B. G. Spratt. Penicillin-resistant viridans streptococci have obtained altered penicillin-binding protein genes from penicillin-resistant strains of *Streptococcus pneumoniae*. *Proceedings of the National Academy of Sciences of the United States of America*, 87(15):5858–5862, 1990.
- [36] M C Enright and B G Spratt. Extensive variation in the *ddl* gene of penicillin-resistant *Streptococcus pneumoniae* results from a hitchhiking effect driven by the penicillin-binding protein 2b gene. *Molecular Biology and Evolution*, 16(12):1687–1695, 12 1999.
- [37] Katinka J. Apagyi, Christophe Fraser, and Nicholas J. Croucher. Transformation asymmetry and the evolution of the bacterial accessory genome. *Molecular Biology and Evolution*, 2018.
- [38] Sara Domingues, Klaus Harms, W. Florian Fricke, Pål J. Johnsen, Gabriela J. da Silva, and Kaare Magne Nielsen. Natural Transformation Facilitates Transfer of Transposons, Integrons and Gene Cassettes between Bacterial Species. *PLoS Pathogens*, 8(8):1002837, 8 2012.
- [39] Scott T Chancey, Sonia Agrawal, Max R Schroeder, Monica M Farley, Herve Tettelin, and David S Stephens. Composite mobile genetic elements disseminating macrolide resistance in *Streptococcus pneumoniae*. *Frontiers in Microbiology*, 6:26, 2015.
- [40] Nicholas J Croucher, Claire Chewapreecha, William P Hanage, Simon R Harris, Lesley McGee, Mark van der Linden, Jae-Hoon Song, Kwan Soo Ko, Herminia de Lencastre, Claudia Turner, Fan Yang, Raquel Sá-Leão, Bernard Beall, Keith P Klugman, Julian Parkhill, Paul Turner, and Stephen D Bentley. Evidence for soft selective sweeps in the evolution of pneumococcal multidrug resistance and vaccine escape. *Genome biology and evolution*, 6(7):1589–1602, 7 2014.

- [41] Rebecca A. Gladstone, Stephanie W. Lo, John A. Lees, Nicholas J. Croucher, Andries J. van Tonder, Jukka Corander, Andrew J. Page, Pekka Marttinen, Leon J. Bentley, Theresa J. Ochoa, Pak Leung Ho, Mignon du Plessis, Jennifer E. Cornick, Brenda Kwambana-Adams, Rachel Benisty, Susan A. Nzenze, Shabir A. Madhi, Paulina A. Hawkins, Dean B. Everett, Martin Antonio, Ron Dagan, Keith P. Klugman, Anne von Gottberg, Lesley McGee, Robert F. Breiman, and Stephen D. Bentley. International genomic definition of pneumococcal lineages, to contextualise disease, antibiotic resistance and vaccine impact. *EBioMedicine*, 43:338–346, 5 2019.
- [42] T J Coffey, C G Dowson, M Daniels, J Zhou, C Martin, B G Spratt, and J M Musser. Horizontal transfer of multiple penicillin-binding protein genes, and capsular biosynthetic genes, in natural populations of *Streptococcus pneumoniae*. *Molecular Microbiology*, 5(9):2255–2260, 9 1991.
- [43] J C Lefèvre, M A Bertrand, and G Faucon. Molecular analysis by pulsed-field gel electrophoresis of penicillin-resistant *Streptococcus pneumoniae* from Toulouse, France. *European Journal of Clinical Microbiology & Infectious Diseases: Official Publication of the European Society of Clinical Microbiology*, 14(6):491–497, 6 1995.
- [44] A. CORSO, E.P. SEVERINA, V.F. PETRUK, Y.R. MAURLZ, and A. TOMASZ. Molecular Characterization of Penicillin-Resistant *Streptococcus pneumoniae* Isolates Causing Respiratory Disease in the United States. *Microbial Drug Resistance*, 4(4):325–337, 1 1998.
- [45] ALEXANDER TOMASZ, ALEJANDRA CORSO, ELENA P. SEVERINA, GABRIELA ECHÁNIZ-AVILES, MARIA CRISTINA DE CUNTO BRANDILEONE, TERESA CAMOU, ELIZABETH CASTAÑEDA, OSCAR FIGUEROA, ALICIA ROSSI, and JOSÉ LUIS DI FABIO. Molecular Epidemiologic Characterization of Penicillin-Resistant *Streptococcus pneumoniae* Invasive Pediatric Isolates Recovered in Six Latin-American Countries: An Overview. *Microbial Drug Resistance*, 4(3):195–207, 1 1998.
- [46] G Gherardi, C G Whitney, R R Facklam, and B Beall. Major related sets of antibiotic-resistant Pneumococci in the United States as determined by pulsed-field gel electrophoresis and pbp1a-pbp2b-pbp2x-dhf restriction profiles. *The Journal of Infectious Diseases*, 181(1):216–229, 1 2000.
- [47] R Sá-Leão, A Tomasz, I S Sanches, A Brito-Avô, S E Vilhelmsson, K G Kristinsson, and H de Lencastre. Carriage of internationally spread clones of *Streptococcus pneumoniae* with unusual drug resistance patterns in children attending day care centers in Lisbon, Portugal. *The Journal of Infectious Diseases*, 182(4):1153–1160, 10 2000.
- [48] Maria N Tsolia, George Stamos, Sophia Ioannidou, Ronit Treffer, Maria Foustoukou, Dimitris Kafetzis, and Nurith Porat. Genetic relatedness of resistant and multiresistant *Streptococcus pneumoniae* strains, recovered in the Athens area, to international clones. *Microbial Drug Resistance (Larchmont, N.Y.)*, 8(3):219–226, 2002.
- [49] Lindsay Kim, Lesley McGee, Sara Tomczyk, and Bernard Beall. Biological and Epidemiological Features of Antibiotic-Resistant *Streptococcus pneumoniae* in Pre- and Post-Conjugate Vaccine Eras: a United States Perspective. *Clinical microbiology reviews*, 29(3):525–552, 7 2016.
- [50] Christine Bley, Mark van der Linden, and Ralf René Reinert. *mef(A)* is the predominant macrolide resistance determinant in *Streptococcus pneumoniae* and *Streptococcus pyogenes* in Germany. *International Journal of Antimicrobial Agents*, 37(5):425–431, 2011.
- [51] Matthias Imöhl, Ralf René Reinert, Christina Mutscher, and Mark van der Linden. Macrolide susceptibility and serotype specific macrolide resistance of invasive isolates of *Streptococcus pneumoniae* in Germany from 1992 to 2008. *BMC Microbiology*, 10(1):299, 2010.

- [52] H Žemličková, V Jakubů, and P Urbášková. Dissemination of a capsular and antibiotype variant of the England<sup>14</sup>-9 pneumococcal clone in the Czech Republic. *Clinical Microbiology and Infection*, 13(6):648–651, 6 2007.
- [53] Ileana Cochetti, Manuela Vecchi, Marina Mingoia, Emily Tili, Maria R Catania, Aldo Manzin, Pietro E Varaldo, and Maria Pia Montanari. Molecular characterization of pneumococci with efflux-mediated erythromycin resistance and identification of a novel *mef* gene subclass, *mef(I)*. *Antimicrobial Agents & Chemotherapy*, 49(12):4999–5006, 12 2005.
- [54] Jordi Càmara, Meritxell Cubero, Antonio J Martín-Galiano, Ernesto García, Imma Grau, Jesper B Nielsen, Peder Worning, Fe Tubau, Román Pallarés, M Ángeles Domínguez, Mogens Kilian, Josefina Liñares, Henrik Westh, and Carmen Ardanuy. Evolution of the  $\beta$ -lactam-resistant *Streptococcus pneumoniae* PMEN3 clone over a 30 year period in Barcelona, Spain. *Journal of Antimicrobial Chemotherapy*, 73(11):2941–2951, 11 2018.
- [55] A Corso, D Faccone, P Gagetti, J Pace, M Regueira, and Julio Pace. Prevalence of *mef* and *ermB* genes in invasive pediatric erythromycin-resistant *Streptococcus pneumoniae* isolates from Argentina. *Revista Argentina de microbiologia*, 41(1):29–33, 2009.
- [56] GPS :: Global Pneumococcal Sequencing Project.
- [57] Paul Turner, Claudia Turner, Auscharee Jankhot, Naw Helen, Sue J. Lee, Nicholas P. Day, Nicholas J. White, Francois Nosten, and David Goldblatt. A Longitudinal Study of *Streptococcus pneumoniae* Carriage in a Cohort of Infants and Their Mothers on the Thailand-Myanmar Border. *PLoS ONE*, 7(5):e38271, 5 2012.
- [58] Mark C. Enright and Brian G. Spratt. A multilocus sequence typing scheme for *Streptococcus pneumoniae*: Identification of clones associated with serious invasive disease. *Microbiology*, 144(11):3049–3060, 11 1998.
- [59] L McGee, L McDougal, J Zhou, B G Spratt, F C Tenover, R George, R Hakenbeck, W Hryniewicz, J C Lefèvre, A Tomasz, and K P Klugman. Nomenclature of major antimicrobial-resistant clones of *Streptococcus pneumoniae* defined by the pneumococcal molecular epidemiology network. *Journal of Clinical Microbiology*, 39(7):2565–2571, 7 2001.
- [60] Lennard Epping, Andries J. van Tonder, Rebecca A. Gladstone, Stephen D. Bentley, Andrew J. Page, and Jacqueline A. Keane. SeroBA: Rapid high-throughput serotyping of *Streptococcus pneumoniae* from whole genome sequence data. *Microbial Genomics*, 4(7), 7 2018.
- [61] John A. Lees, Simon R. Harris, Gerry Tonkin-Hill, Rebecca A. Gladstone, Stephanie W. Lo, Jeffrey N. Weiser, Jukka Corander, Stephen D. Bentley, and Nicholas J. Croucher. Fast and flexible bacterial genomic epidemiology with PopPUNK. *Genome Research*, 29(2):304–316, 2 2019.
- [62] Andrew J. Page, Nishadi De Silva, Martin Hunt, Michael A. Quail, Julian Parkhill, Simon R. Harris, Thomas D. Otto, and Jacqueline A. Keane. Robust high-throughput prokaryote de novo assembly and improvement pipeline for Illumina data. *Microbial genomics*, 2(8):e000083, 8 2016.
- [63] Daniel R. Zerbino and Ewan Birney. Velvet: Algorithms for de novo short read assembly using de Bruijn graphs. *Genome Research*, 18(5):821–829, 5 2008.
- [64] Marten Boetzer and Walter Pirovano. SSPACE-LongRead: Scaffolding bacterial draft genomes using long read sequence information. *BMC Bioinformatics*, 15(1):211, 6 2014.
- [65] Marten Boetzer and Walter Pirovano. Toward almost closed genomes with GapFiller. *Genome Biology*, 13(6):R56, 6 2012.

- [66] Torsten Seemann. Prokka: rapid prokaryotic genome annotation. *Bioinformatics (Oxford, England)*, 30(14):2068–2069, 7 2014.
- [67] Min Jung Kwun, Marco R Oggioni, Megan De Ste Croix, Stephen D Bentley, and Nicholas J Croucher. Excision-reintegration at a pneumococcal phase-variable restriction-modification locus drives within- and between-strain epigenetic differentiation and inhibits gene acquisition. *Nucleic Acids Research*, 2018.
- [68] Harris S R. SKA: Split Kmer Analysis Toolkit for Bacterial Genomic Epidemiology. *bioRxiv*, page 453142, 10 2018.
- [69] Ralf René Reinert, Adnan Al-Lahham, Maria Lemperle, Christoph Tenholte, Claudia Briefs, Stefan Haupts, Hans Hubert Gerards, and Rudolf Lütticken. Emergence of macrolide and penicillin resistance among invasive pneumococcal isolates in Germany. *Journal of Antimicrobial Chemotherapy*, 49(1):61–68, 11 2002.
- [70] P McManus, M L Hammond, S D Whicker, J G Primrose, A Mant, and S R Fairall. Antibiotic use in the Australian community, 1990-1995. *The Medical journal of Australia*, 167(3):124–127, 8 1997.
- [71] N J Croucher, A J Page, T R Connor, A J Delaney, J A Keane, S D Bentley, J Parkhill, and S R Harris. Rapid phylogenetic analysis of large samples of recombinant bacterial whole genome sequences using Gubbins. *Nucleic Acids Research*, 43(3), 2015.
- [72] Morgan N. Price, Paramvir S. Dehal, and Adam P. Arkin. FastTree 2 - Approximately maximum-likelihood trees for large alignments. *PLoS ONE*, 5(3):e9490, 3 2010.
- [73] Alexandros Stamatakis. RAxML version 8: A tool for phylogenetic analysis and post-analysis of large phylogenies. *Bioinformatics*, 30(9):1312–1313, 5 2014.
- [74] Xavier Didelot, Nicholas J Croucher, Stephen D Bentley, Simon R Harris, and Daniel J Wilson. Bayesian inference of ancestral dates on bacterial phylogenetic trees. *Nucleic Acids Research*, 2018.
- [75] Erik M Volz and Xavier Didelot. Modeling the Growth and Decline of Pathogen Effective Population Size Provides Insight into Epidemic Dynamics and Drivers of Antimicrobial Resistance. *Systematic Biology*, 2 2018.
- [76] Yuan Li, Benjamin J. Metcalf, Sopia Chochua, Zhongya Li, Robert E. Gertz, Hollis Walker, Paulina A. Hawkins, Theresa Tran, Lesley McGee, and Bernard W. Beall. Validation of  $\beta$ -lactam minimum inhibitory concentration predictions for pneumococcal isolates with newly encountered penicillin binding protein (PBP) sequences. *BMC Genomics*, 18(1):621, 12 2017.
- [77] Streptococcus Lab | StrepLab | MIC tables and sequences | CDC.
- [78] Effects of New Penicillin Susceptibility Breakpoints for *Streptococcus pneumoniae*—United States, 2006–2007.
- [79] Sean R Eddy. Accelerated Profile HMM Searches. *PLOS Computational Biology*, 7(10):e1002195, 10 2011.
- [80] B J Metcalf, S Chochua, R E Jr Gertz, Z Li, H Walker, T Tran, P A Hawkins, A Glennen, R Lynfield, Y Li, L McGee, and B Beall. Using whole genome sequencing to identify resistance determinants and predict antimicrobial resistance phenotypes for year 2015 invasive pneumococcal disease isolates recovered in the United States. *Clinical microbiology and infection : the official publication of the European Society of Clinical Microbiology and Infectious Diseases*, 22(12):1–1002, 12 2016.

- [81] Liam J. Revell. phytools: an R package for phylogenetic comparative biology (and other things). *Methods in Ecology and Evolution*, 3(2):217–223, 4 2012.
- [82] Sohta A. Ishikawa, Anna Zhukova, Wataru Iwasaki, Olivier Gascuel, and Tal Pupko. A Fast Likelihood Method to Reconstruct and Visualize Ancestral Scenarios. *Molecular Biology and Evolution*, 36(9):2069–2085, 9 2019.
- [83] Supathap Tansirichaiya, Md. Ajjur Rahman, and Adam P Roberts. The Transposon Registry. *Mobile DNA*, 10(1):40, 2019.
- [84] Rafal Mostowy, Nicholas J. Croucher, Cheryl P. Andam, Jukka Corander, William P. Hanage, and Pekka Marttinen. Efficient Inference of Recent and Ancestral Recombination within Bacterial Populations. *Molecular Biology and Evolution*, 34(5):1167–1182, 5 2017.
- [85] Robert C Edgar. MUSCLE: a multiple sequence alignment method with reduced time and space complexity. *BMC Bioinformatics*, 5(1):113, 2004.
- [86] Nicholas J. Croucher, Joseph J. Campo, Timothy Q. Le, Xiaowu Liang, Stephen D. Bentley, William P. Hanage, and March Lipsitch. Diverse evolutionary patterns of pneumococcal antigens identified by pangenome-wide immunological screening. *Proceedings of the National Academy of Sciences of the United States of America*, 114(3):E357–E366, 1 2017.
- [87] S. J. Salter, J. Hinds, K. A. Gould, L. Lambertsen, W. P. Hanage, M. Antonio, P. Turner, P. W. M. Hermans, H. J. Bootsma, K. L. O’Brien, and S. D. Bentley. Variation at the capsule locus, cps, of mistyped and non-typable *Streptococcus pneumoniae* isolates. *Microbiology*, 158(Pt 6):1560, 2012.
- [88] André Zapun, Carlos Contreras-Martel, and Thierry Vernet. Penicillin-binding proteins and  $\beta$ -lactam resistance. *FEMS Microbiology Reviews*, 32(2):361–385, 3 2008.
- [89] G Laible, B G Spratt, and R Hakenbeck. Interspecies recombinational events during the evolution of altered PBP 2x genes in penicillin-resistant clinical isolates of *Streptococcus pneumoniae*. *Molecular Microbiology*, 5(8):1993–2002, 8 1991.
- [90] S R Filipe, E Severina, and A Tomasz. Distribution of the mosaic structured murM genes among natural populations of *Streptococcus pneumoniae*. *Journal of bacteriology*, 182(23):6798–805, 12 2000.
- [91] S. R. Filipe and A. Tomasz. Inhibition of the expression of penicillin resistance in *Streptococcus pneumoniae* by inactivation of cell wall mucopeptide branching genes. *Proceedings of the National Academy of Sciences*, 97(9):4891–4896, 4 2000.
- [92] J P Maskell, A M Sefton, and L M Hall. Multiple mutations modulate the function of dihydrofolate reductase in trimethoprim-resistant *Streptococcus pneumoniae*. *Antimicrobial agents and chemotherapy*, 45(4):1104–8, 4 2001.
- [93] Brodie Daniels, Anna Coutsoydis, Eshia Moodley-Govender, Helen Mulol, Elizabeth Spooner, Photini Kiepiela, Shabashini Reddy, Linda Zako, Nhan T. Ho, Louise Kuhn, and Gita Ramjee. Effect of co-trimoxazole prophylaxis on morbidity and mortality of HIV-exposed, HIV-uninfected infants in South Africa: a randomised controlled, non-inferiority trial. *The Lancet Global Health*, 7(12):e1717–e1727, 12 2019.
- [94] M Del Grosso, F Iannelli, C Messina, M Santagati, N Petrosillo, S Stefani, G Pozzi, and A Pantosti. Macrolide efflux genes *mef(A)* and *mef(E)* are carried by different genetic elements in *Streptococcus pneumoniae*. *Journal of clinical microbiology*, 40(3):774–778, 3 2002.

- [95] Mark van der Linden, Gerhard Falkenhorst, Stephanie Perniciaro, Christina Fitzner, and Matthias Imöhl. Effectiveness of Pneumococcal Conjugate Vaccines (PCV7 and PCV13) against Invasive Pneumococcal Disease among Children under Two Years of Age in Germany. *PLoS One*, 11(8):e0161257, 8 2016.
- [96] Nicholas J. Croucher, Lisa Kagedan, Claudette M. Thompson, Julian Parkhill, Stephen D. Bentley, Jonathan A. Finkelstein, Marc Lipsitch, and William P. Hanage. Selective and Genetic Constraints on Pneumococcal Serotype Switching. *PLOS Genetics*, 11(3):e1005095, 3 2015.
- [97] Mathieu Bergé, Miriam Moscoso, Marc Prudhomme, Bernard Martin, and Jean Pierre Claverys. Uptake of transforming DNA in Gram-positive bacteria: A view from *Streptococcus pneumoniae*. *Molecular Microbiology*, 45(2):411–421, 2002.
- [98] Maria Del Grosso, Romina Camilli, Francesco Iannelli, Gianni Pozzi, and Annalisa Pantosti. The *mef(E)*-carrying genetic element (mega) of *Streptococcus pneumoniae*: insertion sites and association with other genetic elements. *Antimicrobial Agents & Chemotherapy*, 50(10):3361–3366, 10 2006.
- [99] K Poulsen, J Reinholdt, and M Kilian. Characterization of the *Streptococcus pneumoniae* immunoglobulin A1 protease gene (*iga*) and its translation product. *Infection and immunity*, 64(10):3957–3966, 10 1996.
- [100] Nicholas G. Davies, Stefan Flasche, Mark Jit, and Katherine E. Atkins. Within-host dynamics shape antibiotic resistance in commensal bacteria. *Nature Ecology & Evolution*, 2 2019.
- [101] Sonja Lehtinen, Claire Chewapreecha, John Lees, William P Hanage, Marc Lipsitch, Nicholas J Croucher, Stephen D Bentley, Paul Turner, Christophe Fraser, and Rafał J Mostowy. Horizontal gene transfer rate is not the primary determinant of observed antibiotic resistance frequencies in *Streptococcus pneumoniae*. *Science Advances*, 6(21):eaaz6137, 5 2020.
- [102] Otto Cars, Sigvard Mölstad, and Arne Melander. Variation in antibiotic use in the European Union. *Lancet*, 357(9271):1851–1853, 6 2001.
- [103] Caroline Colijn, Jukka Corander, and Nicholas J Croucher. Designing ecologically optimized pneumococcal vaccines using population genomics. *Nature Microbiology*, 5(3):473–485, 2020.
- [104] Max R Schroeder, Scott T Chancey, Stephanie Thomas, Wan-Hsuan Kuo, Sarah W Satola, Monica M Farley, and David S Stephens. A Population-Based Assessment of the Impact of 7- and 13-Valent Pneumococcal Conjugate Vaccines on Macrolide-Resistant Invasive Pneumococcal Disease: Emergence and Decline of *Streptococcus pneumoniae* Serotype 19A (CC320) With Dual Macrolide Resistance *Mec*. *Clinical infectious diseases : an official publication of the Infectious Diseases Society of America*, 65(6):990–998, 9 2017.
- [105] Ankita P Desai, Dolly Sharma, Emily K Crispell, Wendy Baughman, Stepy Thomas, Amy Tunali, Logan Sherwood, April Zmitrovich, Robert Jerris, Sarah W Satola, Bernard Beall, Matthew R Moore, Shabnam Jain, and Monica M Farley. Decline in Pneumococcal Nasopharyngeal Carriage of Vaccine Serotypes After the Introduction of the 13-Valent Pneumococcal Conjugate Vaccine in Children in Atlanta, Georgia. *The Pediatric infectious disease journal*, 34(11):1168–1174, 11 2015.
- [106] R J Redfield, M R Schrag, and A M Dean. The evolution of bacterial transformation: sex with poor relations. *Genetics*, 146(1):27–38, 5 1997.
- [107] Anna K. Lindholm, Kelly A. Dyer, Renée C. Firman, Lila Fishman, Wolfgang Forstmeier, Luke Holman, Hanna Johannesson, Ulrich Knief, Hanna Kokko, Amanda M. Larracuenta, Andri Manser,

- Catherine Montchamp-Moreau, Varos G. Petrosyan, Andrew Pomiankowski, Daven C. Presgraves, Larisa D. Safronova, Andreas Sutter, Robert L. Unckless, Rudi L. Verspoor, Nina Wedell, Gerald S. Wilkinson, and Tom A.R. Price. The Ecology and Evolutionary Dynamics of Meiotic Drive, 4 2016.
- [108] Mignon du Plessis, Edouard Bingen, and Keith P Klugman. Analysis of penicillin-binding protein genes of clinical isolates of *Streptococcus pneumoniae* with reduced susceptibility to amoxicillin. *Antimicrobial agents and chemotherapy*, 46(8):2349–57, 8 2002.
- [109] Marcin J. Skwark, Nicholas J. Croucher, Santeri Puranen, Claire Chewapreecha, Maiju Pesonen, Ying Ying Xu, Paul Turner, Simon R. Harris, Stephen B. Beres, James M. Musser, Julian Parkhill, Stephen D. Bentley, Erik Aurell, and Jukka Corander. Interacting networks of resistance, virulence and core machinery genes identified by genome-wide epistasis analysis. *PLOS Genetics*, 13(2):e1006508, 2 2017.
- [110] Regine Hakenbeck, Andrea König, Izabella Kern, Mark van der Linden, Wolfgang Keck, Danielle Billot-Klein, Raymond Legrand, Bernard Schoot, and Laurent Gutmann. Acquisition of Five High- and Medium-Level Penicillin-Binding Protein Variants during Transfer of High-Level  $\beta$ -Lactam Resistance from *Streptococcus mitis* to *Streptococcus pneumoniae*. *Journal of Bacteriology*, 180(7):1831 LP – 1840, 4 1998.
- [111] Regine Hakenbeck, Nadège Balmelle, Beate Weber, Christophe Gardès, Wolfgang Keck, and Antoine de Saizieu. Mosaic Genes and Mosaic Chromosomes: Intra- and Interspecies Genomic Variation of *Streptococcus pneumoniae*. *Infection and Immunity*, 69(4):2477 LP – 2486, 4 2001.
- [112] Rosemary J. Redfield. Do bacteria have sex? *Nature Reviews Genetics*, 2(8):634–639, 2001.
- [113] Roger Milkman, Erich Jaeger, and Ryan D McBride. Molecular Evolution of the *Escherichia coli* Chromosome. VI. Two Regions of High Effective Recombination. *Genetics*, 163(2):475 LP – 483, 2 2003.
- [114] B. Jesse Shapiro, Lawrence A. David, Jonathan Friedman, and Eric J. Alm. Looking for Darwin's footprints in the microbial world, 5 2009.
- [115] Christophe Fraser, William P. Hanage, and Brian G. Spratt. Recombination and the nature of bacterial speciation, 1 2007.
- [116] Claire Chewapreecha, Simon R Harris, Nicholas J Croucher, Claudia Turner, Pekka Marttinen, Lu Cheng, Alberto Pessia, David M Aanensen, Alison E Mather, Andrew J Page, Susannah J Salter, David Harris, Francois Nosten, David Goldblatt, Jukka Corander, Julian Parkhill, Paul Turner, and Stephen D Bentley. Dense genomic sampling identifies highways of pneumococcal recombination., 3 2014.
- [117] Mogens Kilian, David R. Riley, Anders Jensen, Holger Brüggemann, and Hervé Tettelin. Parallel evolution of *Streptococcus pneumoniae* and *Streptococcus mitis* to pathogenic and mutualistic lifestyles. *mBio*, 5(4):1–9, 2014.
- [118] Samuel K. Sheppard, Noel D. McCarthy, Daniel Falush, and Martin C.J. Maiden. Convergence of *Campylobacter* species: Implications for bacterial evolution. *Science*, 320(5873):237–239, 4 2008.
- [119] William P. Hanage, Christophe Fraser, and Brian G. Spratt. Fuzzy species among recombinogenic bacteria. *BMC Biology*, 3(1):6, 3 2005.



- [120] Marina Mingoia, Emily Tili, Esther Manso, Pietro E Varaldo, and Maria Pia Montanari. Heterogeneity of Tn5253-Like Composite Elements in Clinical *Streptococcus pneumoniae* Isolates. *Antimicrobial Agents and Chemotherapy*, 55(4):1453–1459, 11 2011.
- [121] P. Ayoubi, A. O. Kilic, and M. N. Vijayakumar. Tn5253, the pneumococcal  $\Omega$  (cat tet) BM6001 element, is a composite structure of two conjugative transposons, Tn5251 and Tn5252. *Journal of Bacteriology*, 173(5):1617–1622, 1991.
- [122] Marie Touchon, Louis Marie Bobay, and Eduardo P.C. Rocha. The chromosomal accommodation and domestication of mobile genetic elements, 12 2014.
- [123] Scott V. Nguyen and William M. McShan. Chromosomal islands of *Streptococcus pyogenes* and related streptococci: molecular switches for survival and virulence. *Frontiers in Cellular and Infection Microbiology*, 4:109, 8 2014.
- [124] Julie Scott, Prestina Thompson-Mayberry, Stephanie Lahmamsi, Catherine J King, and W Michael McShan. Phage-associated mutator phenotype in group A streptococcus. *Journal of bacteriology*, 190(19):6290–301, 10 2008.
- [125] Nathaniel D Chu, Sean A Clarke, Sonia Timberlake, Martin F Polz, Alan D Grossman, and Eric J Alm. A Mobile Element in mutS Drives Hypermutation in a Marine *Vibrio*. *mBio*, 8(1):02045–16, 3 2017.

## Supplementary Materials

Rate=2.24e+00,MRCA=1953.31,R2=0.08,p<1.00e-04

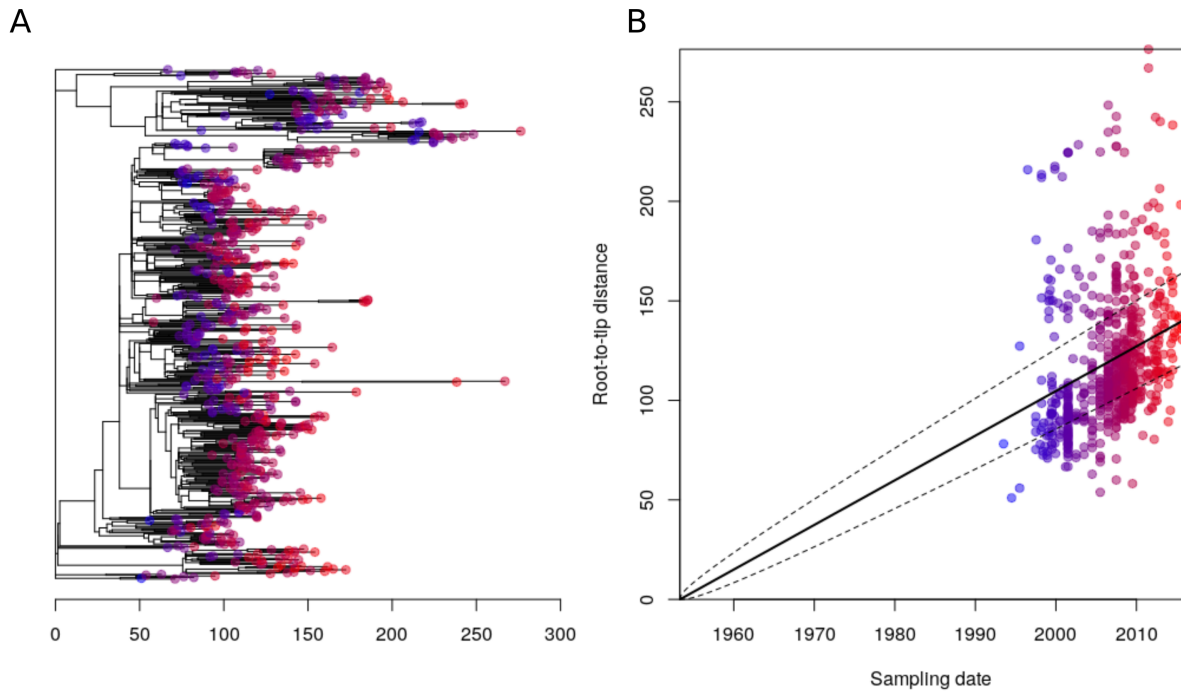

**Figure 2-figure supplement 1: Root to tip analysis of PMEN3 Lineage.** **A** Represents the 663 isolate phylogeny with node tips coloured by date of isolation. **B** Linear regression of root to tip distance against sampling date for Isolates.

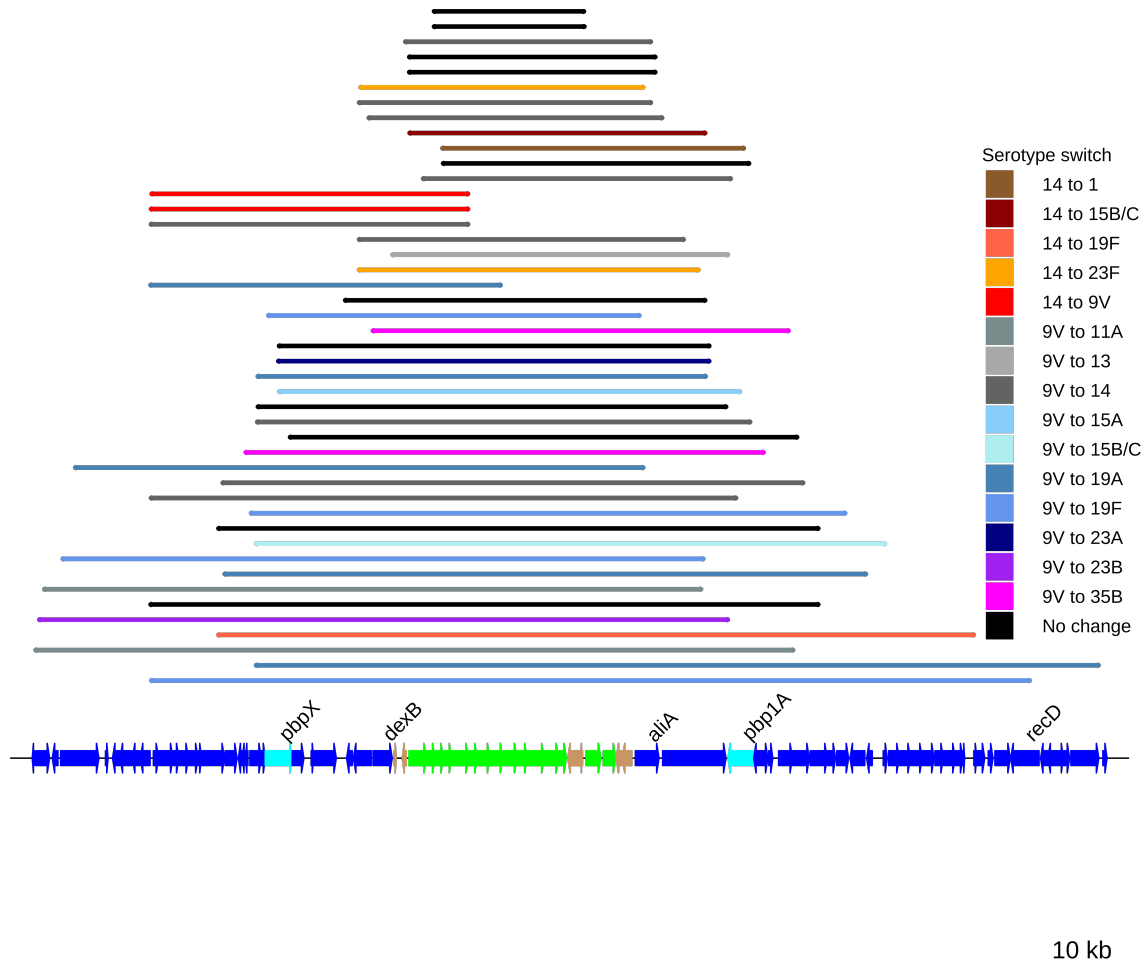

**Figure 2-figure supplement 2: Serotype switching events across the PMEN3 collection.** Coloured bars represent the recombination events associated with these switches in serotype. The bars map to the genome annotation below, with the length of the bar indicating a longer recombination event. The *cps* and surrounding loci are highlighted below, with some recombination events spanning further across the *pbp1a* and *pbp2x* genes as well. The black bars represent recombinations across the *cps* loci that weren't associated with a serotype switch.

Rate=1.16e+00,MRCA=1754.25,R2=0.05,p<1.00e-04

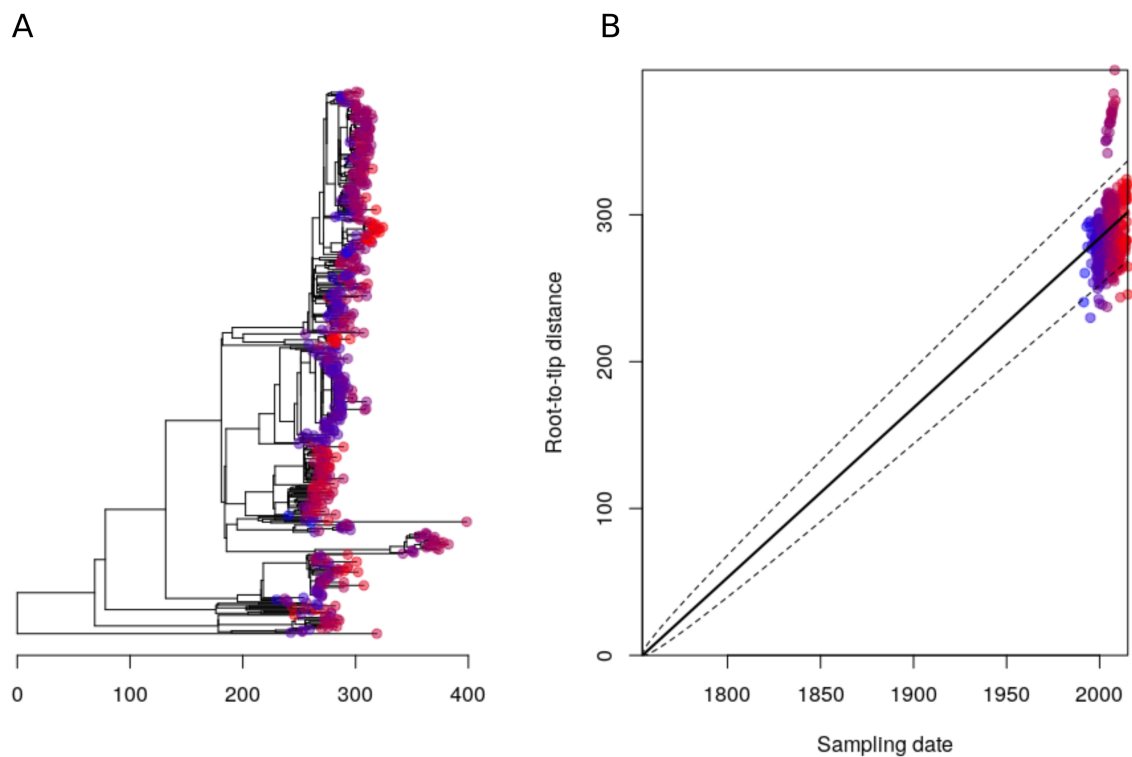

**Figure 3-figure supplement 1: Root to tip analysis of PMEN9 Lineage.** **A** Represents the trimmed 529 isolate phylogeny with node tips coloured by date of isolation. **B** Linear regression of root to tip distance against sampling date for Isolates.

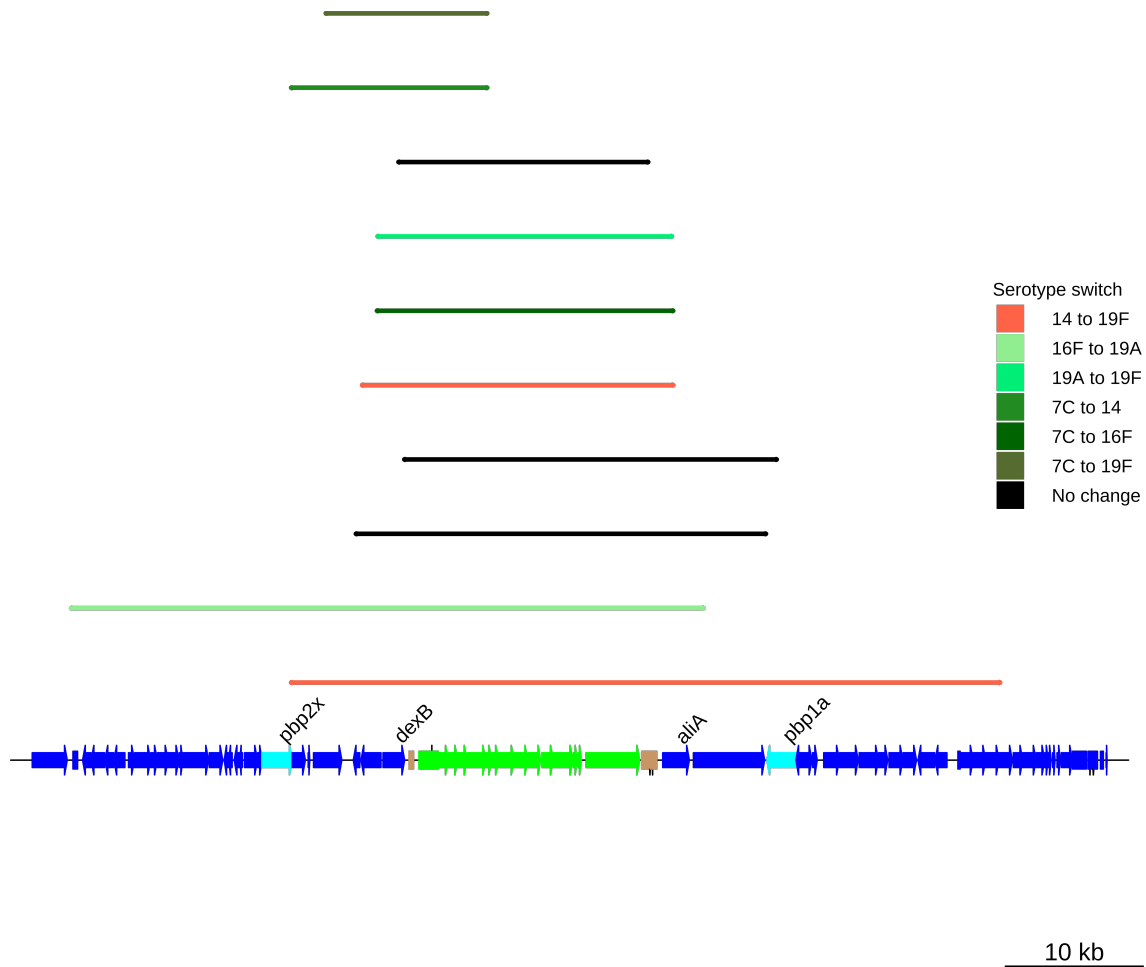

**Figure 3-figure supplement 2: Serotype switching events across the PMEN9 collection.** Coloured bars represent the recombination events associated with these switches in serotype. The bars map to the genome annotation below, with the length of the bar indicating a longer recombination event. The *cps* and surrounding loci are highlighted below, with some recombination events spanning further across the *pbp1a* and *pbp2x* genes as well. The black bars represent recombinations across the *cps* loci that weren't associated with a serotype switch.

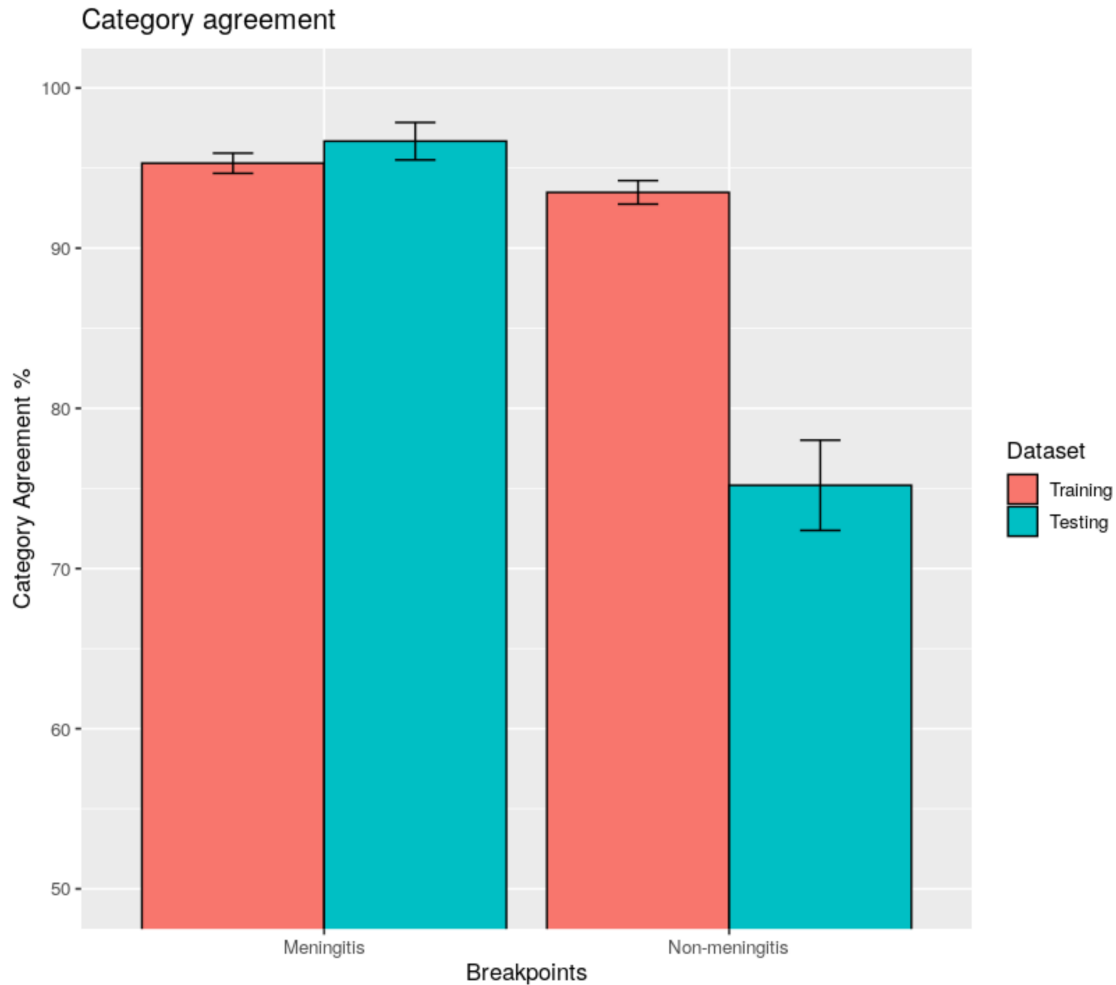

**Figure 5-figure supplement 1: Comparisons of Category Agreement across different penicillin resistance breakpoints.** Bars represent the category agreement, the number of categories correctly predicted across the testing or training dataset, for the two breakpoint sets tested. The training data for the model corresponds to the 4,342 isolate CDC dataset, while the testing dataset refers to the 903 PMEN lineage isolates with available MIC data.

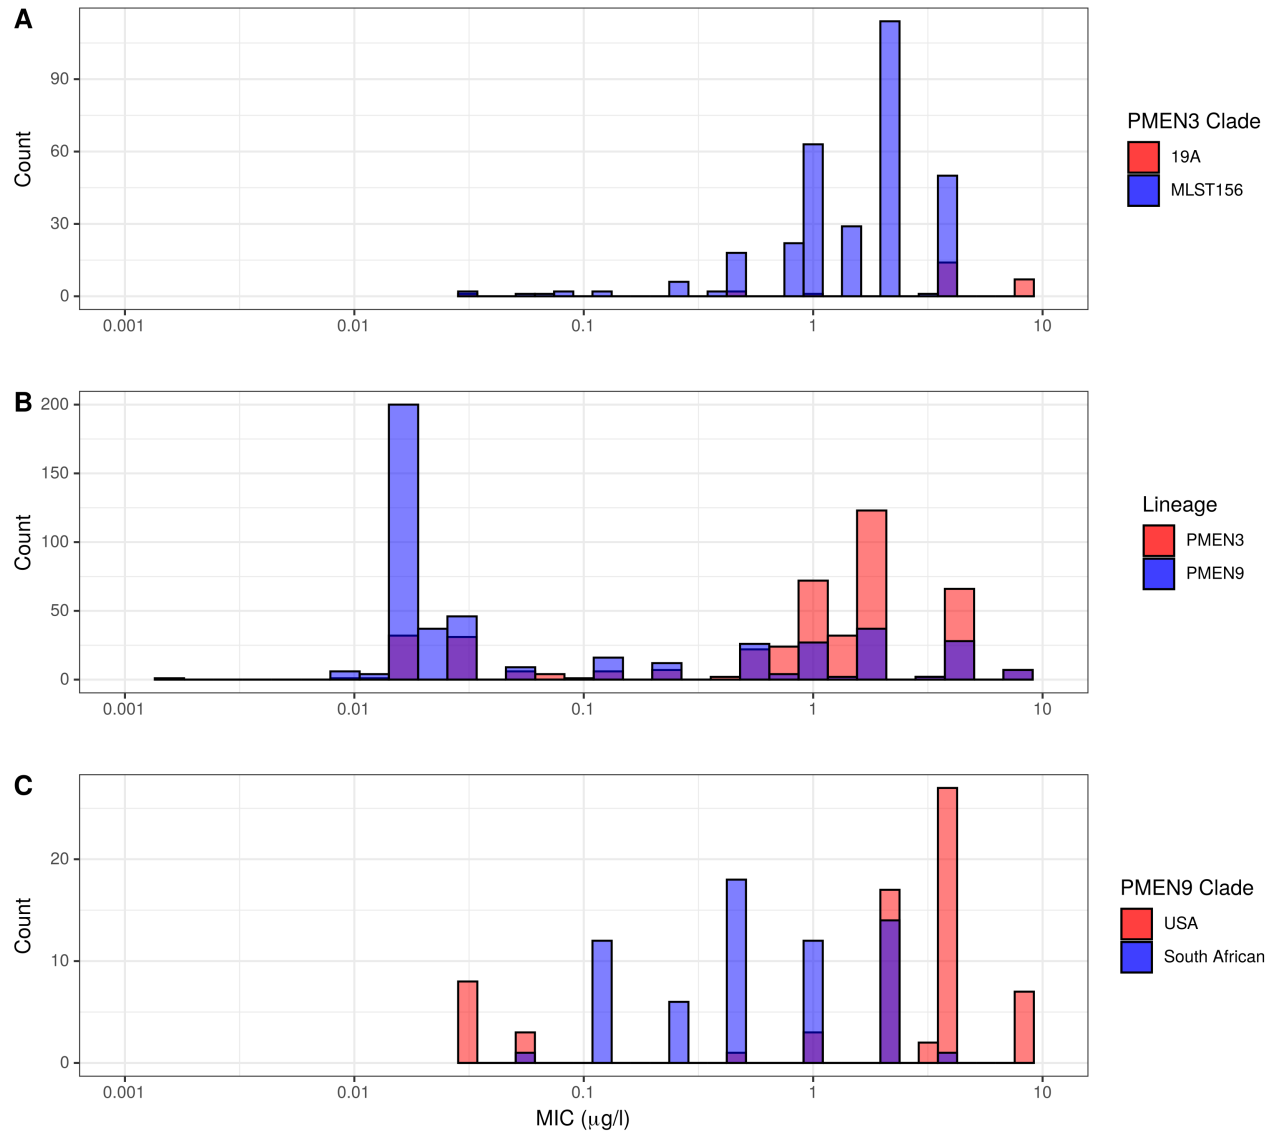

**Figure 5-figure supplement 2: Histograms of recorded MIC values for penicillin across the PMEN3 and PMEN9 collections. A** MIC values for penicillin for the primarily resistant clades ST156 and 19A within the PMEN3 collection. N = 313 for the ST156 clade and N = 25 for the 19A clade. **B** MIC for penicillin across both PMEN3 and PMEN9. N = 438 for PMEN3 and N = 465 for PMEN9. **C** MIC values for penicillin for the primarily resistant USA and South African clades within the PMEN9 collection. N = 68 for the USA clade and N = 64 for the South African clade.

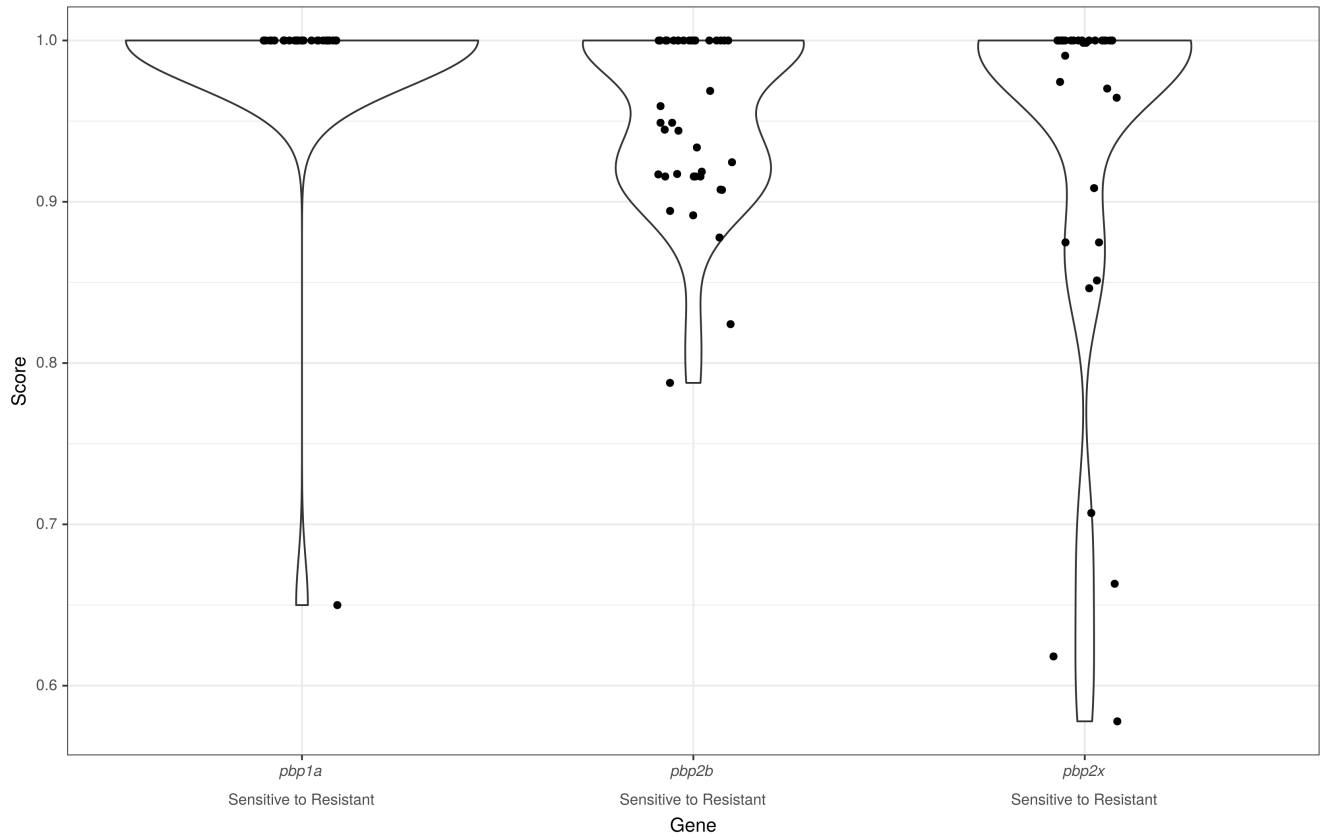

**Figure 5-figure supplement 3: Origin of *pbp* genes for penicillin resistant isolates.** Graph depicts the distribution of  $\gamma$  scores for *pbp* gene sequences within the gps collection where these genes are present within a gain of resistance associated homologous recombination event. Dots represent individual genes scores within recombination events. The wider distribution or scores is summarised by the violin plot outline.



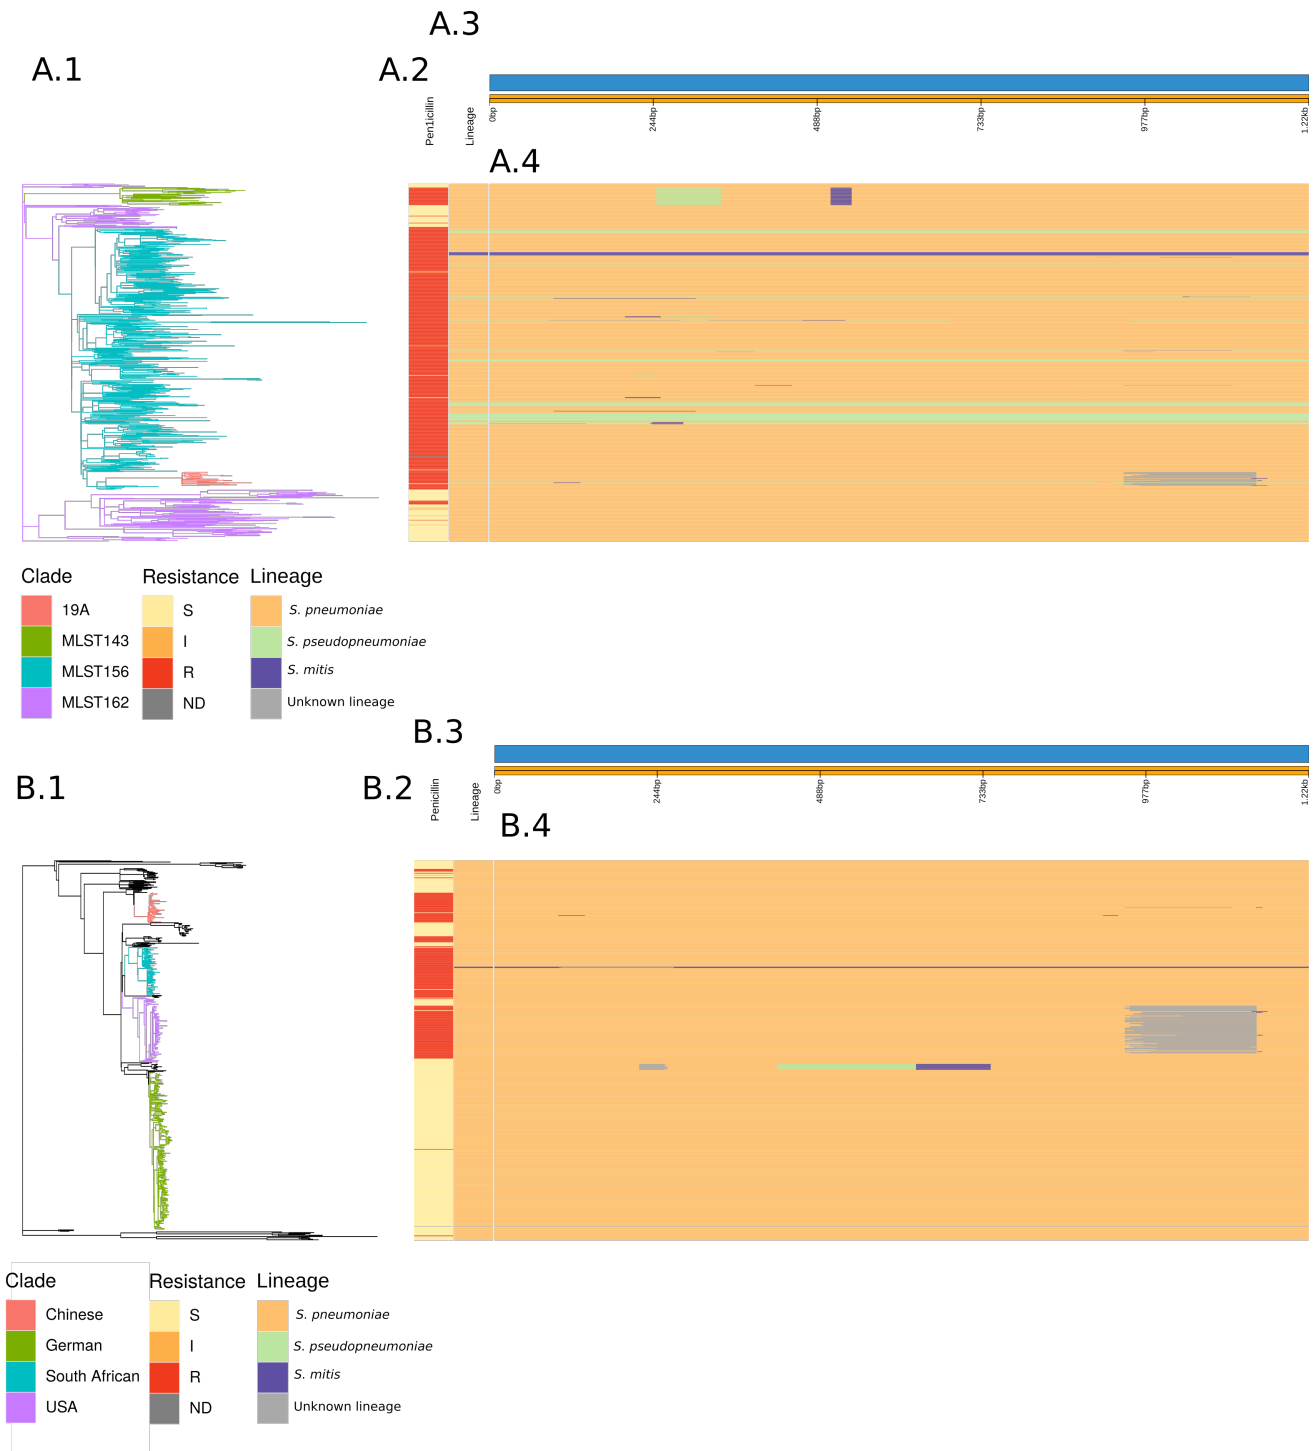

**Figure 5-figure supplement 4: Analysis of the origin of the *murM* gene across the PMEN3 and PMEN9 Lineages.** **A.1** The Recombination-corrected whole genome phylogeny of PMEN3, with branches coloured by clade of interest. **A.2** Bars indicating the penicillin resistance category of isolates and the lineage inferred for the *murM* gene of each isolate. **A.3** Representation of the *murM* gene. **A.4** This panel shows the inferred lineage for each base of each sequence across the PMEN3 phylogeny. Solid horizontal bars indicate sequences belonging to a particular lineage, as indicated by the colour. Changes in colour across a bar indicate different *murM* segments were inferred to originate in different lineages, suggesting a mosaic allele generated by recombination. **B.1** Recombination-corrected whole genome phylogeny of PMEN9, with branches coloured by clade of interest. **B.2** Bars indicating the penicillin resistance category of isolates and the overall lineage inferred for the *murM* gene of each isolate. **B.3** Representation of the *murM* gene. **B.4** This panel shows the inferred lineage for each base of each sequence across the PMEN9 phylogeny, as for the upper part of the figure.

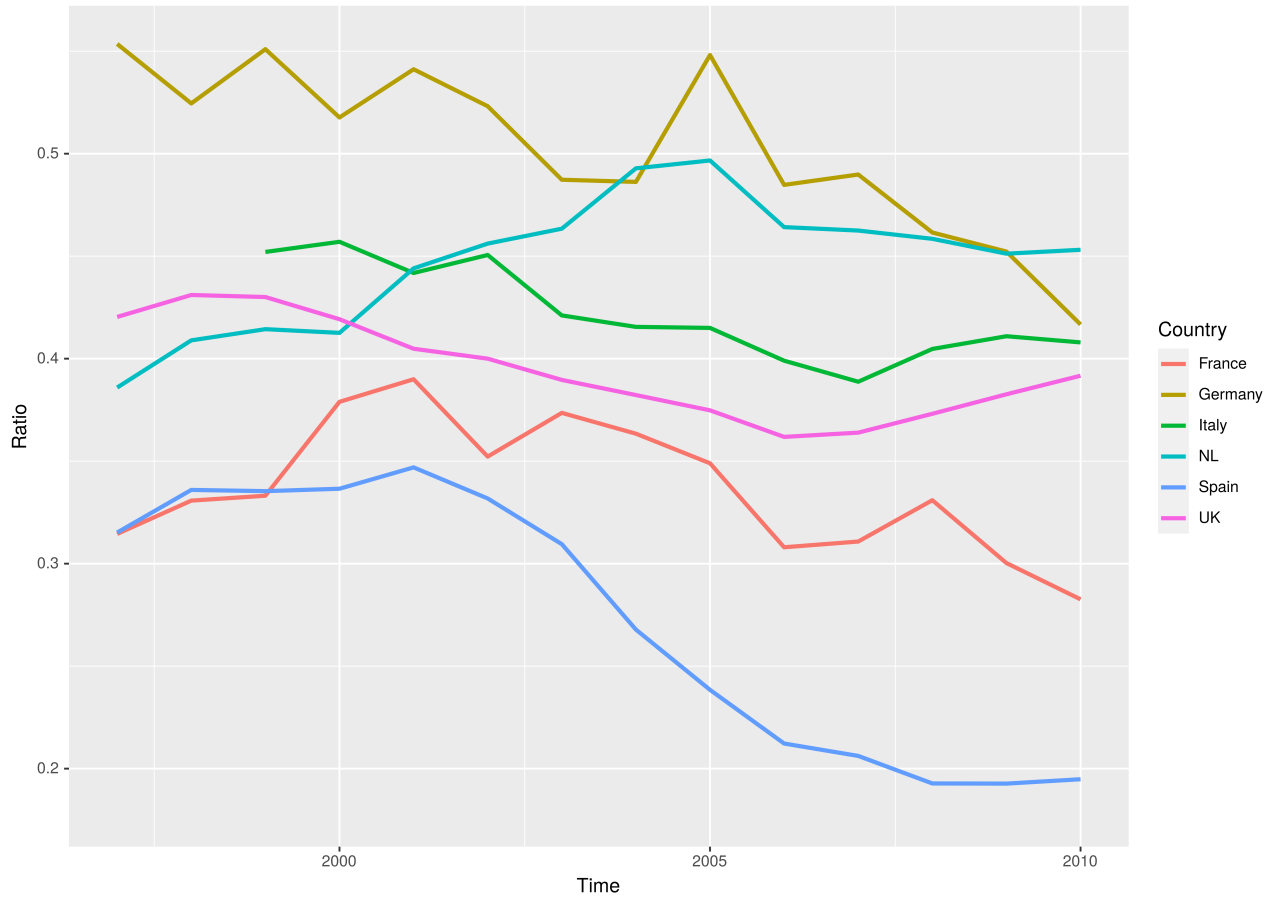

**Figure 6-figure supplement 1: Ratio of macrolide to penicillin consumption in Europe.** The ratios of macrolide use, in DDD, per penicillin use for 6 major European countries across a 13 year period from 1997 to 2010.

Rate=1.12e+00,MRCA=1970.49,R2=0.15,p<1.00e-04

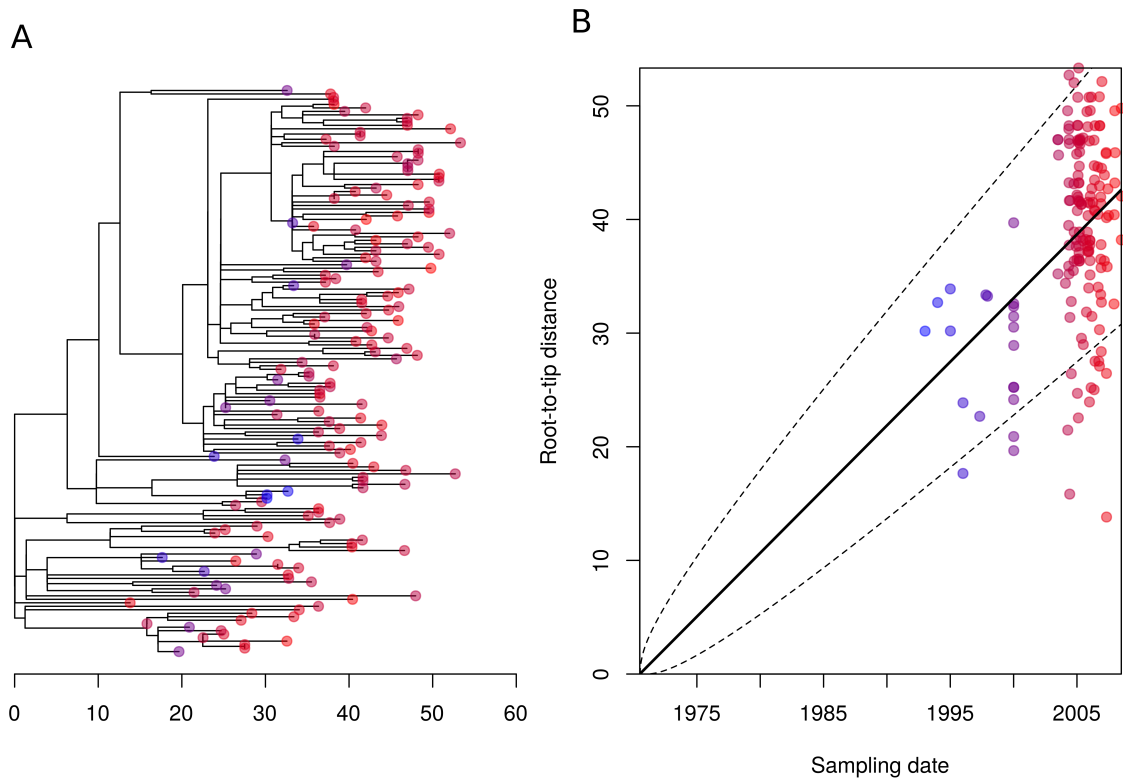

**Figure 6-figure supplement 2: Root to tip analysis of 162 German isolates within PMEN9. A** Represents the 162 isolate phylogeny with node tips coloured by date of isolation. **B** Linear regression of root to tip distance against sampling date for Isolates.

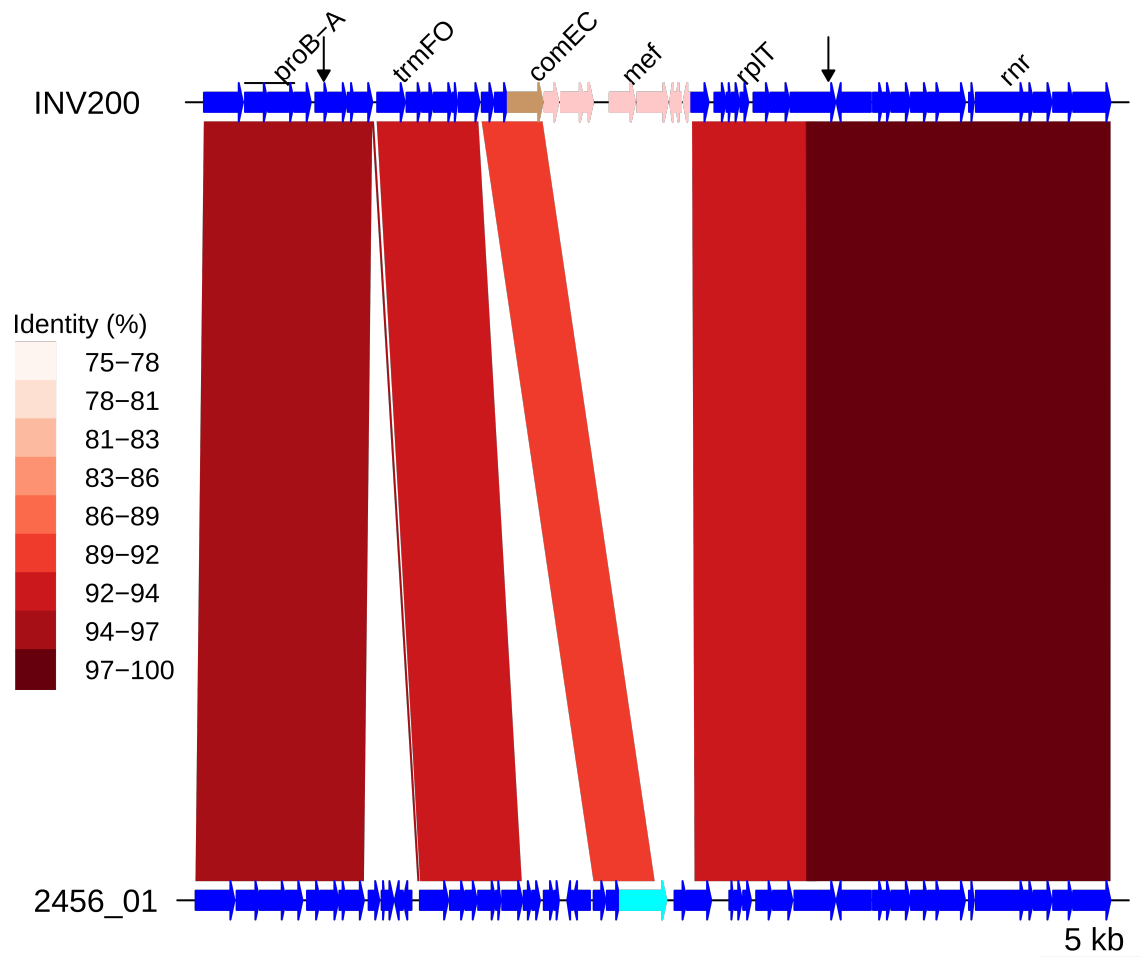

**Figure 6-figure supplement 3: Insert of Tn1207.1 within PMEN9 reference genome.** Comparison of the Tn1207.1 element insertion, highlighted in pink within the INV200 genome, and the 2456\_01 sample with an intact *comEC*. The split *comEC* gene is highlighted in brown within INV200, cyan within 2456\_01. Bars between the genome represent sequence matches, with these bars shaded by % identity between the sequences. Arrows along the INV200 genome mark the start and end of the recombination event bringing in the Tn1207.1 element.

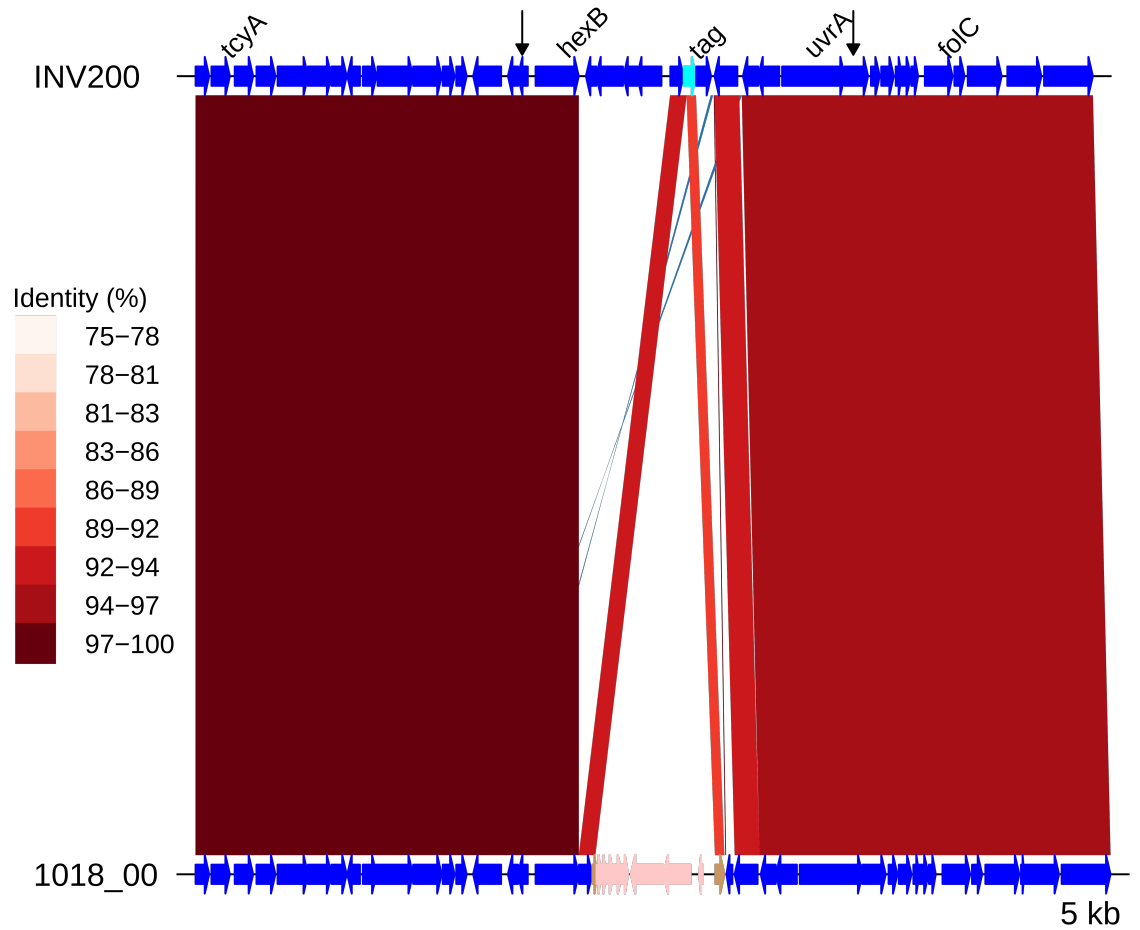

**Figure 7-figure supplement 1: Insert of Tn1207.1 as Mega within *tag*.** Comparison of the Tn1207.1 Mega element insertion, highlighted in pink within the 1018\_00 genome, and the INV200 sample with an intact *tag*. The split *tag* gene is highlighted in brown within 1018\_00 and the complete gene in cyan within INV200. Bars between the genome represent sequence matches, with these bars shaded by % identity between the sequences. Arrows along the 1018\_00 genome mark the start and end of the recombination event bringing in the Tn1207.1 Mega element.

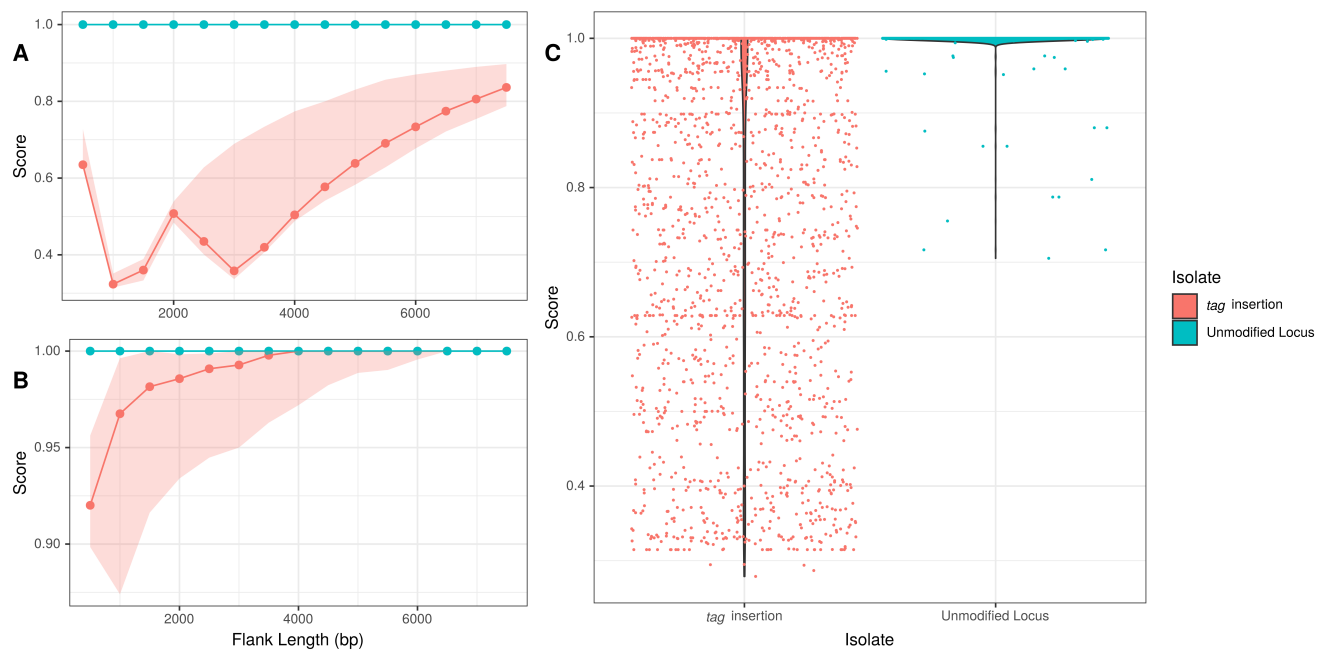

**Figure 10-figure supplement 1: Flanking region origin for *Tn1207.1* tag insertions.** **A** The median  $\gamma$  score of upstream flanking regions of the *Tn1207.1* tag insertion insertion events. The median  $\gamma$  score for the homologous regions in isolates without the MGE, and hence with an unmodified locus, are highlighted in cyan. Shaded regions represent the Inter-quartile range (IQR) of the  $\gamma$  score. **B** The  $\gamma$  score for regions extracted downstream of the insertion. Shaded regions represent the IQR of the  $\gamma$  score. **C** The distribution of  $\gamma$  scores across flanking lengths for flanks upstream and downstream of the *Tn1207.1* tag inserts, for both isolates with the insert and those with an unmodified homologous region.

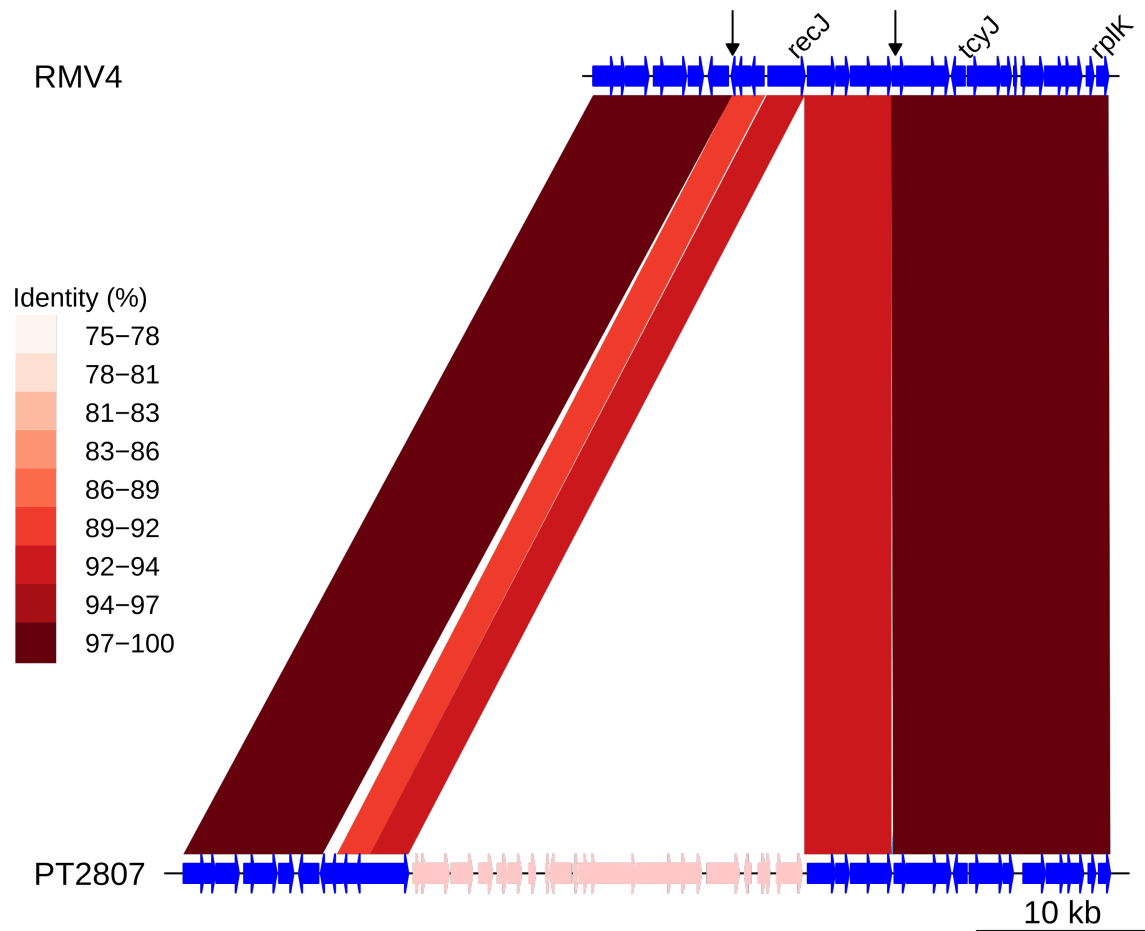

**Figure 8-figure supplement 1: Insert of Tn916 downstream of *recJ*.** Comparison of the Tn916 element insertion, highlighted in pink within the PT2807 genome, and the RMV4 sample with no insertion. Bars between the genome represent sequence matches, with these bars shaded by % identity between the sequences. Arrows along the RMV4 genome mark the start and end of the recombination event bringing in the Tn916 element.

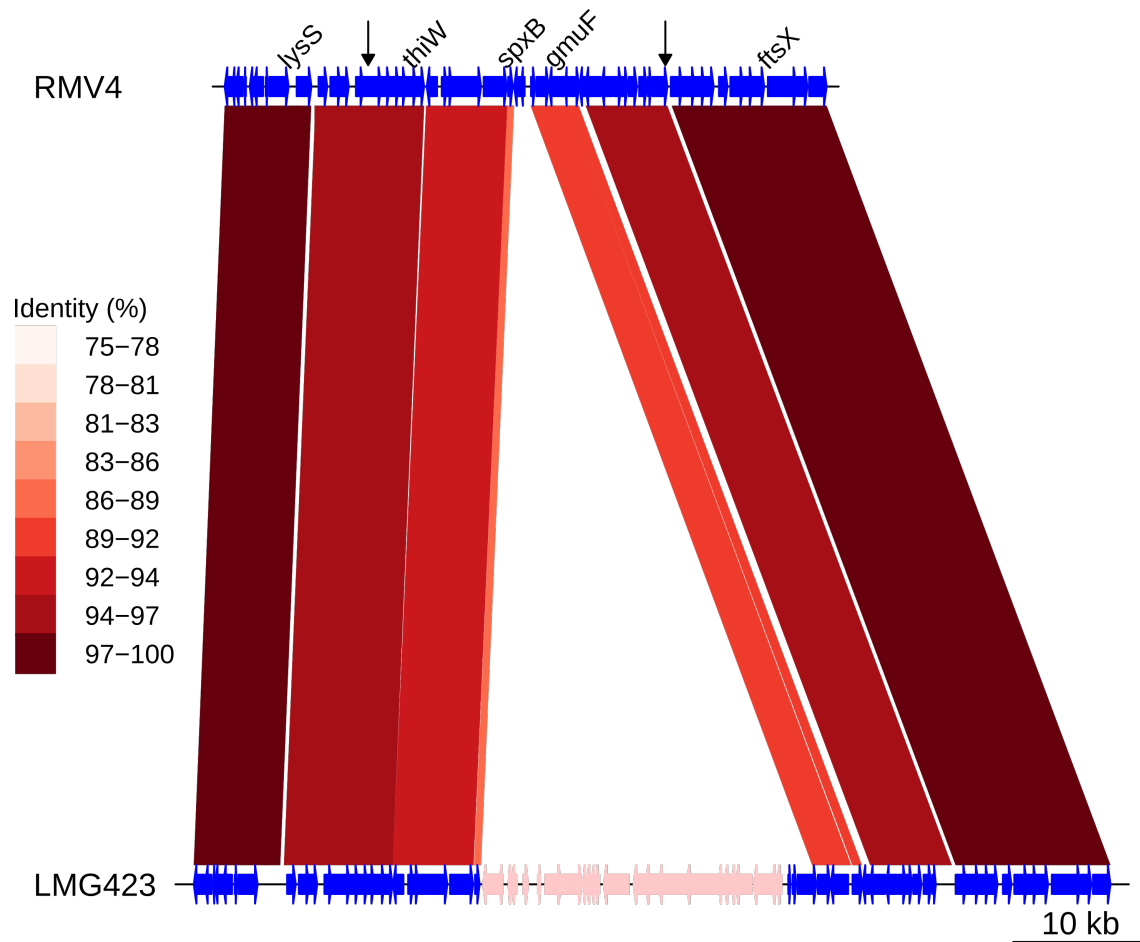

**Figure 8-figure supplement 2: Insert of Tn916 downstream of *gmuF*.** Comparison of the Tn916 element insertion, highlighted in pink within the LMG423 genome, and the RMV4 sample with no insertion. Bars between the genome represent sequence matches, with these bars shaded by % identity between the sequences. Arrows along the RMV4 genome mark the start and end of the recombination event bringing in the Tn916 element.



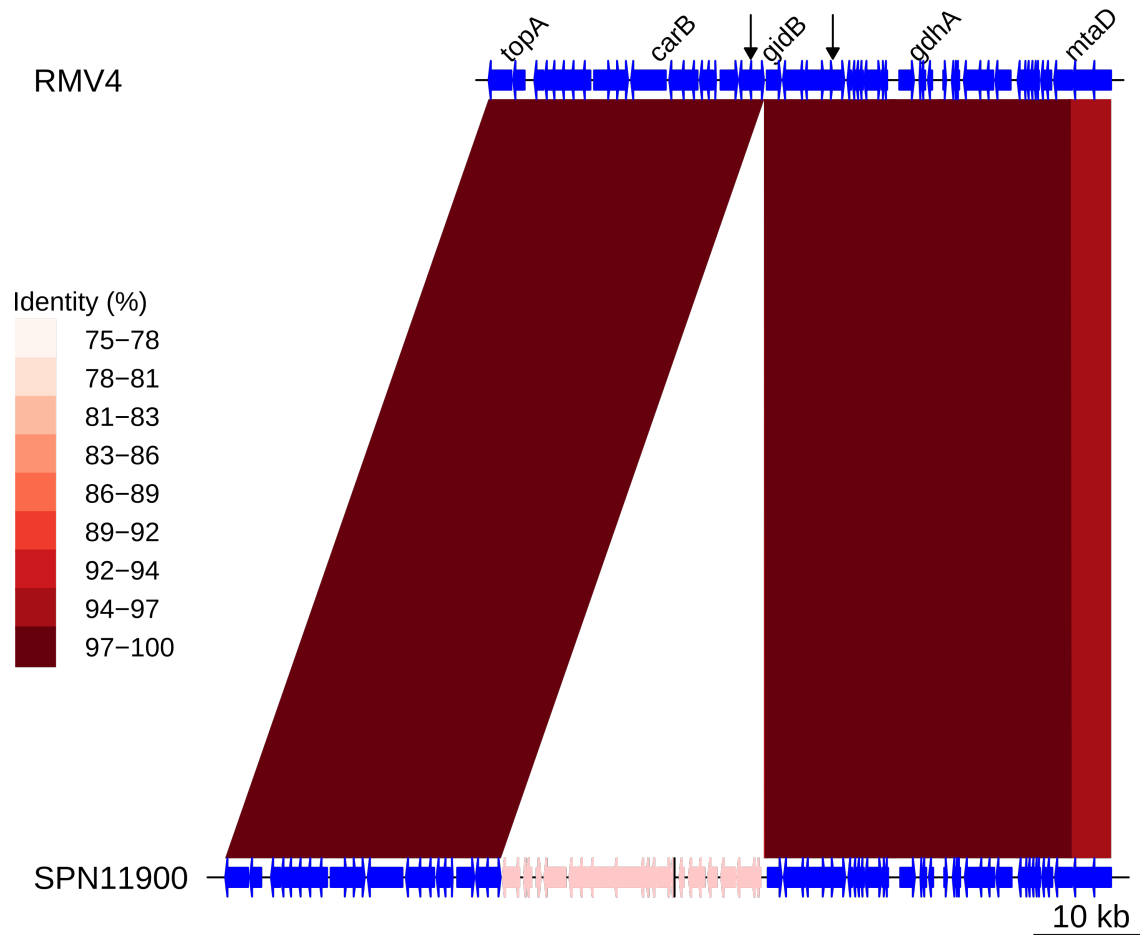

**Figure 8-figure supplement 3: Insert of Tn916 upstream of *gidB*.** Comparison of the Tn916 element insertion, highlighted in pink within the SPN11900 genome, and the RMV4 sample with no insertion. Bars between the genome represent sequence matches, with these bars shaded by % identity between the sequences. Arrows along the RMV4 genome mark the start and end of the recombination event bringing in the Tn916 element.

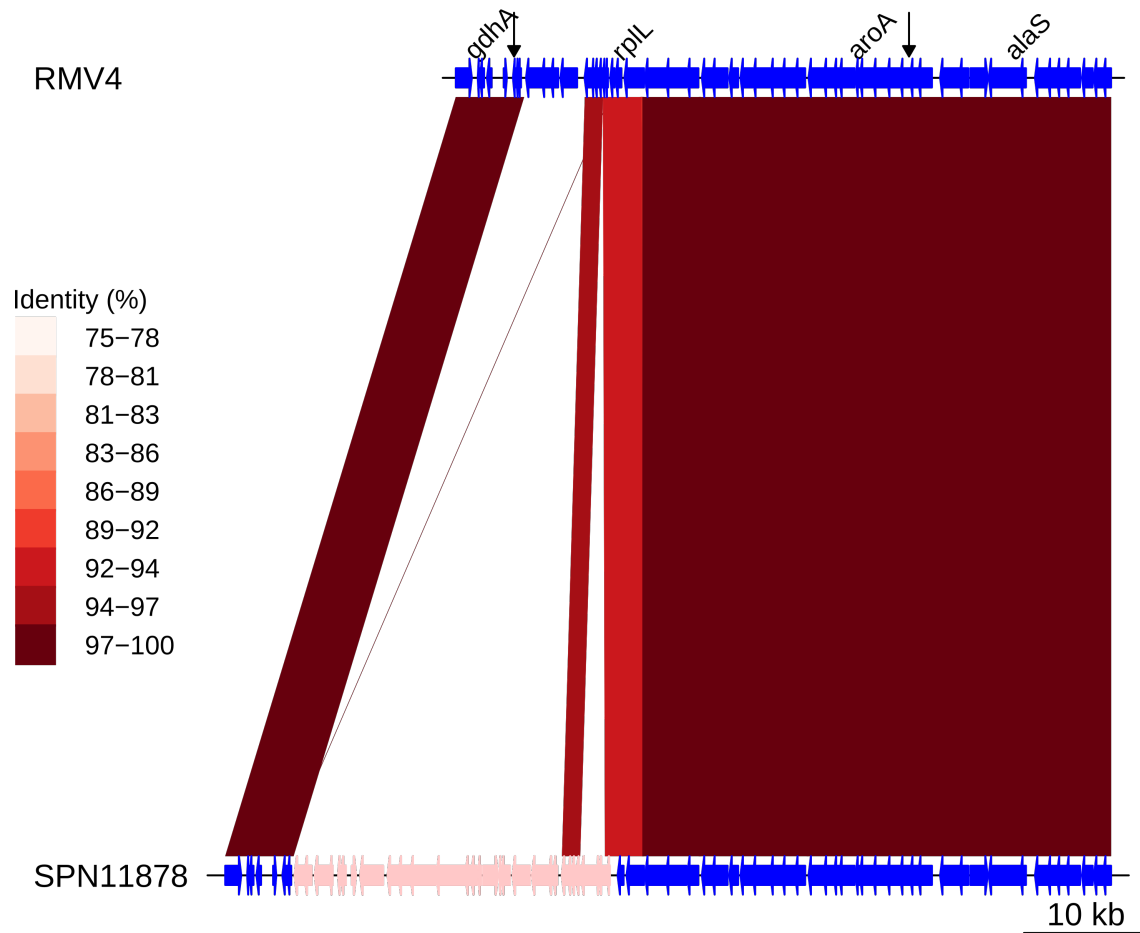

**Figure 8-figure supplement 4: Insert of Tn916 upstream of *rplL*.** Comparison of the Tn916 element insertion, highlighted in pink within the SPN11878 genome, and the RMV4 sample with no insertion. Bars between the genome represent sequence matches, with these bars shaded by % identity between the sequences. Arrows along the RMV4 genome mark the start and end of the recombination event bringing in the Tn916 element.

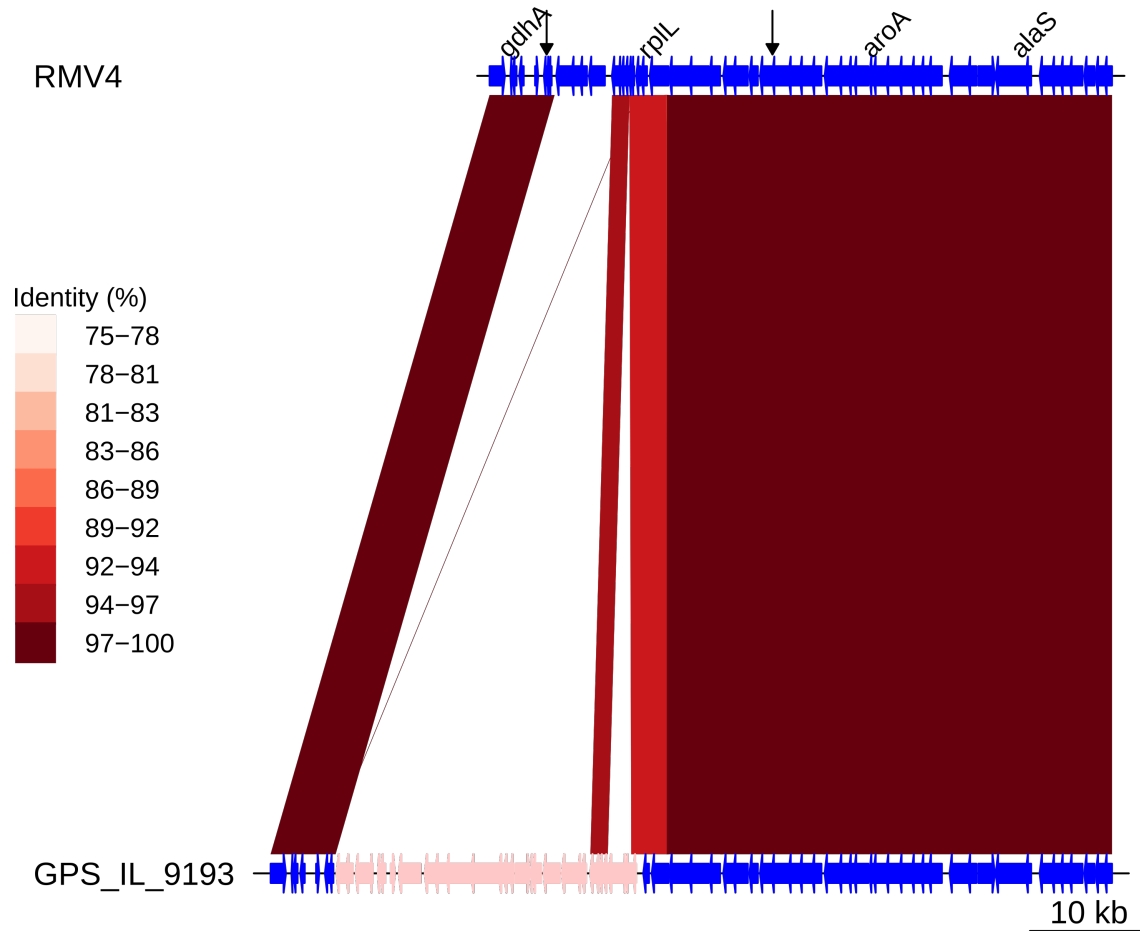

**Figure 8-figure supplement 5: Insert of Tn916 upstream of *rplL*.** Comparison of the Tn916 element insertion, highlighted in pink within the GPS\_IL\_9193 genome, and the RMV4 sample with no insertion. Bars between the genome represent sequence matches, with these bars shaded by % identity between the sequences. Arrows along the RMV4 genome mark the start and end of the recombination event bringing in the Tn916 element.

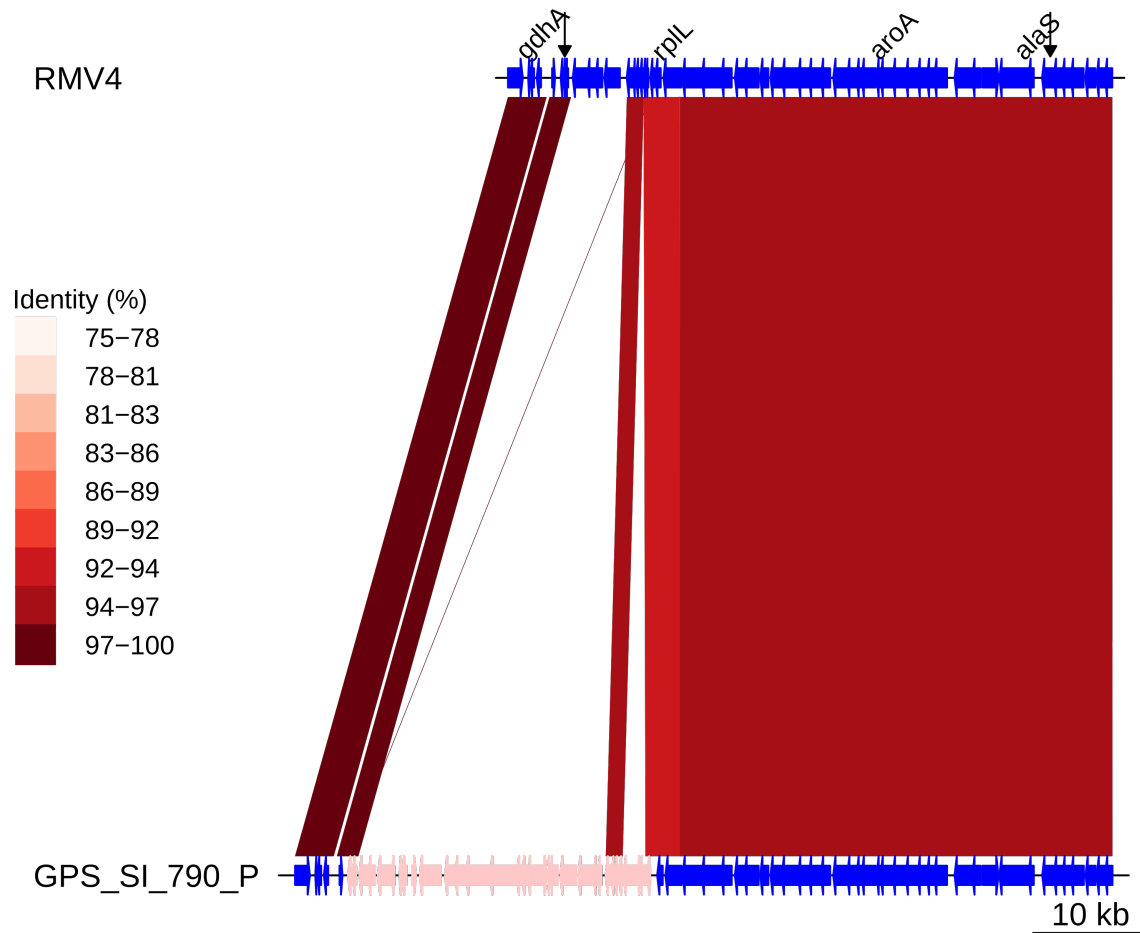

**Figure 8-figure supplement 6: Insert of Tn916 upstream of *rplL*.** Comparison of the Tn916 element insertion, highlighted in pink within the GPS\_SI\_790\_P genome, and the RMV4 sample with no insertion. Bars between the genome represent sequence matches, with these bars shaded by % identity between the sequences. Arrows along the RMV4 genome mark the start and end of the recombination event bringing in the Tn916 element.
